1           **Fine scale mapping of genomic introgressions within the**

2                                    *Drosophila yakuba* clade

3  
4   David A. Turissini<sup>1</sup> and Daniel R. Matute<sup>1</sup>

5  
6  
7   <sup>1</sup>Biology Department, University of North Carolina, Chapel Hill

8  
9   ¶ Correspondence:

10   Biology Department, University of North Carolina, 250 Bell Tower Road, Chapel Hill,  
11   27599.

12   Tel: 919-962-2077

13   Fax: 919-962-1625

14   E-mail: dmatute@email.unc.edu

15  
16   **Running title:** Introgressions within the *Drosophila yakuba*

17   **Keywords:** Introgression, hybrid zone, *Drosophila*, divergence

18 **ABSTRACT**

19

20 The process of speciation involves populations diverging over time until they are  
21 genetically and reproductively isolated. Hybridization between nascent species was  
22 long thought to directly oppose speciation. However, the amount of interspecific  
23 genetic exchange (introgression) mediated by hybridization remains largely  
24 unknown, although recent progress in genome sequencing has made measuring  
25 introgression more tractable. A natural place to look for individuals with admixed  
26 ancestry (indicative of introgression) is in regions where species co-occur. In west  
27 Africa, *D. santomea* and *D. yakuba* hybridize on the island of São Tomé, while *D.*  
28 *yakuba* and *D. teissieri* hybridize on the nearby island of Bioko. In this report, we  
29 quantify the genomic extent of introgression between the three species of the  
30 *Drosophila yakuba* clade (*D. yakuba*, *D. santomea*, *D. teissieri*). We sequenced the  
31 genomes of 86 individuals from all three species. We also developed and applied a  
32 new statistical framework, using a hidden Markov approach, to identify  
33 introgression. We found that introgression has occurred between both species pairs  
34 but most introgressed segments are small (on the order of a few kilobases). After  
35 ruling out the retention of ancestral polymorphism as an explanation for these  
36 similar regions, we find that the sizes of introgressed haplotypes indicate that  
37 genetic exchange is not recent ( $>1,000$  generations ago). We additionally show that  
38 in both cases, introgression was rarer on *X* chromosomes than on autosomes which  
39 is consistent with sex chromosomes playing a large role in reproductive isolation.  
40 Even though the two species pairs have stable contemporary hybrid zones,  
41 providing the opportunity for ongoing gene flow, our results indicate that genetic  
42 exchange between these species is currently rare.

43

44

45 **AUTHOR SUMMARY**

46

47           Even though hybridization is thought to be pervasive among animal species,  
48 the frequency of introgression, the transfer of genetic material between species,  
49 remains largely unknown. In this report we quantify the magnitude and genomic  
50 distribution of introgression among three species of *Drosophila* that encompass the  
51 two known stable hybrid zones in this genetic model genus. We obtained whole  
52 genome sequences for individuals of the three species across their geographic range  
53 (including their hybrid zones) and developed a hidden Markov model-based method  
54 to identify patterns of genomic introgression between species. We found that  
55 nuclear introgression is rare between both species pairs, suggesting hybrids in  
56 nature rarely successfully backcross with parental species. Nevertheless, some *D.*  
57 *santomea* alleles introgressed into *D. yakuba* have spread from São Tomé to other  
58 islands in the Gulf of Guinea where *D. santomea* is not found. Our results indicate  
59 that in spite of contemporary hybridization between species that produces fertile  
60 hybrids, the rates of gene exchange between species are low.

61

## 62 INTRODUCTION

63

64 When two species hybridize, produce fertile hybrids and persist, three  
65 outcomes are possible. First, genes from one of the species might be selected against  
66 in their hybrids thus removing “foreign” genes from the gene pool, with the rate of  
67 removal being proportional to the product of the population size and the strength of  
68 selection [1-4]. Second, some alleles will have no fitness effects and may be retained  
69 in the population or lost due to drift. Finally, some introduced genes could be  
70 maintained in the population because they are advantageous ([2], [3]; but see [4] for  
71 additional possibilities). Such introgressed alleles can be a source of novel genetic  
72 (and phenotypic) variation.

73 The frequency and fate of introgressed alleles has been investigated in only a  
74 few cases (e.g., [5-11] among many others; reviewed in [12,13]), and the  
75 susceptibility of genomes to introgression is the target of lively debate among  
76 evolutionary biologists. Obtaining conclusive evidence about the magnitude of  
77 introgression is difficult and has led to two general views in speciation research.  
78 Some maintain that genomes are co-adapted units that can tolerate very little  
79 foreign contamination [14-16]. Others argue that closely related species differ only  
80 in a few distinct genomic regions responsible for reproductive isolation and can not  
81 only tolerate considerable introgression elsewhere [2,17] but may even benefit from  
82 it [18-20]. In reality, both instances occur, but to understand how prevalent  
83 introgression is during the speciation process, we require systematic assessments of  
84 the rate and identity of introgressions in varied biological systems

85 Current efforts to detect introgression have found the process to be pervasive in  
86 nature (e.g., [13,21-23]). Yet, one of the main limitations of this inference is that  
87 most models of introgression are tailored to detect recent introgression where  
88 introgressed haplotypes are found in large, contiguous blocks [24]. Powerful  
89 analytic tools such as HAPMIX [25], ELAI [26], ChromoPainter [27] and others  
90 heavily rely on linkage disequilibrium or phased genomic data which makes them  
91 inapplicable to many organisms [28-30]. A second limitation is that some methods  
92 [31-33] will estimate the amount of introgression but not specific introgressed

93 genomic regions, precluding the measuring the frequency of introduced segments.  
94 Ideally methods for detecting introgressions would be able to identify introgressed  
95 segments within individuals and not need haplotype information and/or phased  
96 genotypes which might not be available for all taxa.

97 Even though *Drosophila* has been a premier system for studying how  
98 reproductive isolation evolves, until recently interspecific gene flow within the  
99 taxon has been understudied because hybrid zones were either unknown or  
100 uncharacterized. Yet, neither gene flow, nor hybrid zones are absent in the  
101 *Drosophila* genus [8,34-36].

102 The *D. yakuba* species clade is composed of three species (*D. yakuba*, *D.*  
103 *santomea*, and *D. teissieri*) whose last common ancestor is thought to have existed  
104 ~1.0 million years ago (MYA) [37]. *Drosophila yakuba* is a human-commensal that is  
105 widespread throughout sub-Saharan Africa and is also found on islands in the Gulf  
106 of Guinea [38-40]. *Drosophila teissieri*, like *D. yakuba*, is also distributed across  
107 large portions of the continent but is largely restricted to forests with *Parinari*  
108 (Chrysobalanaceae) trees [41-43]. *Drosophila santomea* is restricted to the island of  
109 São Tomé in the Gulf of Guinea. *Drosophila yakuba* also lives on São Tomé and  
110 occurs at low elevations (below 1,450 m) and is mostly found in open and semidry  
111 habitats commonly associated with agriculture and human settlements [39,44]. In  
112 contrast, *D. santomea* is endemic to the highlands of São Tomé where it is thought to  
113 exclusively breed on endemic figs (*Ficus chlamydocarpa fernandesiana*, Moraceae;  
114 [45]). *Drosophila yakuba* and *D. santomea* produce sterile male and fertile female  
115 hybrids, and the two species co-occur in a hybrid zone in the midlands on the  
116 mountain Pico de São Tomé [38,44,46]. Backcrossed females and some males are  
117 fertile [47,48]. Oddly, a second stable hybrid zone composed exclusively of hybrid  
118 males occurs on top of Pico de São Tomé largely outside the range of the two  
119 parental species [49].

120 Within *Drosophila*, the *D. santomea*/*D. yakuba* hybrid zone is the best  
121 studied for at least three reasons. First, it has the highest known frequency of  
122 hybridization: on average, 3-5% of *yakuba* clade individuals collected in the

123 midlands of São Tomé are F1 hybrids [44]. Second, the hybrid zone is stable and has  
124 persisted since its discovery in 1999 [38,44,49,50] which makes it one of the two  
125 stable hybrid zones in the genus (along with *D. yakuba*/*D. teissieri*, see below).  
126 Third, F1 hybrids are easily identified by their characteristic abdominal  
127 pigmentation [51,52]. Advanced intercrosses are harder to identify since  
128 pigmentation patterns regress toward the parental species in just one or two  
129 generations of backcrossing [52].

130 *Drosophila teissieri* is the sister species to the *D. yakuba*/*D. santomea*  
131 (*yak/san*) dyad. It is distributed throughout tropical Africa and is thought to have  
132 occupied a much larger range before humans expanded into the forests of Sub-  
133 Saharan Africa [43,53]. Even though it breeds at higher elevations (over 500m), it is  
134 commonly found in the same locations where *D. yakuba* is collected [41,43,54]. The  
135 species is thought to be a narrow specialist of the ripe fruit of *Parinari* [41,53]. The  
136 nuclear genomes of *D. yakuba* and *D. teissieri* differ by numerous fixed inversions,  
137 which were long thought to preclude hybridization ([55] but see [37,56]).  
138 Nonetheless, *D. teissieri* does produce hybrids with *D. yakuba* and *D. santomea* in  
139 the laboratory [57]. F1 females (from both reciprocal directions of the cross) and  
140 some backcrossed individuals are fertile [57]. Field collections have also found a  
141 stable and narrow hybrid zone between *D. yakuba* and *D. teissieri* in the highlands  
142 on the island of Bioko at the interface between cultivated areas and secondary forest  
143 [54].

144 Across both the *yak/san* and *D. yakuba*/*D. teissieri* (*yak/tei*) hybrid zones,  
145 little is known about the genomic and geographic distributions of introgression.  
146 Genealogies from two mitochondrial genes (*COII* and *ND5*; 1,777 bp) show *D.*  
147 *yakuba* and *D. santomea* individuals interspersed, especially for individuals  
148 collected in the hybrid zone of São Tomé. A mitochondrial genome survey still  
149 shows admixture but to a lesser extent [58]. Additionally, mitochondrial divergence  
150 between the three species is much lower than expected given the levels of  
151 divergence observed for the nuclear loci [37,56,58]. The discrepancy has been  
152 interpreted as mitochondrial introgression resulting in the homogenization of the  
153 mitochondrial genome within the clade.

154           Despite this emphasis on mitochondrial introgression, little is known about  
155 the extent of nuclear introgression between *D. yakuba* and *D. santomea*. Preliminary  
156 genetic analyses [37,39] found evidence of gene flow for two autosomal loci that  
157 showed low levels of divergence relative to the other typed loci. Beck et al. [59] also  
158 found nuclear introgression from *D. yakuba* into *D. santomea* of genes coding for  
159 nuclear pore proteins that interact with mitochondrial gene products. No study has  
160 however addressed the possibility of gene flow between *D. yakuba* and *D. teissieri*,  
161 and no systematic genomic effort has addressed the magnitude of gene flow  
162 between *D. yakuba* and *D. santomea*. We focus on measuring whether, similar to the  
163 mitochondrial genome, the nuclear genomes within the *yakuba* species group show  
164 evidence of introgression.

165           To characterize introgression within the *yakuba* species group we developed  
166 a new statistical framework to identify introgressed regions of the genome. Since  
167 linkage disequilibrium in *Drosophila* usually decays fast (on the order of a few  
168 hundred base pairs; [60] but see [61,62]), we were not able to use available LD-  
169 based methods to detect introgression. Our method (Int-HMM) relies on the  
170 identification of stretches of differentiated SNPs, and uses a hidden Markov Model  
171 (HMM) approach to identify introgressed regions from unphased whole genome  
172 sequencing data. The framework does not require pre-identified pure-species  
173 samples from allopatric regions, and is able to identify introgressions on the order  
174 of 1kb with low false positive rates (<1%). We used this model to quantify the  
175 magnitude of introgression between *D. yakuba*/*D. santomea* and *D. yakuba*/*D.*  
176 *teissieri*. We found that nuclear introgression is rare between the two species pairs  
177 despite hybrids being identified in nature. We also found that some alleles that have  
178 introgressed from *D. santomea* into *D. yakuba* have spread from São Tomé to other  
179 islands in the Gulf of Guinea where *D. santomea* is not currently found.

180

181

## 182 RESULTS

183

### 184 Molecular divergence and approximate species divergence times

185 *Drosophila yakuba* and *D. santomea* had been previously estimated to have  
186 diverged ~393,000 years ago [51] and ~500,000 years ago [37]. Bachtrog et al. [37]  
187 also estimated the divergence time between *D. yakuba* and *D. teissieri* to be ~1  
188 million years ago. However, these estimates were based on only a few nuclear loci  
189 (N~15 DNA fragments). We estimated the divergence times using the number of  
190 synonymous substitutions ( $K_s$ ) from 14,267 genes [57] using the same approach as  
191 Llopart et al. [63]. We had previously estimated  $K_s$  between *D. yakuba* and *D.*  
192 *santomea* as 0.0479 and between *D. yakuba* and *D. teissieri* as 0.1116 [57]. We then  
193 compared these  $K_s$  values to the  $K_s$  of 0.1219 between *D. melanogaster* and *D.*  
194 *simulans* [64], which are estimated to have diverged 3 million years ago [65]).  
195 Assuming comparable substitutions rates between the two groups, we obtained  
196 estimated divergence times of 1.18 million years ago for the *D. yakuba* – *D.*  
197 *santomea* split and 2.75 million years ago for the divergence time between *D.*  
198 *yakuba* and *D. teissieri*. The level of divergence between the latter pair is surprising  
199 considering that *D. yakuba* and *D. teissieri* produce fertile F1 females and have a  
200 stable hybrid zone on the island of Bioko, while species with similar divergence (e.g.,  
201 *D. melanogaster* and *D. simulans* whose divergence time is estimated to be between  
202 3 and 5 MYA; [66,67]) produce sterile or inviable hybrids ([68]; Table S10 in [57]).

203

### 204 PCA

205 We used principle component analyses (PCA) to investigate genomic  
206 divergence among all three *D. yakuba*-clade species. Analyses were completed  
207 separately for the X chromosome and the autosomes (Figure S1) as sex  
208 chromosomes and autosomes often experience different demography and selection  
209 patterns [69,70]. Principal components (PCs) 1, 2, and 3 separate the species for  
210 both the X and autosomes. Collectively the first three PCs explain 77.8% of the  
211 variation for the autosomes and 79.9% of the variation for the X chromosome.  
212 Among the three species, *D. yakuba* exhibited the most variation for all 3 principle



213 components. We did not observe any overlap between the species. Four *D. santomea*  
214 lines were slightly more similar to *D. yakuba* for both PC 1 and 2 on the autosomes  
215 and were not included in the donor population when selecting markers for the *san-*  
216 *into-yak* HMM analysis (see below).

217

## 218 **Detecting Evidence of Introgression**

219

### 220 **(i) Patterson's D statistic**

221 We first explored the occurrence of introgression using multiple versions of  
222 the Patterson's D statistic (i.e., ABBA BABA test, [31,33,71]). Because the test  
223 requires potentially admixed populations and a population without gene flow of the  
224 recipient species, we tested for gene flow from *D. santomea* into *D. yakuba*. We used  
225 *D. yakuba* from the continent as the outgroup and *D. yakuba* from São Tomé as the  
226 potential recipient. (*Drosophila santomea* has a relatively small range, and we have  
227 been unable to find bona fide allopatric populations.) We found significant  
228 introgression between *D. yakuba* and *D. santomea* but the average direction of  
229 introgression depends on the choice of outgroup (Table 1). If *D. teissieri* is the  
230 outgroup of the test, the most common direction of introgressions is *D. santomea*  
231 into *D. yakuba* (*san-into-yak*). If *D. melanogaster* is the outgroup of the test, the  
232 most common direction of introgressions is *D. yakuba* into *D. santomea* (*yak-into-*  
233 *san*). All of our other analyses (see below) however indicate that introgression is  
234 more common in the *yak-into-san* direction indicating that *D. melanogaster* reads  
235 might not map well to the *D. yakuba* genome due to the increased divergence  
236 between *D. melanogaster* and *D. yakuba* ( $K_s \sim 0.26$  [72]; especially at regions less  
237 constrained by selection such as intergenic regions); the choice of outgroup is  
238 clearly relevant.

239 Next, we computed Patterson's D statistic looking for gene flow between *D.*  
240 *yakuba* and *D. teissieri*. We focused on *D. teissieri* from the hybrid zone on Bioko as  
241 the recipient population of introgression. We find evidence for introgression in this  
242 species pair (Table 1). The average direction of gene flow is from *tei-into-yak* (*D.*  
243 *yakuba* from Bioko). These results provide evidence that there has indeed been

244 genetic exchange between the two species pairs that naturally hybridize in the  
245 *yakuba* species complex.

246

247 **Figure 1. *Treemix* results for the *D. yakuba* clade indicate gene flow has occurred**  
248 **among species of the *yakuba* clade. *Treemix* trees with the best supported number of**  
249 **migration edges. *D. yakuba* has been split into four populations: “africa” (Cameroon,**  
250 **Kenya, Ivory Coast), “islands” (Príncipe and Bioko), “low\_st” (lowlands of São**  
251 **Tomé), and “hz\_st” (hybrid zone on São Tomé). A) Autosomal tree with 4 migration**  
252 **edges. B) X chromosome tree with 2 migration edges. Other demographic scenarios**  
253 **are shown in Figures S2 and S3.**

254

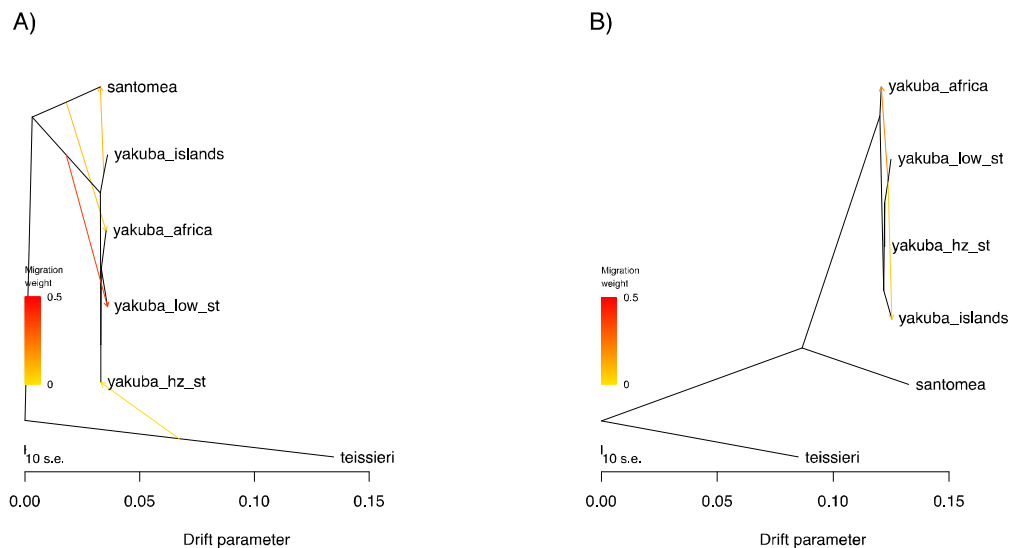

255  
256

## 257 (ii) *Treemix*

258 We used the program *Treemix* to identify gene flow between species and  
259 populations within the *D. yakuba* clade. We ran *Treemix* separately for the X  
260 chromosome (Figures 1A, Figure S2) and the autosomes (Figures 1B, Figure S3). For  
261 the X chromosome, *Treemix* found 2 admixture events within *D. yakuba* and none  
262 between species. The first event goes from the lowlands of São Tomé to the African  
263 mainland (weight = 0.21) and the second from the lowlands of São Tomé to the  
264 islands of Príncipe and Bioko (weight=0.046). For the autosomes, *Treemix* found  
265 evidence of 4 migration events, one of them between populations of *D. yakuba*  
266 (weight = 0.375), the other three events between species. One of these events  
267 indicates gene flow from *D. yakuba* on the islands of Príncipe and Bioko to *D.*

268 *santomea* (weight=0.104), the second from *D. santomea* to mainland *D. yakuba*  
269 (weight = 0.08), and the third from *D. teissieri* to *D. yakuba* at the hybrid zone (with  
270 *D. santomea*) on São Tomé (weight = 0.005). These results suggest that there has  
271 been introgression between the species in the *yakuba* complex. They also suggest  
272 that introgression is more likely to occur on the autosomes than on the *X*  
273 chromosome. Next, we explored the fine-scale patterns of introgression in the  
274 nuclear genomes of the three species.

275

## 276 **Linkage Disequilibrium**

277 Linkage disequilibrium decays rapidly in *D. melanogaster*:  $r^2$  decays to 0.2  
278 within 5,000bp ([35,60], but see [61,62]). Such rapid decay of LD seriously  
279 constrains the possibility of using long-range LD to detect admixture since most  
280 methods that use LD rely on identifying within population haplotype variation. The  
281 low levels of LD seen in *Drosophila* preclude identifying haplotypes thus preventing  
282 such methods from working properly. We evaluated whether similar patterns of LD  
283 decay exist in the three species of the *yakuba* species clade. We measured linkage  
284 disequilibrium (LD) for all three species in the *D. yakuba* clade using PLINK [73].  
285 For both the *X* chromosome and the autosomes, LD declined sharply at a scale of  
286 ~300bp before leveling off (Figure S4). At a distance of 1kb, the average  $r^2$  for *D.*  
287 *yakuba* was 0.0652 for the autosomes and 0.0464 for the *X* chromosome (Figure  
288 S4A), for *D. santomea* the average  $r^2$  was 0.1347 for the autosomes and 0.1518 for  
289 the *X* chromosome (Figure S4B), and for *D. teissieri* the average  $r^2$  was 0.1517 for  
290 the autosomes and 0.134 for the *X* chromosome (Figure S4C). This fast decay  
291 indicated the need to develop a framework to detect introgressed alleles that does  
292 not rely on LD.

293

## 294 **Identifying introgressed tracts**

295

296 (i) **Performance of the method: simulation results**

297

298

299 **Figure 2. Proportion of correctly identified simulated introgressions by Int-HMM.** The  
300 HMM successfully identified over 80% of introgressions longer than 10kb for all  
301 directions of introgression. It consistently performed better at identifying  
302 homozygous introgressions than heterozygous ones. Additionally, it identified  
303 higher percentages of introgressions between *D. yakuba* and *D. teissieri* than those  
304 between *D. yakuba* and *D. santomea*.  
305

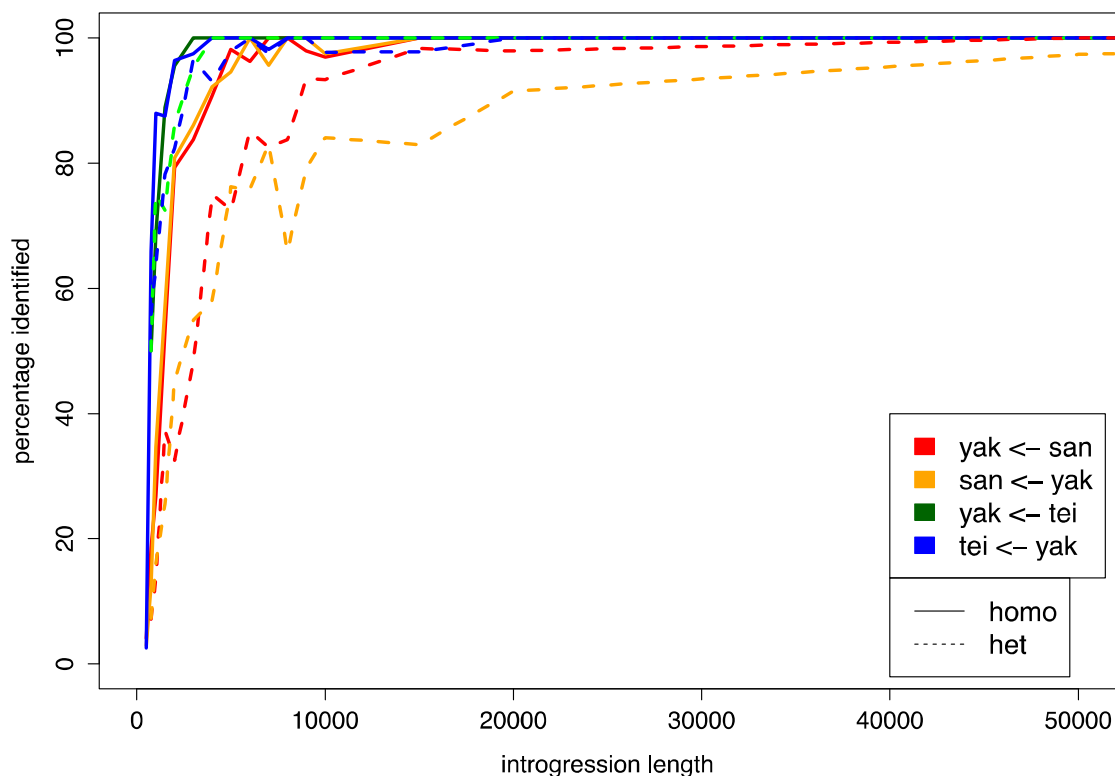

306  
307

308 We developed a Hidden Markov Model (HMM) to identify specific  
309 introgressed regions, Int-HMM. First, we determined the sensitivity of the method  
310 by assessing whether it could detect simulated introgressions. We simulated  
311 independent introgressions with sizes ranging from 100bp up to 100kb for both  
312 directions of gene flow in admixed genomes between *D. yakuba* and *D. santomea*  
313 and between *D. yakuba* and *D. teissieri* with some introgressed regions being  
314 homozygous and others heterozygous. Then, we used Int-HMM on the simulated  
315 data. We found that Int-HMM correctly identified a majority of introgressed regions

316 with the percentage of correctly identified introgressions increasing with the size of  
317 the introgressed region (Figure 2). Int-HMM is more reliable at identifying  
318 homozygous introgressions than heterozygous ones. For homozygous  
319 introgressions, the false negative rates were less than 10% for all introgression sizes  
320 greater than or equal to 4kb for introgressions between *D. yakuba* and *D. santomea*  
321 and 2kb for introgressions between *D. yakuba* and *D. teissieri*. For heterozygous  
322 introgressions, Int-HMM performed better with introgressions between *D. yakuba*  
323 and *D. teissieri* where the false negative rate was less than 10% for introgressions  
324 greater than or equal to 3kb. The rate did not drop to 10% for *D. yakuba* and *D.*  
325 *santomea* introgressions until the size was at least 15kb. The model likely performs  
326 less well for smaller regions due to a relative paucity of informative markers. False  
327 positive rates were negligible in all cases and were always less than 0.3% (Table  
328 S2).

329

## 330 (ii) HMM results

331

332 We identified the specific genomic regions that had introgressed from among  
333 species in the *yakuba* species complex. We looked for introgressed regions in both  
334 directions between *D. yakuba* and *D. santomea* (*san*-into-*yak*, *yak*-into-*san*) and  
335 between *D. yakuba* and *D. teissieri* (*tei*-into-*yak*, *yak*-into-*tei*) using the newly  
336 developed Int-HMM. The HMM was run individually on the genomic data from each  
337 genotype call (SNP) which had between 933,776 and 951,384 markers for *san*-into-  
338 *yak*, between 907,959 and 923,227 for *yak*-into-*san*, between 1,867,399 and  
339 1,888,413 markers for *tei*-into-*yak*, and between 2,275,453 and 2,468,955 markers  
340 for *yak*-into-*tei* (Table S1). On average the markers were separated by 127-133bp  
341 for *san*-into-*yak*, 131-133bp for *yak*-into-*san*, 64-65bp for *tei*-into-*yak*, and 49-53bp  
342 for *yak*-into-*tei*. The HMM returned a probability that each marker was either  
343 homozygous for the recipient species, heterozygous, or homozygous for the donor  
344 species; adjacent sites with identical, most-probable states were combined into  
345 tracts. We next describe the results for each species pair.

346

347 **Introgression tracts: *D. yakuba*/*D. santomea*.** *Drosophila yakuba* and *D. santomea*  
348 hybridize in the midlands of São Tomé and form a stable hybrid zone with the  
349 highest rate of hybridization known in *Drosophila*. We hypothesized that we would  
350 find a rate of introgression comparable with the rate of hybridization. Yet, and  
351 despite the continuous and ongoing hybridization between these two species, we  
352 found evidence that introgression at the genomic level is rare. Of the 17 *D. santomea*  
353 lines we assessed, on average 0.35% of the *D. santomea* genome was introgressed  
354 from *D. yakuba* with individual levels ranging from 0.1% (Qiuja630.39) up to 1.04%  
355 (san\_Field3) (Figure 3A, Table S3). The introgressions in the different lines covered  
356 different genomic regions, and cumulatively, they spanned 3.48% of the genome. We  
357 found comparable levels of introgression from *D. santomea* into *D. yakuba* with an  
358 average of 0.22% of the *D. yakuba* genome originating from *D. santomea*. Together,  
359 the introgressions across the 56 lines covered 5.56% of the genome. The magnitude  
360 of the introgressed genetic material varied almost two orders of magnitude across  
361 lines: individual levels ranged from 0.012% (3\_16) up to 1.20% (Anton\_2\_Principe)  
362 (Figure 3A, Table S3).

363

364 **Figure 3. Percentage of genome introgressed between each species pair.** Percentage  
365 of the genome that was introgressed for each line as determined by the cumulative  
366 length of introgression tracts identified by Int-HMM. *D. yakuba* has been divided  
367 into geographical populations where 'ST: HZ' refers to the São Tomé hybrid zone  
368 and 'ST: Low' to the lowlands of São Tomé. **A)** *yak*-into-*san* and *san*-into-*yak*  
369 introgressions. **B)** *yak*-into-*tei* and *tei*-into-*yak* introgressions.

370

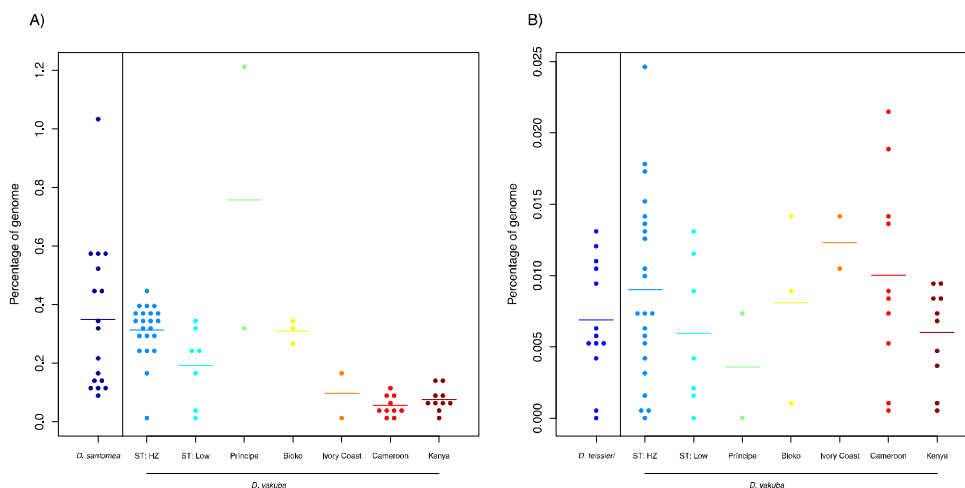

371

372

373 A majority of the introgressed regions were intronic (*san*-into-*yak*: 55.7%,  
374 *yak*-into-*san*: 49.3%) and intergenic (*san*-into-*yak*: 35.2%, *yak*-into-*san*: 43.1%)  
375 (Table S4). In the *san*-into-*yak* direction, the RNA coding regions (CDS, 3' prime  
376 UTR, and 5' prime UTR) are observed more than expected by chance. In the *yak*-  
377 into-*san*, 10kb inter and 3' prime UTR are more likely than random to be included in  
378 introgressions. Each type of sequence had similar marker densities; thus, it is  
379 unlikely that differences in read mapping affected these results (Table S4).

380 Next, we compared the magnitude of introgression for the two reciprocal  
381 directions of each cross. Globally, there was significantly more introgression from *D.*  
382 *yakuba* into *D. santomea* (Mann-Whitney U = 301, p= 0.0228), than from *D.*  
383 *santomea* into *D. yakuba*. Since *D. yakuba* has a geographic range that dwarfs that of  
384 *D. santomea*, we also repeated the species comparison excluding *D. yakuba* flies  
385 from Cameroon and Kenya, collection sites completely outside of *D. santomea*'s  
386 range. When only *D. yakuba* lines from near the Gulf of Guinea were included, levels  
387 of introgression were the same in both directions (Mann-Whitney U = 288, p=  
388 0.7413).

389 We next asked whether the magnitude of the *san*-into-*yak* introgression  
390 varied across *D. yakuba* lines from different locations. We found more introgression  
391 in *D. yakuba* flies collected within the hybrid zone with *D. santomea* (midlands of  
392 São Tomé; genomic average across individuals = 0.314%) than in flies collected on  
393 the island but at lower elevations outside of the hybrid zone (genomic average  
394 across individuals = 0.192%) (Mann-Whitney U = 123, p=0.018). Surprisingly, *D.*  
395 *yakuba* flies from the hybrid zone did not have more introgression than flies from  
396 the nearby islands of Bioko (Mann-Whitney U = 41, p=0.550) or Príncipe (Mann-  
397 Whitney U = 12, p=0.355).

398 We next analyzed the distribution of sizes of the haplotypes shared across  
399 the *yak/san* species boundary. The average tract size for the *D. yakuba* into *D.*  
400 *santomea* introgressions was 6.8kb with a maximum size of 112kb (Figure 4A). The  
401 average tract size for *D. santomea* into *D. yakuba* introgressions was 6kb with a  
402 maximum size of 959.5kb (Figure 4B). Interestingly, the 959.5KB tract was from a

403 line from the island of Príncipe where *D. santomea* is not known to currently exist  
404 (Figure S5). The next largest tract was 120.5kb and was seen in two lines from the  
405 hybrid zone on São Tomé (Cascade\_SN6\_1, Montecafe\_17\_17).

406  
407

408 **Figure 4. Introgression tracts are generally small.** Distributions of tract sizes. Note  
409 that tracts smaller than 500bp were not included in the analysis. **A) *san*-into-*yak*.**  
410 The distribution has been truncated to exclude a single large 959kb tract shown in  
411 Figure S5. **B) *san*-into-*yak*.** **C) *tei*-into-*yak*.** **D) *yak*-into-*tei*.**

412

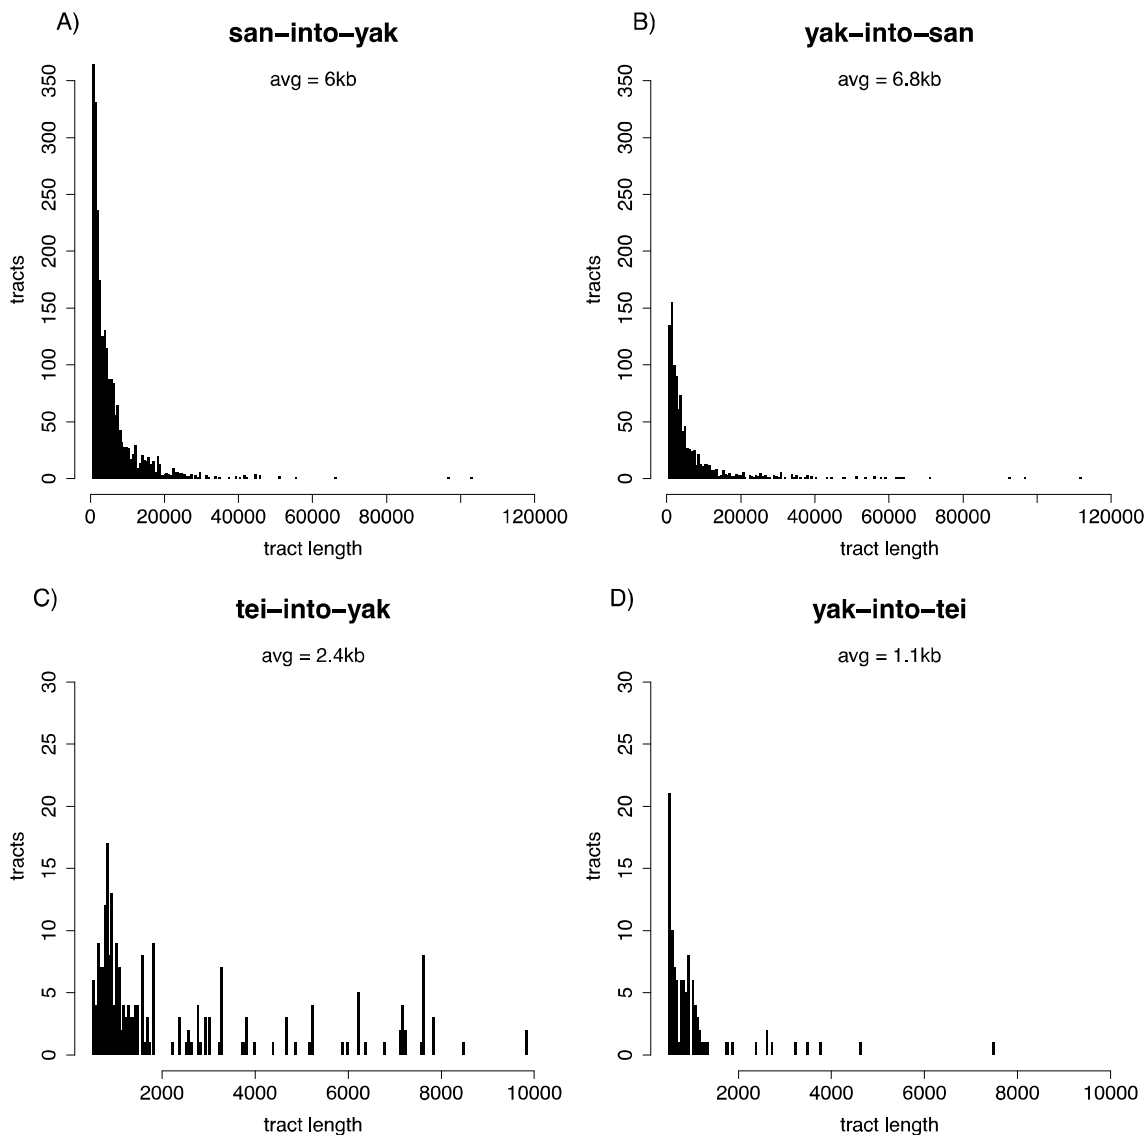

413  
414



415 **Introgression tracts: *D. yakuba*/*D. teissieri*.** *Drosophila yakuba* and *D. teissieri* also  
416 hybridize in the highlands of Bioko in a very narrow and geographically restricted  
417 hybrid zone [54]. As expected, given their divergence and the narrow hybrid zone,  
418 introgression from *D. yakuba* into *D. teissieri* (*yak*-into-*tei*) was rare. Among the 13  
419 *D. teissieri* lines, on average 0.0074% of the genome originated from *D. yakuba* with  
420 individual values ranging from 0% (Anton\_2\_Principe, Montecafe\_17\_17, SJ\_1) to  
421 0.0129% (Selinda) (Figure 3B, Table S3). Together the introgressions span 0.0669%  
422 of the genome. There was no difference in the amount of *yak*-into-*tei* introgression  
423 between the *D. teissieri* population on Bioko where a known hybrid zone is located  
424 and flies from outside Bioko (Mann-Whitney U=22, P = 0.826).

425 For the 56 *D. yakuba* lines, on average 0.0086% of the genome of the two  
426 species has crossed the species boundary. Individual percentages ranged from 0%  
427 (cascade\_2\_1) to 0.0244% (2\_8) (Figure 3B, Table S3). Collectively, the  
428 introgressions span 0.0914% of the genome. In the *tei*-into-*yak* direction the only  
429 type of region that shows an enrichment is 'introns', while in the reciprocal  
430 direction, *yak*-into-*tei*, both intergenic and intronic regions show an enrichment. As  
431 with the *yak/san* case, all type of sequences had similar markers densities (Table  
432 S4).

433 We also compared the magnitude of introgression in both directions. Similar  
434 to the hybrid zone between *yakuba* and *santomea*, we found no asymmetry in the  
435 amount of introgression between *D. yakuba* and *D. teissieri* (Mann-Whitney U =  
436 354.5, p= 0.5426). The *D. yakuba* lines with the highest levels of introgression from  
437 *D. teissieri* were from Cameroon and the *yak/san* hybrid zone on São Tomé (Figure  
438 3). Whereas *D. teissieri* is also present in Cameroon, this species (or its plant host  
439 *Parinari*) has never been collected on the island of São Tomé.

440 Finally, we assessed the distribution of sizes of the haplotypes shared across  
441 the *yak/tei* species boundary. The average tract size for *D. yakuba* into *D. teissieri*  
442 introgressions was 1.1kb with a maximum size of 7.5kb (Figure 4C). *Drosophila*  
443 *teissieri* into *D. yakuba* introgressions were larger than those in the reciprocal cross  
444 with an average of 2.4kb and a maximum size of 9.8kb (Figure 4D). The amount of

445 exchanged genetic material was larger in the latter direction of the cross (Mann-  
446 Whitney U = 17,034, P =  $5.37 \times 10^{-13}$ ).

447

448 **Figure 5. Most introgressions are present at low frequencies.** Frequencies of  
449 introgressed regions defined as inclusive sets of overlapping individual  
450 introgressions. A) *san*-into-*yak*. B) *yak*-into-*san*. C) *tei*-into-*yak*. D) *yak*-into-*tei*.  
451

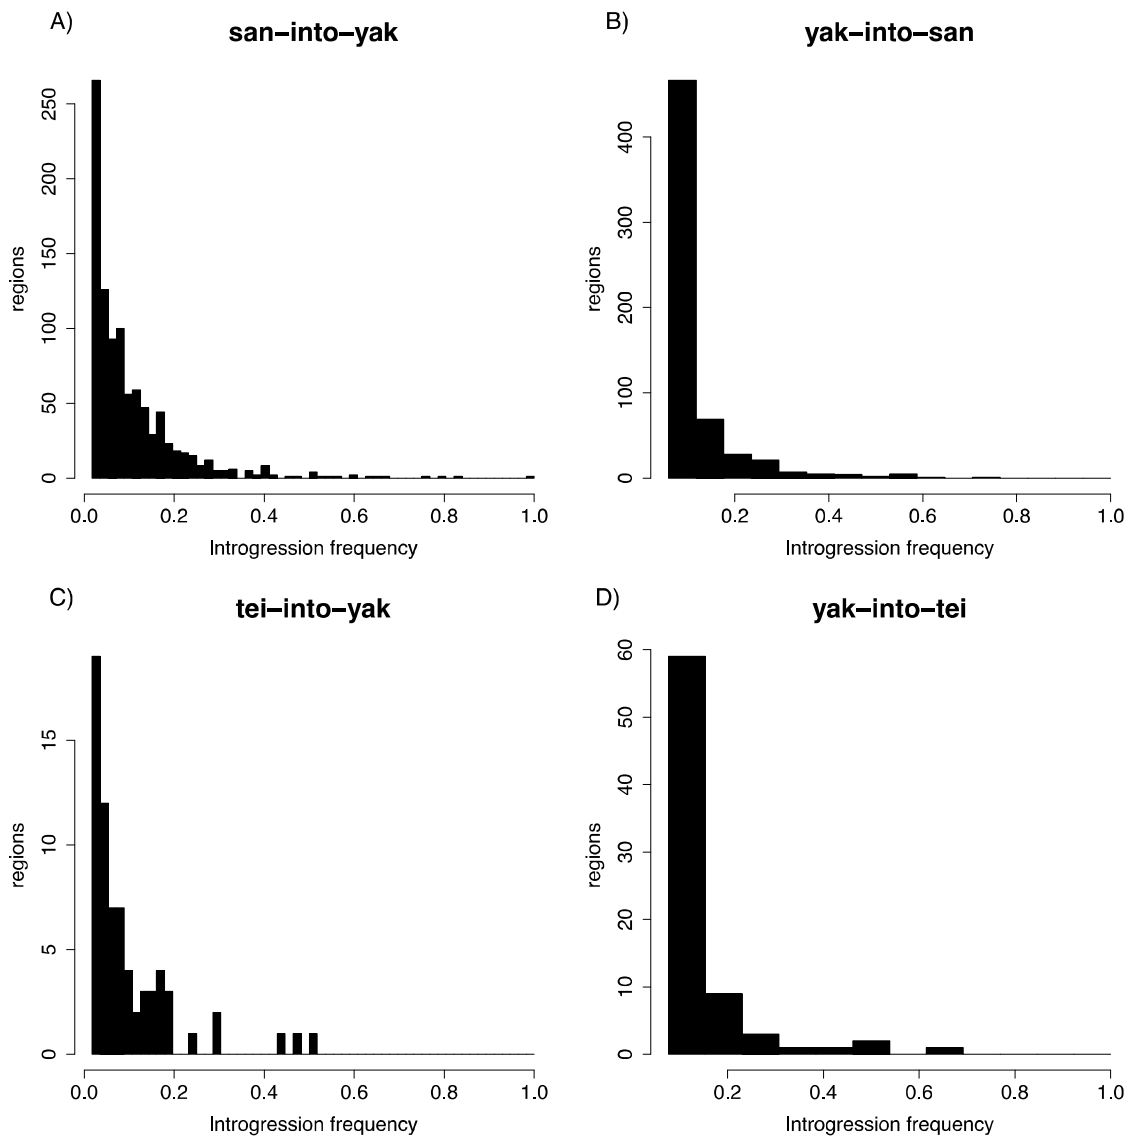

452  
453

454 **Species pair comparisons.** Since the split between *D. yakuba* and *D. santomea*  
455 occurred much more recently than that between *D. teissieri* and *D. yakuba*, fewer  
456 genetic incompatibilities will have evolved. Selection will purge alleles linked with

457 those negatively selected alleles. Thus, we expected to find more introgression  
458 between *D. yakuba* and *D. santomea* than between *D. yakuba* and *D. teissieri*. Indeed,  
459 there was significantly more *san*-into-*yak* than *tei*-into-*yak* introgression (Mann-  
460 Whitney  $U = 44$ ,  $P < 1 \times 10^{-15}$ ) and *yak*-into-*san* than *yak*-into-*tei* introgression  
461 (Mann-Whitney  $U = 0$ ,  $P = 6.96 \times 10^{-6}$ ).  
462

463 **Figure 6. Genomic distributions of introgression tracts.** Centromeres are denoted by  
464 rectangles in the center of chromosomes 2 and 3. **A) *san*-into-*yak*.** **B) *yak*-into-*san*.**  
465 **C) *tei*-into-*yak*.** **D) *yak*-into-*tei*.**  
466

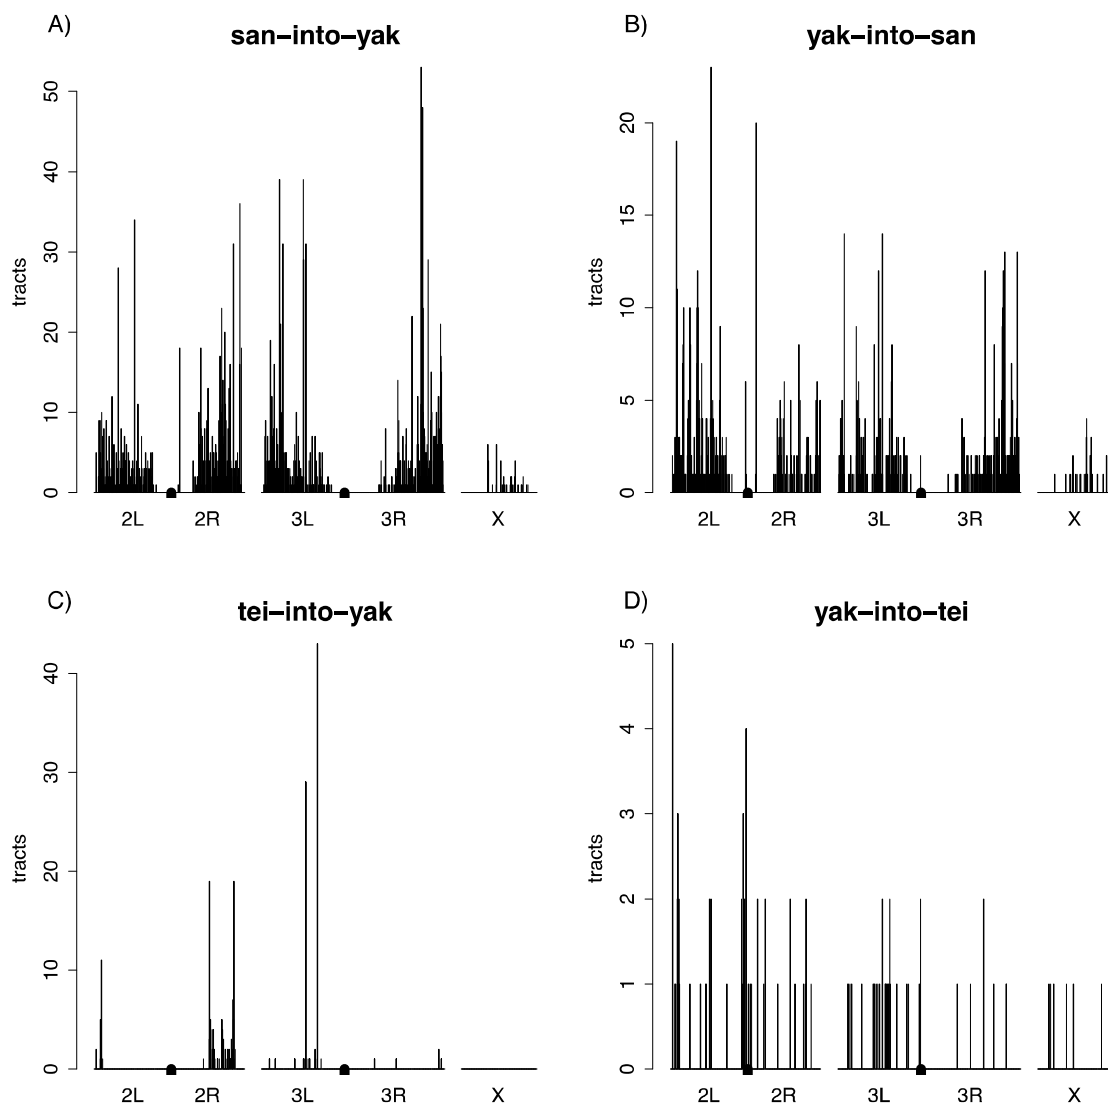

467

468           There are several similarities in the patterns of introgression in the two  
469 species pairs. First, in all four cross directions, introgressions were present at low  
470 frequencies (Figure 5). The average frequencies were 11.1% (*san*-into-*yak*), 11.8%  
471 (*yak*-into-*san*), 10.8% (*tei*-into-*yak*), and 15.1% (*yak*-into-*tei*).

472           Second, for both species pairs, introgression tracts were not uniformly  
473 distributed across the genome (Figure 6). We observed less introgression on the *X*  
474 chromosome than on autosomes in all four directions (permutation tests; *san*-into-  
475 *yak*:  $P < 0.0001$ , *yak*-into-*san*:  $P < 0.0001$ , *tei*-into-*yak*:  $P < 0.0001$ , *yak*-into-*tei*:  $P =$   
476  $0.0198$ ; Figure S6). Intriguingly, a region at the start of the *X* chromosome where we  
477 did not find any *san*-into-*yak* introgression and limited *yak*-into-*san* introgression  
478 corresponds with a QTL implicated in hybrid male sterility between the two species  
479 [48]. Finally, we not only found less *X*-linked introgression, but introgressed tracts  
480 were also shorter on the *X* chromosome than on the autosomes: 3.16kb versus 6.05  
481 kb (*san*-into-*yak*), 3.34kb versus 6.9kb (*yak*-into-*san*), and 0.87kb versus 1.08kb  
482 (*yak*-into-*tei*). Notably, we did not find any *X*-linked introgressions for *tei*-into-*yak*.

483

#### 484 **Dating introgression**

485           The percentage of the genome containing introgressions and the size  
486 distribution of introgression tracts within a population contain information on the  
487 timing and rates of historic introgression. The size of introgressions we observed  
488 are surprisingly small given the stable nature of the two hybrid zones, and the  
489 observation of hybrid individuals in nature. These pattern suggest that, despite low  
490 levels of hybridization, introgression is old because recombination has broken down  
491 introgressed regions over time. To obtain a rough estimate of the age of  
492 introgression, we used the program SELAM [74]. Modeling all of the potential  
493 demographic and introgression histories would be beyond the scope of this paper.  
494 Instead we modeled the simplest hybridization with introgression scenario: a single  
495 generation pulse of introgression (i.e., hybrids are formed only once). We recorded  
496 the size of the resulting introgression tracts from 50 individuals for 10,000  
497 generations under four different models (i.e., magnitude of the hybridization event).  
498 We ran five independent simulations each for initial migration rates  $m = 0.0001$ ,

499 0.001, 0.01, and 0.1. We found that the percentage of the genome containing  
500 introgressed tracts declined to levels observed between *D. yakuba* and *D. santomea*  
501 within 100-300 generations for  $m = 0.0001$ , 100-200 generations for  $m = 0.001$ ,  
502 200 generations for  $m = 0.01$ , and 200 generations for  $m = 0.1$  (Figure S7).  
503 Simulated percentages fell to levels seen between *D. yakuba* and *D. teissieri* within  
504 1,600 to 8,100 generations for  $m = 0.0001$ , 5,800-6,900 generations for  $m = 0.001$ ,  
505 6,800-7,800 generations for  $m = 0.01$ , and 7,800-8,000 generations for  $m = 0.1$   
506 (Figure S7). The average length of introgressed tracts shrunk to levels seen between  
507 *D. yakuba* and *D. santomea* within 1,700-6,200 generations with two runs never  
508 decreasing as much for  $m = 0.0001$ , 7,900-9,800 generations for  $m = 0.001$ , 10,000  
509 generations with four runs never decreasing as much for  $m = 0.01$ , and no runs  
510 decreasing as much for  $m = 0.1$  (Figure S8). The average length decreased to levels  
511 seen between *D. yakuba* and *D. teissieri* within 2,700 generations with four runs  
512 never decreasing as much for  $m = 0.0001$  and no runs decreasing as much for  $m =$   
513  $0.001$ ,  $0.01$ , or  $0.1$  (Figure S8). The small average length of observed tracts,  
514 therefore, suggests that introgression may be old and the original rate of gene flow  
515 ( $m$ ; assuming a single pulse of introgression) was low.

516

### 517 **Ancestral variation**

518 Shared genetic variation between species could result from introgression but  
519 may also represent genetic variation present prior to speciation that is still  
520 segregating in both species (i.e., incomplete lineage sorting; [75,76]). To assess how  
521 likely this scenario was, we looked at the expected number of generations after  
522 speciation before ancestral variation was lost and the expected size distribution of  
523 ancestral haplotypes. The number of generations before a neutral allele segregating  
524 in the ancestral population is lost is 39,800 generations for  $N_e=10^4$  and 3,979,933  
525 generations for  $N_e=10^6$  (Figures S10A-B, S11A-B). (This of course does not account  
526 for trans-specific balancing selection.) We estimated the divergence time between  
527 *D. yakuba* and *D. santomea* to be 1 million years (MY) and between *D. yakuba* and *D.*  
528 *teissieri* to be 2.6MY. We then estimated the number of generations since *D. yakuba*  
529 and *D. santomea* diverged to be  $26.1 \times 10^6$ ,  $17.4 \times 10^6$  and  $13.0 \times 10^6$  generations

530 respectively for generation lengths of 14, 21, and 28 days and  $67.8 \times 10^6$ ,  $45.2 \times$   
531  $10^6$ , and  $33.9 \times 10^6$  generations respectively for *D. yakuba* and *D. teissieri*. All of the  
532 estimates are much older than the  $\sim 4$  million generations that a SNP is expected to  
533 remain polymorphic (Figures S10A-B, S11A-B). It is, therefore, unlikely that the  
534 regions of shared ancestry represent ancestral polymorphism and are much more  
535 likely to represent introgressed regions. Furthermore, the tracts we identify need to  
536 contain at least 10 putatively introgressed SNPs, and the probability of  
537 independently observing so many in a row is small. These results strongly argue  
538 against ancestral polymorphism occurring in any of the two species pairs.

539         However, an introgressed fragment could be an ancestral haplotype block  
540 that is still segregating in only one of the species. If this is the case, recombination  
541 will break down ancestral haplotypes over time. We next looked at the expected  
542 distribution of fragment lengths that would still be segregating and are derived from  
543 the ancestral species. Between *D. yakuba* and *D. santomea* the 99<sup>th</sup> quantiles for  
544 expected fragment lengths assuming a divergence time of 1 MY and generation  
545 lengths of 14, 21, and 28 days were 12bp, 19bp, and 24bp respectively (Figure S9C-  
546 E). Assuming a divergence time of 2.6 MY (as estimated above), the respective 99<sup>th</sup>  
547 quantiles for *D. yakuba* and *D. teissieri* were 7bp, 9bp, and 10bp (Figure S10). All of  
548 these expected lengths are much smaller than our cutoff of 500bp and observed  
549 means of 6.0kb for *san*-into-*yak*, 6.8kb for *yak*-into-*san*, 2.4kb for *tei*-into-*yak*, and  
550 1.1kb for *yak*-into-*tei*. Collectively given the small expected fragment sizes and large  
551 number of generations since ancestral polymorphism would be expected to have  
552 been lost from the recipient species make it unlikely that the introgression tracts we  
553 found are actually ancestral variation.

554

### 555 **Adaptive introgression**

556         Finally, we explored the possibility of introgressions that had become fixed in  
557 the recipient population. We looked for introgressions that were fixed in a  
558 population within the hybrid zone but not present in allopatric populations. We  
559 found no evidence of *san*-into-*yak* introgressions that have completely swept locally  
560 to fixation within the hybrid zone on São Tomé. We did identify three regions that

561 had introgressions present in the majority of individuals from the hybrid zone (i.e.,  
562 with frequencies greater than or equal to 50% Figures S11-S13). The first one, 2R:  
563 19,918,908-19,927,758, is 8.9kb long, is at 50-54.6% frequency, and contains four  
564 genes (eEF5, *RpL12*, *CG13563* and the promoter and 5' region of *ppk29*, Figure  
565 S11). The second introgression, 3L: 6,225,896-6,257,088, is 31.2kb and is at 50%  
566 frequency. It contains three genes: two genes with no orthologs in *D. melanogaster*  
567 (*FBgn0276401*, and *FBgn0276736*) and *Sif*(Figure S12). The last of the three  
568 introgressions at high frequency in the hybrid zone, 3L: 12,187,525-12,209,675, is  
569 22.2kb and is at 59.1-68.2% frequency (depending on the introgression block); it  
570 includes three genes: *CG9760*, *Rh7*, and the 3' portion of *Neurexin IV*(Figure S13).  
571 Their multiple breakpoints suggest these introgressions have been segregating  
572 within *D. yakuba* long enough for multiple independent recombination events to act.

573 We did not do a similar analysis at the *D. yakuba/D. teissieri* hybrid zone  
574 because we only had three *D. yakuba* individuals for that population.

575  
576  
577

## DISCUSSION

578 We found evidence for low levels of introgression between the three species  
579 in the *D. yakuba* clade which contains the two only known stable hybrid zones in the  
580 *Drosophila* genus. We hypothesized that given ongoing hybridization, we would find  
581 high levels of genetic exchange between the two species pairs. Yet, in both hybrid  
582 zones, the introgressed regions of the genome are small and generally present at  
583 low frequencies. Given the divergence time between the two species and low levels  
584 of linkage disequilibrium for the three species (Figure S4), the blocks of shared  
585 ancestry are unlikely to represent incomplete lineage sorting and instead reflect  
586 introgression. Given their small sizes, low frequencies, and non-consistent  
587 enrichment for a type of sequence, it is likely that a majority of the introgressed  
588 regions are selectively neutral. Since the results for the two pairs of species differ  
589 quantitatively and qualitatively, we discuss them separately.

590

591 *yak/san*

592 Int-HMM detected low levels of introgression between *D. yakuba* and *D.*  
593 *santomea*; average levels of introgression are around 0.4% and never exceed 1.2%.  
594 Introgressed fragments are generally small, with average sizes of 6.8kb for *yak*-into-  
595 *san* and 6kb for *san*-into-*yak* suggesting recombination has reduced their size over  
596 multiple generations and implying that the introgressions are not recent.

597 Introgression must have occurred through hybrid females (who are fertile),  
598 as hybrid males are sterile. Introgression also must have originated in the hybrid  
599 zone in an area of secondary contact, likely the midlands of São Tomé, and  
600 subsequently spread into other areas.

601 Notably, *san*-into-*yak* introgressed tracts are not limited to São Tomé. We  
602 also found introgressed *D. santomea* alleles in *D. yakuba* lines from other islands in  
603 the Gulf of Guinea that are far from the hybrid zone on São Tomé (over 150km).  
604 There are two possible explanations for this distribution. First, gene flow within *D.*  
605 *yakuba* between islands in the Gulf of Guinea might be common allowing  
606 introgressions to easily spread throughout the archipelago. However, there is some  
607 evidence of genotypic and phenotypic differentiation between different *D. yakuba*  
608 populations [44]. The second possibility is that *D. santomea* is not endemic to São  
609 Tomé but is (or once was) present on other islands in the Gulf of Guinea. Sampling  
610 on the islands of Príncipe [39] and Bioko [41,54,77], has not yielded *D. santomea*  
611 collections. It is worth noting however, that these collections only inform the  
612 current distribution of *D. santomea* and not its historical range. Regardless of the  
613 explanation, introgression between these two species pairs is limited and likely to  
614 be ancient.

615

#### 616 *yak/tei*

617 Also using Int-HMM, we found evidence for introgression between *D. yakuba*  
618 and *D. teissieri*, two highly divergent species ( $K_s \sim 11\%$ ). Average levels of  
619 introgression are around 0.005% and never exceed 0.025% (i.e., much lower than  
620 between *D. yakuba* and *D. santomea*). Most introgressions between these species  
621 are small and have low allelic frequencies. The average tract size for *D. yakuba* into  
622 *D. teissieri* introgressions was also smaller than between *D. yakuba* and *D. santomea*



623 (1.1kb and 2.4kb depending on the direction of the introgression). Introgression  
624 between these species is asymmetric with higher rates from *D. yakuba* into *D.*  
625 *teissieri* than in the reciprocal direction. The reasons behind this asymmetry are  
626 unclear but do not stem from differences in the magnitude of reproductive isolation  
627 between the two directions of the cross [57]. Notably, *D. teissieri* flies from the  
628 hybrid zone on Bioko had some of the highest levels of introgression of all *D.*  
629 *teissieri* lines. A similar pattern did not hold for *D. yakuba*, as multiple populations  
630 of *D. yakuba* show similar levels of introgression. We observed a similar pattern for  
631 the *yak/san* pair: *D. yakuba* does not show differences in the magnitude of  
632 introgression at different locations.

633 *Drosophila yakuba* and *D. teissieri* coexist over large swaths of the African  
634 continent [53], and thus it is unclear—yet likely—whether other hybrid zones exist.  
635 These results are not explained by different rates of migration between *D. yakuba*  
636 and *D. teissieri* as they tend to move similar distances [54].

637 Moreover, we find that introgression from *D. teissieri* is present in all lines of  
638 *D. yakuba*, including those from the island of São Tomé. These results might indicate  
639 that the colonization of *D. yakuba* to São Tomé occurred after hybridization between  
640 *D. yakuba* and *D. teissieri* and the genomes of the colonizing *D. yakuba* flies already  
641 contained introgressions from *D. teissieri*. Currently there are no *D. teissieri* on São  
642 Tomé and there is no record of *Parinari* (the main substrate of *D. teissieri*) on this  
643 island either. We cannot infer the ancestral range of *D. teissieri* with certainty, but it  
644 seems unlikely that this species was present on this island. Notably, *tei*-into-*yak*  
645 introgressions do not overlap with the *san*-into-*yak* introgressions we observed.  
646 This rules out the possibility that putative *tei*-into-*yak* introgressions in the hybrid  
647 zone actually are from *D. santomea*.

648

#### 649 ***General patterns from both species pairs.***

650 Introgression in both species pairs shows that despite strong reproductive  
651 isolating barriers, genetic exchange mediated through hybridization is possible in  
652 *Drosophila*. In total, over 15 barriers to gene flow have been reported between *D.*

653 *yakuba*, *D. santomea*, and *D. teissieri* [46,50,57,78,79]. Females invariably prefer  
654 males from the same species, and interspecific matings are rare [46] but see [80].  
655 Interactions between gametes from the three different species can also go awry  
656 precluding fertilization [57,77,81]. Hybrid individuals may also be inviable or show  
657 behavioral defects. Hybrid males from all interspecific crosses are sterile [38,57].  
658 This wide variety of phenotypes is expected to reduce the amount of introgression  
659 between species pairs.

660 The introgressions we found in all four directions appear to be primarily  
661 selectively neutral (but see below). They were generally small, being on average  
662 only a few kilobases long, indicating that they had been present in the recipient  
663 species for many generations, and recombination had ample time to reduce their  
664 size. If these introgressions were ubiquitously beneficial, they would have been  
665 swept to fixation across the full geographic range or at least in local populations. We  
666 only found a handful of cases where the frequency of introgressed segments  
667 exceeded 50%, and most of the introgressions we did find were at low frequencies  
668 as expected under neutral drift.

669 We also addressed whether introgressions were uniformly distributed across  
670 the genome. Theoretical models [69] have argued that in species with a hemizygous  
671 sex, sex chromosomes should have lower rates of introgression than autosomes. In  
672 *Drosophila*, the *X* chromosome plays a large role in reproductive isolation [82-83].  
673 The hemizyosity of the *X* chromosomes means that recessive alleles that are  
674 deleterious in an admixed genomic background will manifest their deleterious  
675 phenotype in males (whereas an autosomal allele would manifest such a phenotype  
676 only when homozygous) [82-86]. Reduced introgression on the *X* chromosome has  
677 been found in the *Drosophila simulans* clade [8], in hominids [28,87], and in other  
678 mammals [88-90]. Our results support this hypothesis. We saw less introgression on  
679 the *X* chromosome in agreement with the large *X* effect [91-93]. Such an effect has  
680 also been observed in the *yakuba* species complex [48,94].

681 Our SELAM results suggest that the percentage of the genome containing  
682 introgression can decline quickly after a single generation of introgression reaching  
683 the 0.35% seen between *D. santomea* and *D. yakuba* within 100 to 200 generations.

684 This would imply that the introgression was relatively recent. However, the small  
685 average introgression sizes that we observe would suggest otherwise. The average  
686 tract lengths from the SELAM simulations indicate that thousands of generations are  
687 necessary for the average tract size to reach the 6.8kb we see for *yak-into-san*. We  
688 recognize that a single generation of introgression may not properly model the  
689 introgression history within the *D. yakuba* clade, but it provides a rough  
690 approximation. Existing models for estimating the magnitude and timing of  
691 admixture based on tract sizes do not perform well for old admixture events  
692 involving small tracts and when recombination has occurred between admixed  
693 fragments [30,95-97]. Our simulations also assume that introgressed alleles are  
694 selectively neutral, which is unlikely to be true between such highly diverged  
695 species, but modeling the genomic distributions of hybrid incompatibilities and  
696 their interactions is beyond the scope of this study.

697

### 698 ***Hybridization vs introgression***

699 Our results pose an apparent contradiction. We studied the only two stable  
700 hybrid zones known to date in *Drosophila*. Additionally, there seems to have been a  
701 recent event of mitochondrial homogenization in these species that can only be  
702 explained through hybridization [37,39,56,58]. Yet, we find little introgression  
703 between hybridizing species in both cases. How to reconcile the continuous and  
704 relatively high level of hybridization with the small amount of observed genomic  
705 introgression that seems to be old? *Drosophila yakuba* and *D. teissieri* hybridize in  
706 the island of Bioko but the hybrid zone they form is extremely narrow indicating  
707 strong selection against the hybrids. Field and laboratory experiments revealed the  
708 potential source of this selection: *D. yakuba* prefers open habitats while *D. teissieri*  
709 prefers dense forests. Congruently, *D. yakuba* is able to tolerate desiccating  
710 conditions, while *D. teissieri* is not well suited for this type of stress. F1 hybrids  
711 between these two species show a deleterious combination of traits; while they  
712 prefer open habitats like *D. yakuba*, they cannot tolerate osmotic stress. This  
713 maladaptive combination of traits might preclude the possibility of these hybrids

714 passing genes to the next generation. Indeed, while hybrids may be sampled on  
715 Bioko, no advanced-generation hybrid genotypes have been found [54].

716 The case of *D. yakuba* and *D. santomea* is more puzzling because the number  
717 of hybrids produced in their hybrid zone is much higher [44]. One possible scenario  
718 is that there is also strong selection against the hybrids and they simply are not able  
719 to reproduce. At least one line of evidence indicates this is the case. Hybrid males in  
720 the *yak/san* hybrid zone from one of the directions of the cross migrate towards the  
721 top of Pico de São Tomé largely outside of the geographic range of the two parental  
722 species. These males are sterile, but hybrid females, which are fertile, might show  
723 similar defects. There is evidence that hybrids from both sexes show behavioral  
724 defects [98]. The reason for this aberrant migration is unknown, but is likely to be  
725 caused by similar behavioral defects.

726 A second factor that might have diminished the possibility of contemporary  
727 gene exchange between these two species is the evolution of postmating prezygotic  
728 isolation by reinforcing selection [77]. *Drosophila yakuba* females from the hybrid  
729 zone show stronger gametic isolation towards *D. santomea* than females from other  
730 regions which might contribute to the reduction in the production of hybrids.  
731 Notably reinforced reproductive isolation evolves in just a few generations of  
732 experimental sympatry [77,99] and can evolve even in the face of gene flow [100].  
733 Such strengthened reproductive isolation might explain the levels of introgressions  
734 we observe in the *yak/san* hybrid zone: a combination of stronger prezygotic  
735 isolation (evolved via reinforcement) and strong selection against F1 hybrids, would  
736 lead to high rates of hybridization and little introgression. The observed levels of  
737 introgression might be a relic of even higher levels of hybridization before  
738 reinforced gametic isolation was in place.

739

#### 740 **Adaptive introgression**

741 The vast majority of introgressions were at low frequency, but we tested  
742 whether any of the alleles identified in our screen showed evidence of adaptive  
743 introgression. We find potential evidence for three alleles that have increased in  
744 frequency locally (i.e., in the São Tomé hybrid zone; [101]) after crossing the species

745 boundary from *D. santomea* or from *D. teissieri* into *D. yakuba*. It is worth noting  
746 that given their size and the rather large number of breakpoints, these  
747 introgressions are unlikely to have entered *D. yakuba* in the recent past.

748 We found three *san*-into-*yak* introgressions that increased to high frequency  
749 in the hybrid zone. The first one, 2R: 19,918,908-19,927,758, contains four genes:  
750 *eIF5*, *RpL2*, *CG13563*, and the 5' portion of *ppk29*. The most intriguing of these  
751 candidates is *ppk29* because the gene is involved in intraspecific male-male  
752 aggression in *D. melanogaster* [102], and larval social behavior also in *D.*  
753 *melanogaster* [103]. *ppk29* is also necessary for promoting courtship to females  
754 [104] and inhibit courtship towards males [104].

755 The second *san*-into-*yak* introgression, 3L: 6,225,896-6,257,088, contains a  
756 portion of the intron of *Sif* and two genes with no known orthologs in *D.*  
757 *melanogaster* (*GE28246*, *GE28581*). *Sif* is differentially expressed after light  
758 stimulation, and functional analyses in *D. melanogaster* show a strong effect of the  
759 gene on the regulation of circadian rhythm [105]. Surprisingly, knockdowns of *Sif* in  
760 projection neurons result in changes in odor-guided behavior: mutants are more  
761 attracted to fermenting fruit [106,107]. Other effects of the gene show that it is  
762 implicated in resistance to fungal pathogens [108].

763 The final *san*-into-*yak* introgression at high frequency in the hybrid zone,  
764 3L:12,187,525-12,209,675, contains three genes: *Nrx-IV*, *CG9760*, and *Rh7*. *Nrx-IV*  
765 human orthologs (*CHRNA5*, *CHRNA7*) have been implicated in alcohol dependence  
766 and natural intronic polymorphism segregating within *D. melanogaster* has been  
767 associated with resistance to alcohol [109]. It has also been associated with  
768 resistance to fungal pathogens [108]. *Rh7* is a rhodopsin that has been implicated in  
769 fly vision and regulation of circadian rhythm and light perception [110].

770 These three introgressions contain genes that could potentially be involved  
771 in adaptation, but we cannot yet claim that these alleles are adaptively introgressed.  
772 More generally, we do not yet know whether any of these genes leads to  
773 interspecific trait differences. Only careful physiological and functional study of  
774 potentially adaptive phenotypes in the three pure species and the admixed  
775 individuals will reveal to what extent these introgressed regions are truly adaptive.

776

## 777 **Caveats**

778           Our approach is not devoid of caveats. First, we sequenced individuals from  
779 isofemale lines. These lines are derived from a single inseminated female and over  
780 time their progeny will lose heterozygosity quickly [111,112]. This means that our  
781 assessment of gene exchange might be warped by this inbreeding step. On one hand,  
782 inbreeding leads to homozygote flies and deleterious introgressions will be more  
783 likely to be lost from the sample. On the other hand, if inbred flies are introgression  
784 carriers and homozygous, we will be able to detect introgression in a more reliable  
785 manner. A systematic sequencing of flies directly collected from the field will reveal  
786 whether the use of isofemale lines does indeed mislead the quantification of  
787 introgression.

788           Second, all our analyses were done using a *D. yakuba* reference genome. The  
789 greater divergence between *D. yakuba* and *D. teissieri* may also result in less ability  
790 to map *D. teissieri* reads in less conserved regions such as intergenic sequence thus  
791 causing us to miss introgressions.

792           Third, beneficial alleles would likely go to fixation quickly and would be  
793 undetectable by our approach since both species would have the same allele.  
794 Additionally, such adaptive introgressions that have swept to fixation could cause  
795 our method to misidentify the direction of introgression. We find evidence for three  
796 potential cases of adaptive introgressions (not fixed but at high frequency in the  
797 hybrid zone) but we do not believe that such instances are common. Most genes are  
798 unlikely to be adaptive in a new genomic environment [113-115]. Since linkage  
799 disequilibrium declines precipitously on the order of a few hundred base pairs in  
800 the *Drosophila* species we are working with and the minimum size for introgression  
801 tracts we are reporting is 500bp, misidentified adaptive introgressions should be  
802 very rare in our dataset. A demographic assessment of the timing and likely  
803 evolutionary history of these introgressions might help resolve the issue.

804           Fourth, we selected markers that were fixed in the donor species with an  
805 allele frequency difference between species greater than 0.3. This cutoff was chosen  
806 because the closer the allele frequency difference is to zero, the less information the

807 marker contains. However, in practice this means that we were unable to detect  
808 introgressions that had increased in the recipient species to frequencies greater  
809 than 0.7. Given the distribution of allele frequencies we observed, it seems unlikely  
810 that there are many introgressions at such high frequencies, but we would be unable  
811 to detect those that existed. Given the small differences between species, such  
812 introgressions could be difficult to detect for any method, particularly one based on  
813 allele frequencies.

814 Our approach is also unable to detect regions of the genome with  
815 bidirectional introgression. However, given the low levels of introgression we  
816 observe (< 1%) and the small sizes of introgression tracts, such overlaps are  
817 expected to be rare. A final, and related potential caveat would be that  
818 introgressions in *D. yakuba* were attributed separately to both *D. santomea* and *D.*  
819 *teissieri*. However, there is a little overlap between *san*-into-*yak* and *tei*-into-*yak*  
820 introgressions with only two lines (1\_5 and 1\_7) each having the same overlap  
821 which spans just 2,439bp.

822

## 823 **Conclusions**

824 Hybridization is common across the tree of life. Hundreds of hybrid zones  
825 have been described over the last 150 years [116-119] but until recently identifying  
826 the segments of the genome that had crossed species boundaries was all but  
827 impossible. Genome sequencing has been able to identify multiple cases of recent  
828 admixture and introgression [19,120-123]. Large pieces of the genome in modern  
829 humans originated from other hominids [29,31,115,120,124-126]. Hybridization in  
830 plants is rampant and has had deep implications in their diversification [127-130].  
831 Systematic surveys in birds also have provided evidence that hybridization and  
832 introgression might be frequent but not ubiquitous processes ([131-133] reviewed  
833 in [134,135]). Overall, there is strong evidence that hybridization is common across  
834 animals [13,136,137], and there are clues that introgression might not be rare  
835 [19,138]. Significant progress has been made to detect introgression when  
836 migration is recent [24,139]. Ancient introgression remains a largely underexplored  
837 question because identifying small introgressions is challenging (but see

838 [28,33,87]). We provide a general method to detect introgression that does not  
839 depend on having phased data or on identifying pure individuals beforehand.  
840 Additionally, our method reliably identifies introgressions even when introgression  
841 is rare. We have mapped such introgressions between two pairs of species in the  
842 *Drosophila yakuba* clade and found minimal genomic introgression despite the  
843 existence of stable hybrid zones and ongoing hybridization. Our results indicate that  
844 hybridization does not necessarily imply gene flow between species. The two  
845 species pairs in the *yakuba* clade likely represent the later stages of the speciation  
846 process and similar mapping efforts are necessary in species pairs that are less  
847 diverged to better understand how divergence time affects rates of hybridization  
848 and subsequent genomic introgression.  
849  
850



## 851 **METHODS**

852

### 853 **Genome sequencing**

854

#### 855 **Fly Collection**

856 *Drosophila* lines were collected in the islands of São Tomé and Bioko. To  
857 collect flies, we set up banana traps in plastic bottles hanging from trees. Flies were  
858 aspirated from the traps without anesthesia using a putter [140,141]. Flies were then  
859 sorted by sex and species. Males were kept in RNAlater; females were individually  
860 placed in 10mL plastic vials with instant potato food (Carolina Biologicals,  
861 Burlington, NC). Propionic acid and a pupation substrate (Kimwipes Delicate Tasks,  
862 Irving TX) were added to each vial. We collected the progeny from each female and  
863 established isofemale lines [140]. All collected stocks and populations were reared  
864 on standard cornmeal/Karo/agar medium at 24°C under a 12 h light/dark cycle.  
865 The taxonomical identification was confirmed by performing crosses with tester  
866 stocks (*D. santomea*: sanSYN2005; *D. yakuba*: Täi18; *D. teissieri*: Selinda). Other  
867 additional lines were donated by J.A. Coyne and are listed in Table S1. Figure S14  
868 indicates the number of fly lines used in this study from each geographic location.

869

#### 870 **DNA extraction**

871 DNA was extracted from single female flies using the QIAamp DNA Micro Kit  
872 (Qiagen, Chatsworth, CA, USA) kit. We followed the manufacturer's instruction using  
873 cut pipette tips to avoid shearing the DNA. This protocol yields on average ~40ng  
874 (range: 23ng-50ng) of DNA per fly per extraction.

875

#### 876 **Library Construction**

877 For short read sequencing, we constructed libraries following two methods.  
878 54 libraries were built using the TrueSeq Kappa protocol (University of North  
879 Carolina, Chapel Hill). For these libraries, ~10 ug of DNA was sonicated with a  
880 Covaris S220 to a mean fragment size of 160 bp (range = 120–200 bp) with the

881 program: 10% duty cycle; intensity 5; 100 cycles per burst; 6 cycles of 60 seconds in  
882 frequency sweeping mode. The other 12 libraries were built using Nextera kits at  
883 the sequencing facility of the University of Illinois, Urbana-Champaign. For these  
884 libraries, DNA was fragmented using Nextera kits which uses proprietary  
885 transposases to fragment DNA. Libraries were built following standard protocols  
886 [72].

887

## 888 Sequencing

889 We sequenced all libraries on Illumina HiSeq 2000 machines with v3.0  
890 chemistry following the manufacturer's instructions. Table S1 indicates the  
891 sequencing type (single-end or paired-end), and coverage for each library. Libraries  
892 were pooled prior to sequencing and 6 libraries were sequenced per lane. To assess  
893 the quality of the individual reads, the initial data was analyzed using the HiSeq  
894 Control Software 2.0.5 in combination with RTA 1.17.20.0 (real time analysis)  
895 performed the initial image analysis and base calling. Run statistics for each FASTQ  
896 file was generated with CASAVA-1.8.2. Resulting reads ranged from 100bp or 150bp  
897 and the target average coverage for each line was 30X. The coverages for each line  
898 are shown in Table S1. We obtained *D. yakuba* sequences for 20 previously  
899 sequenced lines (10 from Cameroon and 10 from Kenya) from [142] (Table S1).

900

## 901 Read mapping and variant calling

902 Reads were mapped to the *D. yakuba* genome version 1.04 [143] using bwa  
903 version 0.7.12 [144]. Bam files were merged using Samtools version 0.1.19 [145].  
904 Indels were identified and reads were locally remapped in the merged bam files  
905 using the GATK version 3.2-2 RealignerTargetCreator and IndelRealigner functions  
906 [146,147]. SNP genotyping was done using GATK UnifiedGenotyper with the  
907 parameter `het = 0.01`. The following filters were applied to the resulting vcf file: `QD`  
908 `= 2.0`, `FS_filter = 60.0`, `MQ_filter = 30.0`, `MQ_Rank_Sum_filter = -12.5`, and  
909 `Read_Pos_Rank_Sum_filter = -8.0`. Sites were excluded if the coverage was less than

910 5 or greater than the 99<sup>th</sup> quantile of the genomic coverage distribution for the given  
911 line or if the SNP failed to pass one of the GATK filters.

912

### 913 **PCA**

914 We used Principal Component Analysis (PCA) to assess the partition of  
915 genetic variation within the *yakuba* species complex. PCA transforms a set of  
916 possibly correlated variables into a reduced set of orthogonal variables. Sampled  
917 individuals are then projected in a two dimensional space where the axes are the  
918 new uncorrelated variables, or principal components. We used the R package  
919 *adegenet* [148] to run separate PCA analyses for the X chromosome and autosomes  
920 and plotted the first five principal components. For all PCA, we calculate the amount  
921 of variance explained by each principal component.

922

### 923 **ABBA – BABA tests**

924 To calculate interspecific gene flow, we first calculated historical levels of  
925 gene flow between different species pairs in the *yakuba* clade with the ABBA-  
926 BABA/D statistic [31,33,71,149] using a perl script. The ABBA-BABA test compares  
927 patterns of ancestral (A) and derived (B) alleles between four taxa. In the absence of  
928 gene flow, one expects to find equal numbers of sites for each pattern. However,  
929 gene flow from the third to the second population can lead to an excess of the ABBA  
930 pattern with respect to the BABA pattern, which is what the D statistic tests for. We  
931 used allele frequencies within the specified populations (i.e., putative recipient,  
932 putative donor, outgroup) as the ABBA and BABA counts following [33,71]. We  
933 assessed the significance of ABBA-BABA test statistics using the commonly  
934 employed method of weighted block jackknifing with 100kb windows [150]. Briefly,  
935 this systematically removes consecutive non-overlapping portions of the genome  
936 (100kb blocks in this case) and re-estimates the statistic of interest to generate a  
937 confidence interval around it. We also estimated the proportion of the genome that  
938 was introgressed with the  $f_d$  statistic [71].  $f_d$  compares the observed difference

939 between the ABBA and BABA counts to the expected difference when the entire  
940 genome is introgressed.

941

#### 942 *Treemix*

943 We used *TreeMix* [32] to investigate the relationship between species and to  
944 look for evidence of historic gene flow. *TreeMix* estimates the most likely  
945 evolutionary history in terms of splits and mixtures of a group of populations by  
946 estimating levels of genetic drift. The analysis is done in two steps. First, it estimates  
947 the relationships between sampled populations and estimates the most likely  
948 maximum likelihood phylogeny. Second, it compares the covariance structure  
949 modeled by this dendrogram to the observed genetic covariance between  
950 populations. The user then specifies the number of admixed events. If a pair of  
951 populations is more closely related than expected by the strictly bifurcating tree,  
952 then maximum likelihood comparisons will suggest an admixture event in the  
953 history of those populations. We ran *Treemix* separately for the *X* chromosome and  
954 the autosomes. The program was run with 6 populations. We assigned only one  
955 population for *D. santomea* due to its limited range and one population for *D.*  
956 *teissieri* since we only had 13 lines even though they originated from multiple  
957 geographic locations. *Drosophila yakuba* was partitioned into four populations: an  
958 ‘islands’ population that included lines from Príncipe and Bioko, an ‘africa’  
959 population containing the mainland African lines from the Ivory Coast, Cameroon,  
960 and Kenya, a ‘low\_st’ population for the lowlands of São Tomé, and a ‘hz\_st’  
961 population for lines from the hybrid zone on São Tomé. We ran *Treemix* for each  
962 dataset with  $m=0$  through 5 migration edges and determined the most likely  
963 number of migration events ( $n$ ) by doing a log likelihood test comparing the runs  
964 with  $m = n$  and  $m = n - 1$ . The most likely value of  $m$  was the largest value of  $n$   
965 before the test was no longer significant at a 0.05 level.

966

#### 967 Hidden Markov model

968

#### 969 Selecting markers for the hidden Markov model

970 *Treemix* and the ABBA-BABA D statistic can be used to assess whether  
971 genetic exchange has occurred between species (and populations), but they do not  
972 identify specific introgressed regions of the genome. We identified introgressed  
973 regions in all individuals from all three species using a hidden Markov model. The  
974 hidden Markov model determined the most likely genotype (the hidden state) for  
975 each SNP we used as a genomic marker. When looking for introgression from one  
976 species into another, we would ideally have allopatric and sympatric populations of  
977 the recipient species. Fixed differences between a putative donor species and an  
978 allopatric population of the recipient species are informative markers that can be  
979 used to help identify introgression. However, allopatric populations do not exist for  
980 all of the species pairs in the *yakuba* clade. The ranges of *D. yakuba* and *D. teissieri*  
981 overlap extensively, and no *D. santomea* flies live more than a few miles from the  
982 hybrid zone with *D. yakuba*. We were, therefore, unable to identify markers that  
983 were definitively associated with the recipient or donor species. Instead, we  
984 selected SNPs to be markers where the donor species was monomorphic and the  
985 allele frequency differences between the two species was greater than or equal to  
986 30%. 30% was chosen because the smaller the allele frequency difference between  
987 species, the less informative an individual site is for identifying introgression and  
988 the noisier the data becomes as neutral mutations that are segregating at a low  
989 frequency in the recipient species are also included. Furthermore, we required that  
990 every individual in the donor species and at least one individual in the recipient  
991 species had a called genotype. We also excluded sites where more than 80% of the  
992 individuals with a genotype call from GATK were heterozygous as the high  
993 frequency of heterozygotes likely indicated mapping error. For the *D. santomea* into  
994 *D. yakuba* analysis, we excluded four lines from *the D. santomea* donor population  
995 that were more similar to *D. yakuba* for both PC1 and PC2 for the autosomal PCA  
996 analysis: sanST07, BS14, C550\_39, and san\_Field3. They were excluded since they  
997 were expected to have higher levels of introgression which would reduce the  
998 number of markers because of the requirement that the donor species be  
999 monomorphic.

## 1000 Transition Probabilities

1001 Transition probabilities determine how likely the HMM is to move between  
1002 the hidden states. The transition probabilities use two starting probabilities,  $a$  for  
1003 transitions between non-error states and  $a_e$  for transitions between error states.  
1004 Separate transition probabilities and starting probabilities are calculated for each  
1005 marker and depend on the distance to the next marker. We modeled the starting  
1006 probabilities as Poisson variables with the parameter equal to the per site  
1007 recombination rate,  $c$ , times the distance between the two sites. The parameter for  
1008  $a_e$  also used a multiplier  $m$ . The multiplier ensured that it was somewhat easier to  
1009 stay in an error state. For the *D. santomea* and *D. yakuba* introgression analysis, we  
1010 used  $c = 10^{-9}$  and  $m = 25,000$ . Base transition probabilities for non-error ( $a$ ) and  
1011 error sites ( $a_e$ ) were based on the distance between the two neighboring markers  
1012 (whose positions are denoted as  $x_i$  and  $x_{i-1}$ ):

$$a = c(x_i - x_{i-1})e^{-c(x_i - x_{i-1})}$$

$$a_e = mc(x_i - x_{i-1})e^{-mc(x_i - x_{i-1})}$$

1013 The transition probability matrix was constructed so the model was more  
1014 likely to transition from a non-error state to the same non-error state. Transitioning  
1015 from a non-error state to the corresponding error state was impossible (e.g. from  
1016 homo\_r to homo\_re). The probability of transitioning from an error state to another  
1017 error state was small to ensure the model would quickly leave the error states. The  
1018 transition probability matrix represents the probability of transferring from the  
1019 state denoted by the row to that of the column.

$$\begin{matrix}
 & \begin{matrix} homo\_r & het & homo\_d & homo\_r_e & het_e & homo\_d_e \end{matrix} \\
 \begin{matrix} 1020 \\ 1021 \\ 1022 \\ 1023 \\ 1024 \end{matrix} & \begin{pmatrix}
 1 - 4a & a & a & 0 & a & a \\
 a & 1 - 4a & a & a & 0 & a \\
 a & a & 1 - 4a & a & a & 0 \\
 0 & \frac{1-2a_e}{4} & \frac{1-2a_e}{4} & 2a_e & \frac{1-2a_e}{4} & \frac{1-2a_e}{4} \\
 \frac{1-2a_e}{4} & 0 & \frac{1-2a_e}{4} & \left(\frac{9}{10}\right)\left(\frac{1-2a_e}{2}\right) & a_e & \left(\frac{1}{10}\right)\left(\frac{1-2a_e}{2}\right) \\
 \frac{1-2a_e}{4} & \frac{1-2a_e}{4} & 0 & \left(\frac{9}{10}\right)\left(\frac{1-2a_e}{2}\right) & \left(\frac{1}{10}\right)\left(\frac{1-2a_e}{2}\right) & a_e
 \end{pmatrix} & \begin{matrix} homo\_r \\ het \\ homo\_d \\ homo\_r_e \\ het_e \\ homo\_d_e \end{matrix}
 \end{matrix}$$

## 1021 Emission Probabilities

1022 The HMM only used biallelic sites, and the two alleles are expressed as  $a$  and  
 1023  $b$ . Let  $k$  represent the number of copies of the  $a$  allele at a given site, and the  
 1024 probability of seeing  $k$  copies without sequencing error is:

$$P(X = k) = P(Y = k)$$

1025 Where  $Y$  is a random variable denoting the number of  $a$  alleles present in the DNA  
 1026 fragments for that site chosen for sequencing. These reads are then sampled from to  
 1027 determine which reads are subjected to sequencing error. Define two random  
 1028 variables  $A$  and  $B$  as respectively the number of  $a$  and  $b$  alleles resulting from  
 1029 sequencing error. For a total coverage of  $n$ ,  $P(X = k)$  can be written as:

$$P(X = k) = \sum_{i=0}^n P(Y = i)P(A - B = k - i)$$

$$P(X = k) = \sum_{i=0}^n P(Y = i) \sum_{j=k-i}^{n-i} P(A = j)P(B = j - k + i)$$

1030

1031 Using binomial probabilities for  $Y$ ,  $A$ , and  $B$ , equation (3) can be expanded to:

$$\begin{aligned}
 P(X = k) = & \sum_{i=0}^n \frac{n!}{i!(n-i)!} p^i (1 \\
 & - p)^{n-i} \sum_{j=k-i}^{n-i} \left( \begin{array}{l} 0, \\ \frac{(n-i)!}{j!(n-i-j)!} p_a^j (1 \\ - p_a)^{n-i-j}, \text{ if } j < 0 \\ \text{otherwise} \end{array} \right) \left( \begin{array}{l} 0, \\ i! \\ \frac{i!}{(j-k+i)!(k-j)!} p_{ab}^{j-k+i} (1 \\ - p_b)^{k-j}, \text{ if } j < 0 \\ \text{otherwise} \end{array} \right)
 \end{aligned}$$

1032 where  $p$  is the probability of sampling an  $a$  allele from the sequenced DNA  
 1033 fragments.  $p_a$  is the per base probability of obtaining an  $a$  allele via sequencing, and  
 1034 likewise,  $p_b$  is the sequencing error probability for a  $b$  allele. Simplifying further  
 1035 yields:

$$P(X = k) = \sum_{i=0}^n n! p^i (1-p)^{n-i} \sum_{j=\max(0, k-i)}^{\min(k, n-i)} \frac{p_a^j p_b^{j-k+i} (1-p_a)^{n-i-j} (1-p_b)^{k-j}}{j!(n-i-j)!(j-k+i)!(k-j)!}$$

1036 Assuming all alleles are equally likely through sequencing error, we define  $p_{ab}$   
 1037 =  $p_a = p_b$ , and equation (5) simplifies further to yield the per base emission  
 1038 probability:

$$P(X = k) = \sum_{i=0}^n n! p^i (1-p)^{n-i} \sum_{j=\max(0, k-i)}^{\min(k, n-i)} \frac{p_{ab}^{2j-k+i} (1-p_{ab})^{n+k-i-2j}}{j!(n-i-j)!(j-k+i)!(k-j)!}$$

1040

1041

## 1042 Identifying introgression tracts

1043 The HMM determined the most probable genotype for each marker in each  
 1044 individual. We defined tracts as contiguous markers with the same genotype, and a  
 1045 series of seven filters were then applied to the tracks in the order listed below. In  
 1046 the descriptions that follow, “het” refers to a heterozygous tract, “homo\_d” to a tract  
 1047 that is homozygous for donor species alleles, “homo\_r” to a track that is homozygous



1048 for recipient species alleles, and an introgression tract can be either a het or homo\_d  
1049 tract. Introgression SNPs are defined as those within the tract where the HMM  
1050 probability for an introgression state (het or homo\_d) was  $\geq 50\%$ . In subsequent  
1051 analyses we treated homozygous and heterozygous introgression tracts equally  
1052 because the sequenced lines were isofemale and because the filtering rules  
1053 combined adjacent homozygous and heterozygous tracts. We applied the following  
1054 filters:

- 1055 1) Merge het and homo\_d tracts – Adjacent het and homo\_d tracts represented a  
1056 single introgression that the HMM assigned to multiple genotypes. In such  
1057 cases, all adjacent het and homo\_d tracts were combined into a single tract  
1058 with the genotype determined by the genotype that had the most  
1059 introgression SNPs. Ties were assigned to het.
- 1060 2) Remove small het and homo\_d tracts in high error regions – Some genomic  
1061 regions were characterized by multiple rapid transitions between states.  
1062 These regions could result from mapping error, incorrectly assembled  
1063 genomic regions, and or ancient introgressions that had been greatly reduced  
1064 by recombination. Most of the tracts in such regions were small and ended up  
1065 in error states. When a het or homo\_d tract was found in the middle of one of  
1066 these regions, we deemed it best to treat it as an error state. het and homo\_d  
1067 tracts were assigned to their corresponding error state if they had less than  
1068 15 introgression snps and the number of their introgression snps divided by  
1069 the sum of SNPs from all adjacent contiguous blocks of error tracts was less  
1070 than 3.
- 1071 3) Remove error blocks – homo\_r tracks were sometimes broken up by either a  
1072 single error tract or short blocks of error tracts. Such cases likely resulted  
1073 from mapping error, incorrectly assembled regions of the genome, or new  
1074 mutations in the recipient species. In such cases, the contiguous blocks of  
1075 error tracts bounded on both sides by homo\_r tracts were reassigned to  
1076 homo\_r.
- 1077 4) Merge small error tracts – Similarly to filter 3, introgression tracks could also  
1078 be broken up by error tracts. Contiguous blocks of error tracts bounded on

1079 both sides by introgression tracts were all combined and assigned whichever  
1080 of the het or homo\_d tracts had the most introgression SNPs. Ties were  
1081 assigned to het.

1082 5) Convert error tracts to homo\_r – After the first four filters were applied, any  
1083 remaining error tracts were changed to homo\_r.

1084 6) Remove small homo\_r tracts – After the error tracts were removed, some of  
1085 the larger introgression tracts were broken up by small homo\_r tracts. Such  
1086 cases could result from mapping error, incorrectly assembled genomic  
1087 regions, or newly arisen mutants in the recipient species. Since most of the  
1088 intervening homo\_r tracts were small and on the order of a single SNP or less  
1089 than 100bp, they were unlikely to represent multiple crossover events. We,  
1090 therefore, combined the introgression and homo\_r tracts. homo\_r tracts with  
1091 less than 5 total SNPs bounded on both sides by introgression tracts with at  
1092 least 10 total SNPs each were all combined into a single tract. The genotype  
1093 was determined by whichever of the het or homo\_d tracts had the most total  
1094 SNPs. Ties were assigned to het.

1095 7) Merge het and homo\_d tracts – The first filter was run a second time.

1096

1097 Figure S15A contains a graphical representative of the process of a  
1098 representative region for a *san*-into-*yak* introgression for the line  
1099 SãoTomé\_city\_14\_26. The panels show the markers, the allele coverages at those  
1100 markers, the genotype probabilities returned by the HMM, and the unfiltered and  
1101 filtered tracts. Figure S15B shows the tracts for the same region for all 56 *D. yakuba*  
1102 lines. Software and documentation for Int-HMM are available at  
1103 <https://github.com/dturissini/Int-HMM>.

1104

### 1105 **Simulating introgressions**

1106 We ran the HMM on simulated introgressions to test its accuracy. The  
1107 introgressions were simulated with a perl script that processed the vcf file  
1108 containing the genotyping results for the all three species. Introgressions were  
1109 simulated with sizes ranging from 100b to 100kb with random distances between

1110 them uniformly distributed between 25kb and 75kb. Each introgressed region had a  
1111 50% chance of being either heterozygous or homozygous. Alleles at each site were  
1112 determined by sampling from the alleles present in the donor species within  
1113 introgressed regions and from the recipient species elsewhere with probabilities  
1114 determined by population level allele frequencies. Per site coverages from  
1115 sequencing data vary, and we modeled this by randomly sampling the coverage at  
1116 each site from a uniform distribution with values ranging from 10 to 25. At  
1117 heterozygous sites, the relative allele coverages were determined by binomial  
1118 sampling. We then created markers for individuals and ran the HMM analysis for a  
1119 single individual for three introgression scenarios: *D. yakuba* into *D. santomea*, *D.*  
1120 *santomea* into *D. yakuba*, *D. yakuba* into *D. teissieri*, and *D. teissieri* into *D. yakuba*.

1121

## 1122 **Comparing introgressions between the X chromosome and autosomes**

1123 *Drosophila* males are heterogametic, and the X chromosome is commonly  
1124 involved in hybrid breakdown [69,93,151]. Introgressions may be more easily  
1125 purged by selection when Xlinked rather than autosomal. We determined if  
1126 introgressions on the X chromosome were underrepresented with respect to the  
1127 autosomes by comparing their cumulative introgression lengths using  
1128 randomization tests. In a purely neutral scenario, introgressions will be uniformly  
1129 distributed across chromosomes. Since the X-chromosome encompasses 18% of the  
1130 *Drosophila* assembled genome, any significant downward deviations from this  
1131 number might indicate selection against introgression in the X-chromosome. For  
1132 each of the four introgression directions (two reciprocal directions in two species  
1133 pairs), we compared the observed proportion of introgressed sequence on the X to a  
1134 distribution of proportions obtained by reshuffling the introgressed tracts randomly  
1135 through the genome from all individuals 10,000 times without replacement. Each  
1136 iteration of the resampling calculated the percentage of introgressed material that  
1137 was on the X-chromosome (given this random-neutral assortment) given that each  
1138 fragment had a 18.41% chance of being assigned to X chromosome. P values for the  
1139 hypothesis that introgression tracts were underrepresented on X-chromosomes

1140 were obtained by dividing the number of resampled proportions that were lower  
1141 than the observed value by 10,000.

1142

### 1143 **Expected patterns from ancestral variation**

1144 Distinguishing introgression from ancestral polymorphism is crucial to  
1145 understand the causes of shared genetic variation. We assessed whether our  
1146 purported introgressions could instead be the result of ancestral variation that was  
1147 still segregating in the recipient species using two approaches. First, we calculated  
1148 the expected time for an allele segregating in the ancestral population to be either  
1149 fixed [152]:

1150

$$T_{fixed} = \frac{-4N_e(1-p)\ln(1-p)}{p}$$

1151 or lost [152]:

1152

$$T_{lost} = \frac{-4N_e p \ln(p)}{1-p}$$

1153

1154 Where  $p$  is the initial allele frequency, and  $N_e$  is the ancestral effective population  
1155 size. We used three values of  $N_e$ :  $10^4$ ,  $10^5$ , and  $10^6$ .

1156 We also looked into the expected lengths of ancestral haplotype blocks still  
1157 segregating in the recipient species. We generated a distribution of expected  
1158 fragment lengths by sampling from the expected distribution of one-sided distances  
1159 to a recombination event using the simplified probability density function for  
1160 equation (3) from [153]. We sampled from the distribution twice and added the two  
1161 lengths to obtain the expected fragment length. We assumed a 50Mb chromosome, a  
1162 divergence time of one million years, and effective population sizes ( $N_e$ ) of  $10^4$  and  
1163  $10^6$ . We also used generation times of 14, 21, and 28 days to cover a range of lengths  
1164 around the estimated generation length of 24 days for *Drosophila melanogaster*  
1165 [36]. This procedure was repeated one million times to generate a distribution of  
1166 expected fragment lengths. Genetic map lengths were converted to base pairs by

1167 dividing by a per base recombination rate of  $r = 1.2 \times 10^{-8}$  for *D. melanogaster*  
1168 [154].

1169

### 1170 **SELAM simulations**

1171 We obtained rough estimates of the age of introgression by comparing the  
1172 length of our observed introgressions to those generated by simulations from the  
1173 program SELAM [74]. SELAM is a forward time simulation program capable of  
1174 modeling admixture at a genomic scale with recombination. We ran SELAM  
1175 assuming census population sizes of 10,000 for both species. All sites were assumed  
1176 to be neutral, and the simulations had three chromosomes with lengths of 1, 1, and  
1177 0.75 morgans to represent the *D. yakuba* chromosomes 2, 3, and *X* respectively. In  
1178 the absence of a recombination map for *D. yakuba*, recombination rates were  
1179 assumed to be uniform across each chromosome. We modeled a single generation  
1180 pulse of introgression and recorded the introgression tracks from 50 sampled  
1181 individuals every 100 generations for 10,000 generations. We ran the program five  
1182 times each for four initial migration rates of 0.1, 0.01, 0.001, and 0.0001.

1183

### 1184 **Linkage Disequilibrium**

1185 We calculated  $r^2$  as a metric of linkage disequilibrium (LD). This  
1186 measurement had two goals. First, we calculated the amount of LD to verify if we  
1187 could use published methods to detect introgression that explicitly relies on this  
1188 measurement (e.g., [26]). A fast decay of LD, precludes the possibility of using these  
1189 methods because even when LD based methods can detect admixture LD, these  
1190 methods often rely on calculating background LD as well. Second, we used it to  
1191 confirm that the introgressed tracts we identified were not ancestral haplotypes  
1192 that were still present in both the donor and recipient species. Low levels of LD  
1193 argue against this possibility. LD was measured for each of the three species using  
1194 PLINK [73]. LD was measured separately for the *X* chromosome and the autosomes.  
1195 We only used SNPs where the per site coverage was between 5 $\times$  and the 99<sup>th</sup>  
1196 quantile of the genomic distribution of coverages for a given individual. Also, at least

1197 half of the individuals needed to have had a called genotype in the VCF file produced  
1198 by GATK. PLINK was run with the following parameters: plink --noweb - --r2 --maf  
1199 .05 --ld-window 999999 --ld-window-kb 25 --ld-window-r2 0.

1200

### 1201 **Measuring proportions of F1 hybrids in the field**

1202

1203 The proportion of males collected in the field that are F1 hybrids is a proxy  
1204 for the current rate of hybridization. For *D. yakuba* and *D. santomea*, we used  
1205 estimates of F1 hybridization from [44,45,49]. We also added estimates of F1  
1206 hybridization from a new field collection in 2016. We used estimates for F1  
1207 hybridization between *D. yakuba* and *D. teissieri* from 2009 and 2013 as reported in  
1208 [54].

1209

### 1210 **Data availability**

1211

1212 Fastq files are available at SRA (Accession number: TBD). All analytical code  
1213 has been deposited at Dryad (Accession number: TBD). Code for Int-HMM is  
1214 available at <https://github.com/dturissini/Int-HMM>.

1215

### 1216 **Ethics statement**

1217

1218 *Drosophila* flies were collected in São Tomé é Príncipe with the permission of  
1219 the Direccão Geral do Ambiente do São Tomé é Príncipe. Permits to collect in Bioko  
1220 were issued by the Universidad Nacional de Guinea Ecuatorial (UNGE). Live flies  
1221 imported to USA as stated in the USDA permit: P526P-15-02964.

1222

### 1223 **ACKNOWLEDGEMENTS**

1224 We would like to thank members of the Jones, Burch, Vision, and Matute labs  
1225 for helpful feedback and UNC for startup funding. A. Comeault, B. Cooper, C.D. Jones,  
1226 K.L. Gordon, R. Marquez, C. Martin and M. Turelli gave us useful comments. We do  
1227 not have any conflicts of interest.

1228 **TABLES**

1229

1230 **TABLE 1.** D-statistic variations (D [31,32] and  $f_d$  [71]) show evidence for admixture  
1231 between *D. yakuba* (mainland, São Tomé hybrid zone—HZ—, and other  
1232 islands—Bioko and Principe—) and *D. santomea* and between *D. yakuba* and *D.*  
1233 *teissieri*. Note, that the negative numbers of D indicate that the average direction of  
1234 the introgression goes from the population assigned as putatively recipient to the  
1235 population assigned as putatively donor.

| Allopatric population           | Recipient population           | Donor population   | outgroup               | D         | Z-score  | $f_d$     |
|---------------------------------|--------------------------------|--------------------|------------------------|-----------|----------|-----------|
| <i>D. yakuba</i> mainland       | <i>D. yakuba</i> HZ            | <i>D. santomea</i> | <i>D. teissieri</i>    | 0.015173  | 189.739  | 0.001862  |
| <i>D. yakuba</i> mainland       | <i>D. yakuba</i> other islands | <i>D. santomea</i> | <i>D. teissieri</i>    | 0.030080  | 311.41   | 0.003607  |
| <i>D. yakuba</i> mainland       | <i>D. yakuba</i> HZ            | <i>D. santomea</i> | <i>D. melanogaster</i> | -0.019728 | -292.231 | -0.003141 |
| <i>D. yakuba</i> mainland       | <i>D. yakuba</i> other islands | <i>D. santomea</i> | <i>D. melanogaster</i> | -0.023744 | -286.188 | -0.003742 |
| <i>D. teissieri</i> (not Bioko) | <i>D. teissieri</i> (Bioko)    | <i>D. yakuba</i>   | <i>D. melanogaster</i> | -0.030094 | -754.157 | -0.002709 |

1236

1237

1238

1239 SUPPLEMENTARY FIGURES

1240

1241 **Figure S1. Principle Component Analysis (PCA) for the *D. yakuba* clade.** Principle  
1242 component results for PC1 and PC2 for the *D. yakuba* clade. **A)** Autosomes. **B)** X  
1243 chromosome.

1244

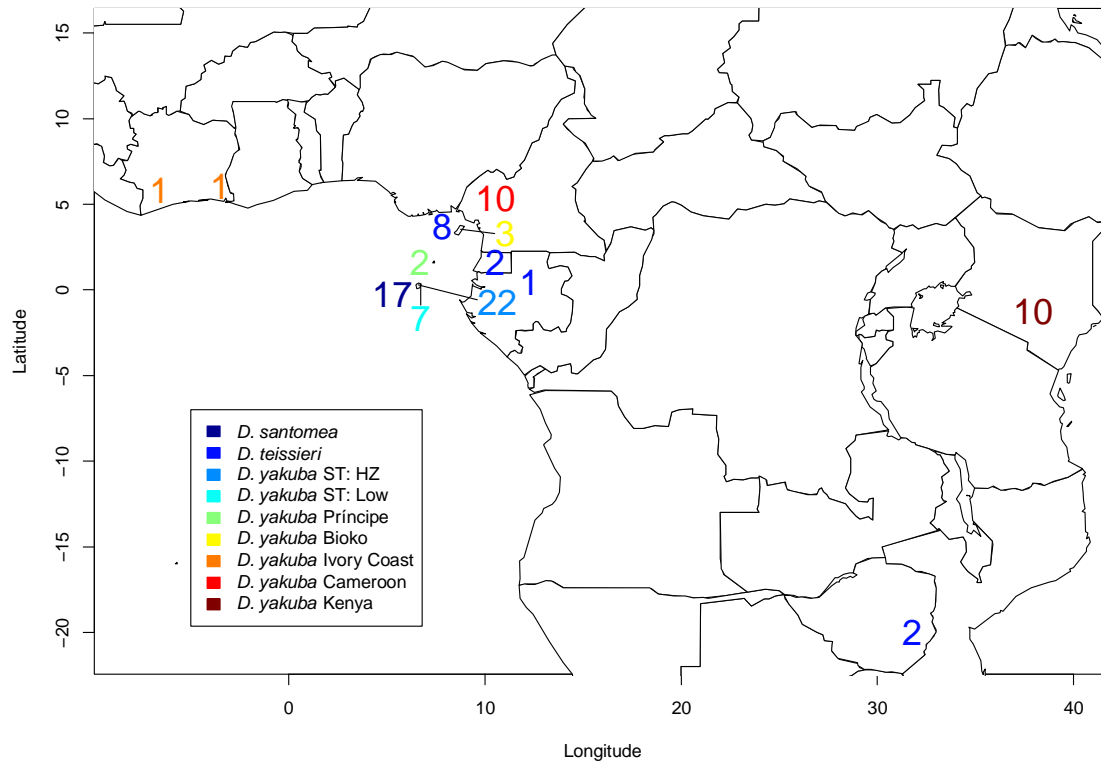

1245

1246



1247 **Figure S2. *Treemix* results for the X chromosome.** X chromosome *Treemix* trees with  
1248 0 to 3 migration edges (the most likely value of  $m=4$ , Figure 1A). *Drosophila yakuba*  
1249 was split into four populations: “africa” (Cameroon, Kenya, Ivory Coast), “islands”  
1250 (Príncipe and Bioko), “low\_st” (lowlands of São Tomé), and “hz\_st” (hybrid zone on  
1251 São Tomé). The P value was calculated for a tree with  $m$  migration edges by taking a  
1252 log-likelihood ratio test using the likelihoods for the threes with  $m$  and  $m-1$   
1253 migration edges. **A)  $m=0$ . B)  $m=1$ . C)  $m=2$ . D)  $m=3$ .**  
1254

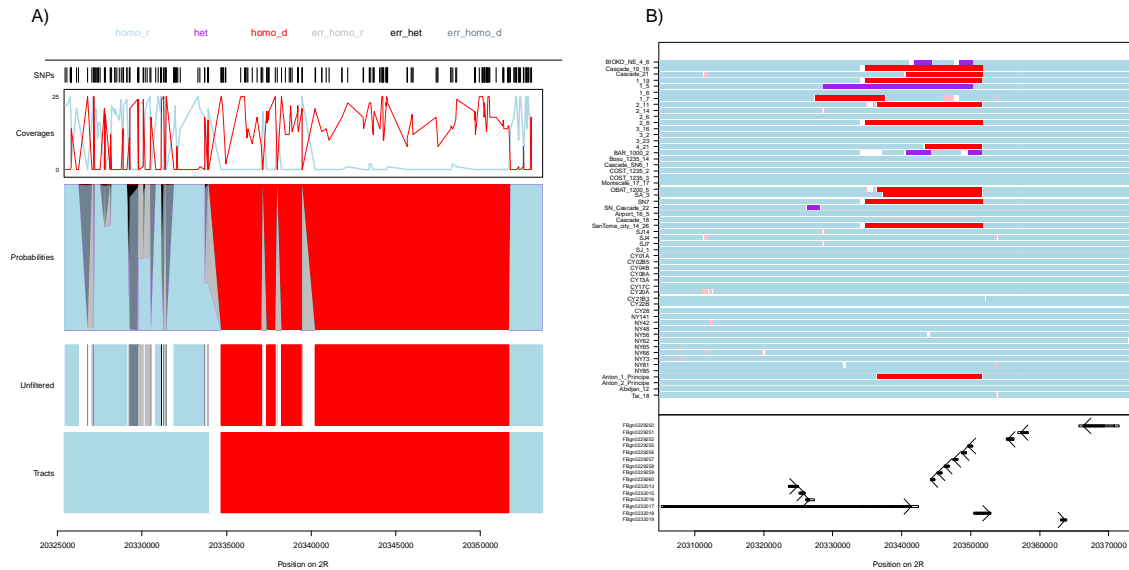

1255  
1256

1257 **Figure S3. Treemix results for autosomes.** Autosomal Treemix trees with 0 to 3  
1258 migration edges (the most likely value of  $m=4$ , Figure 1B). *Drosophila yakuba* was  
1259 split into four populations: “africa” (Cameroon, Kenya, Ivory Coast), “islands”  
1260 (Príncipe and Bioko), “low\_st” (lowlands of São Tomé), and “hz\_st” (hybrid zone on  
1261 São Tomé). The P value was calculated for a tree with  $m$  migration edges by taking a  
1262 log-likelihood ratio test using the likelihoods for the threes with  $m$  and  $m-1$   
1263 migration edges. **A)  $m=0$ . B)  $m=1$ . C)  $m=2$ . D)  $m=3$ .**  
1264

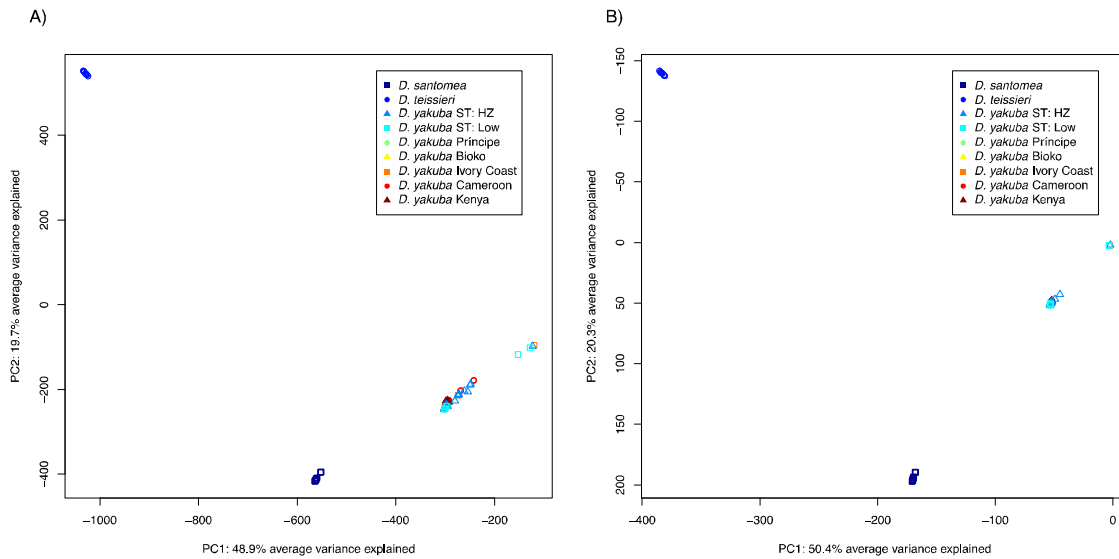

1265  
1266

1267 **Figure S4. Linkage disequilibrium decays on the order of a few hundred base pairs in**  
1268 **all three species in the *D. yakuba* clade. Average LD as measured by  $r^2$  between pairs**  
1269 **of SNPs with distances binned every 100bp.  $r^2$  was averaged separately for the**  
1270 **autosomes (red) and X chromosome (blue). A) *D. yakuba*. B) *D. santomea*. C) *D.*  
1271 ***teissieri*.**  
1272**

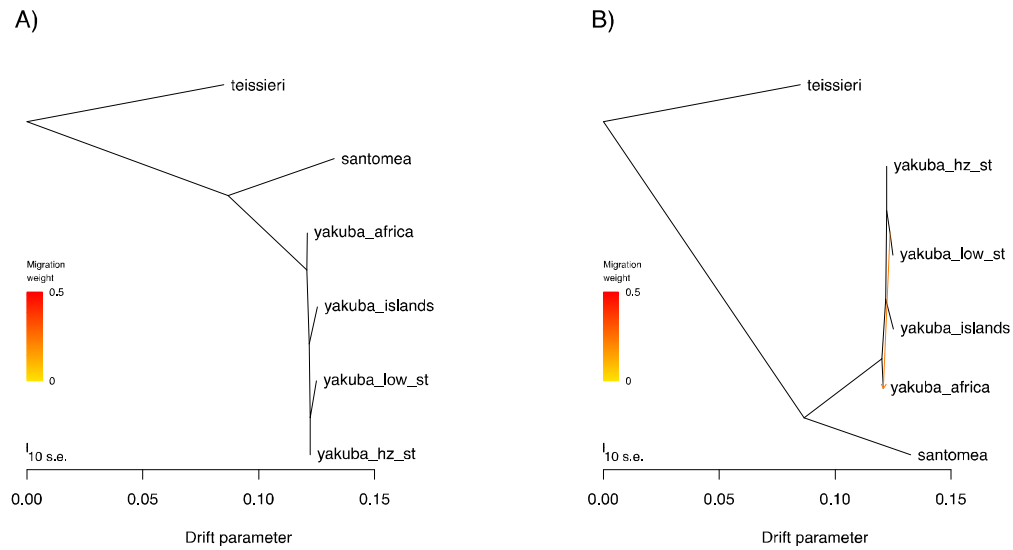

1273  
1274

1275 **Figure S5. Large introgression in the line Anton\_2\_Principe.** 959kb introgression from  
1276 *D. santomea* into the *D. yakuba* line Anton\_2\_Principe collected from the island of  
1277 Príncipe that is significantly larger than the second biggest introgression (120kb).  
1278 Red denotes homozygous *D. santomea* tracts, light blue tracts are homozygous *D.*  
1279 *yakuba*, and purple tracts are heterozygous (inferred using Int-HMM). The lower  
1280 panel shows genes in the genomic region on 3R with the arrows denoting the  
1281 direction of transcription.  
1282

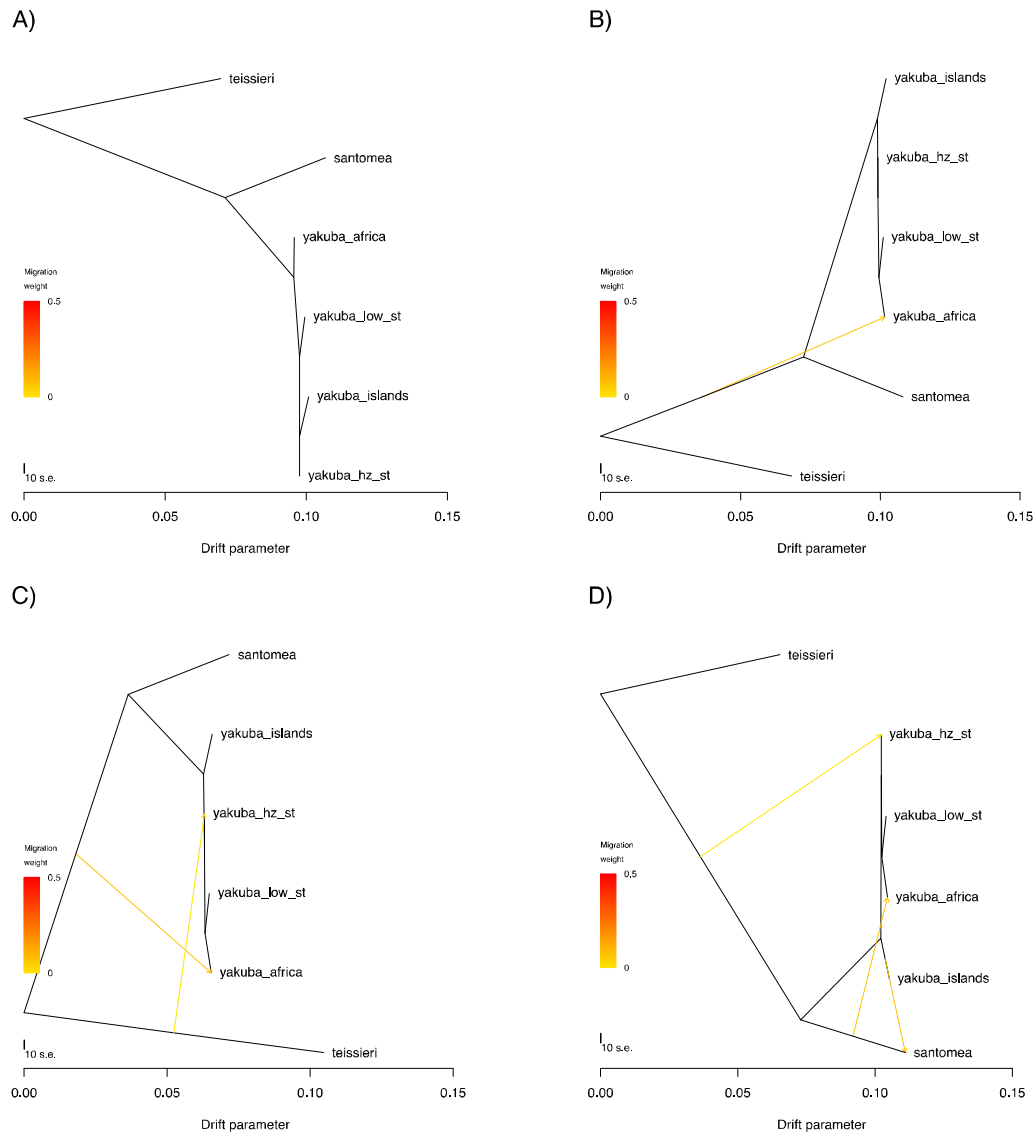

1283  
1284

1285 **Figure S6. Less introgression on the X chromosome than on the autosomes for all**  
1286 **directions of gene flow. Percentage of introgressed sequence on the X chromosome**  
1287 **for 10,000 iterations of resampling without replacement in a neutral scenario where**  
1288 **introgressions are uniformly distributed across the genome. P values were obtained**  
1289 **by dividing the number of resampled proportions that were lower than the**  
1290 **observed value by 10,000. The red line indicates the observed percentage of**  
1291 **introgressed sequence on the X chromosome, and the blue line is the average**  
1292 **percentage from the 10,000 resampling iterations. A) *san*-into-*yak*. B) *yak*-into-*san*.**  
1293 **C) *tei*-into-*yak*. D) *yak*-into-*tei*.**  
1294

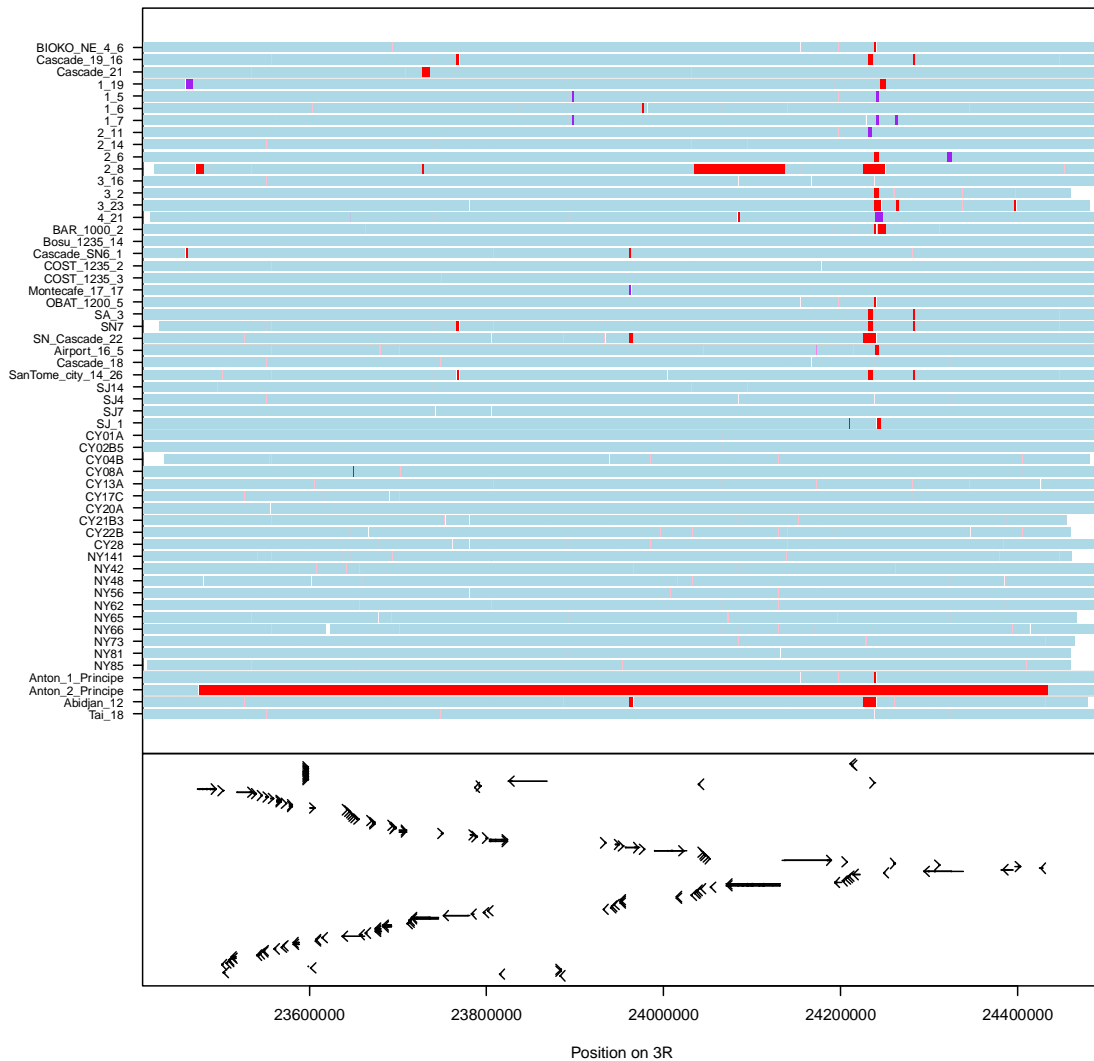

1295  
1296

1297 **Figure S7. Percentage of the genome containing introgressed tracts following a single**  
1298 **generation of introgression.** Results for five independent SELAM runs with a  
1299 population size of 10,000 following a single generation of admixture. The horizontal  
1300 red line represents the observed value for introgression between *D. yakuba* and *D.*  
1301 *santomea* (0.35%), and the horizontal blue line denotes the observed value for  
1302 introgression between *D. yakuba* and *D. teissieri* (0.01%). **A)  $m=0.0001$ . B)**  
1303  **$m=0.001$ . C)  $m=0.01$ . D)  $m=0.1$ .**  
1304

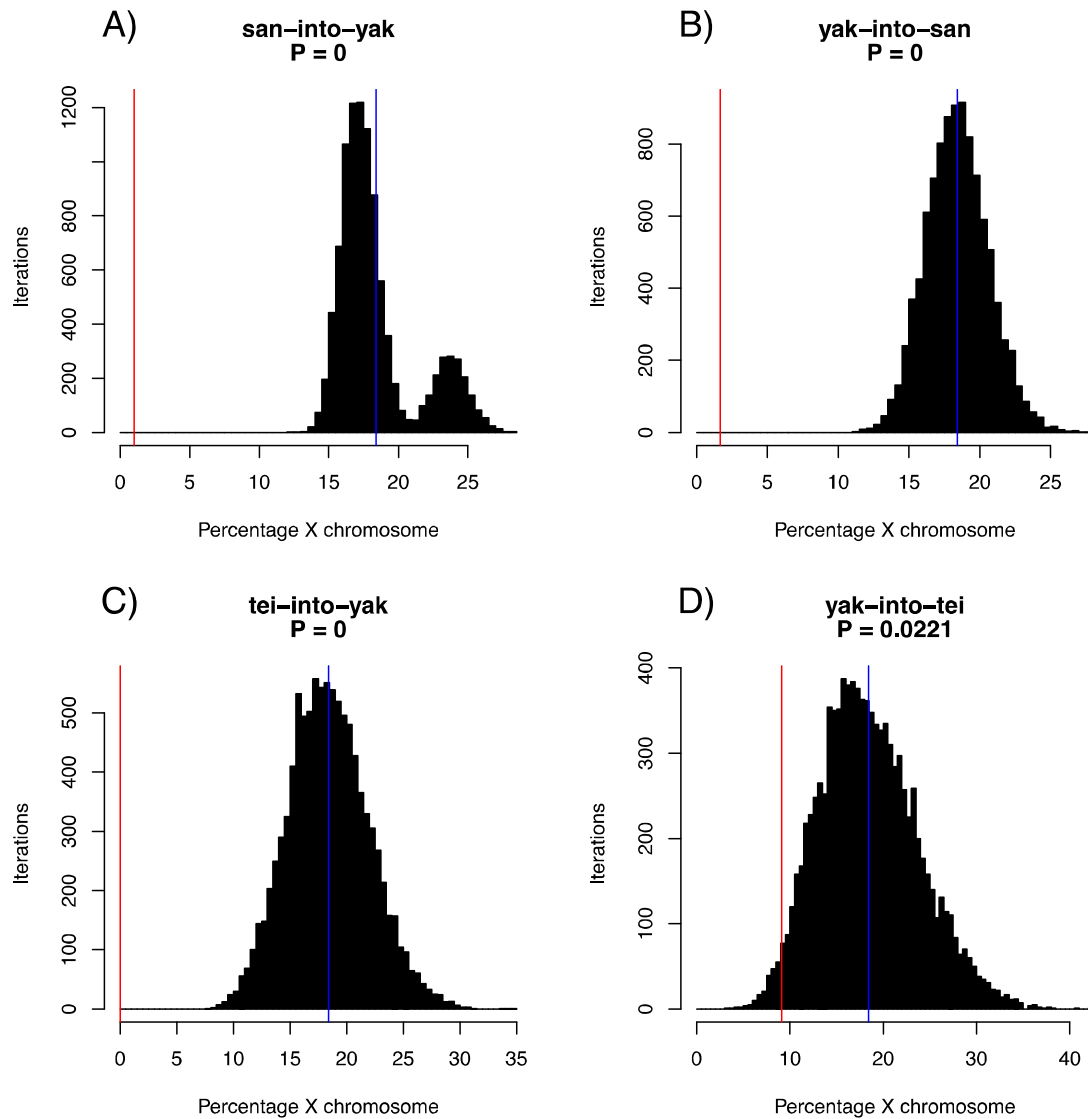

1305  
1306

1307 **Figure S8. Expected average length of introgression tracts following a single**  
1308 **generation of introgression.** Results for five independent SELAM runs with a  
1309 population size of 10,000 following a single generation of admixture. The horizontal  
1310 red line represents the observed value for introgression between *D. yakuba* and *D.*  
1311 *santomea* (6.8kb), and the horizontal blue line denotes the observed value for  
1312 introgression between *D. yakuba* and *D. teissieri* (2.4kb). **A)**  $m=0.0001$ . **B)**  
1313  $m=0.001$ . **C)**  $m=0.01$ . **D)**  $m=0.1$ .  
1314

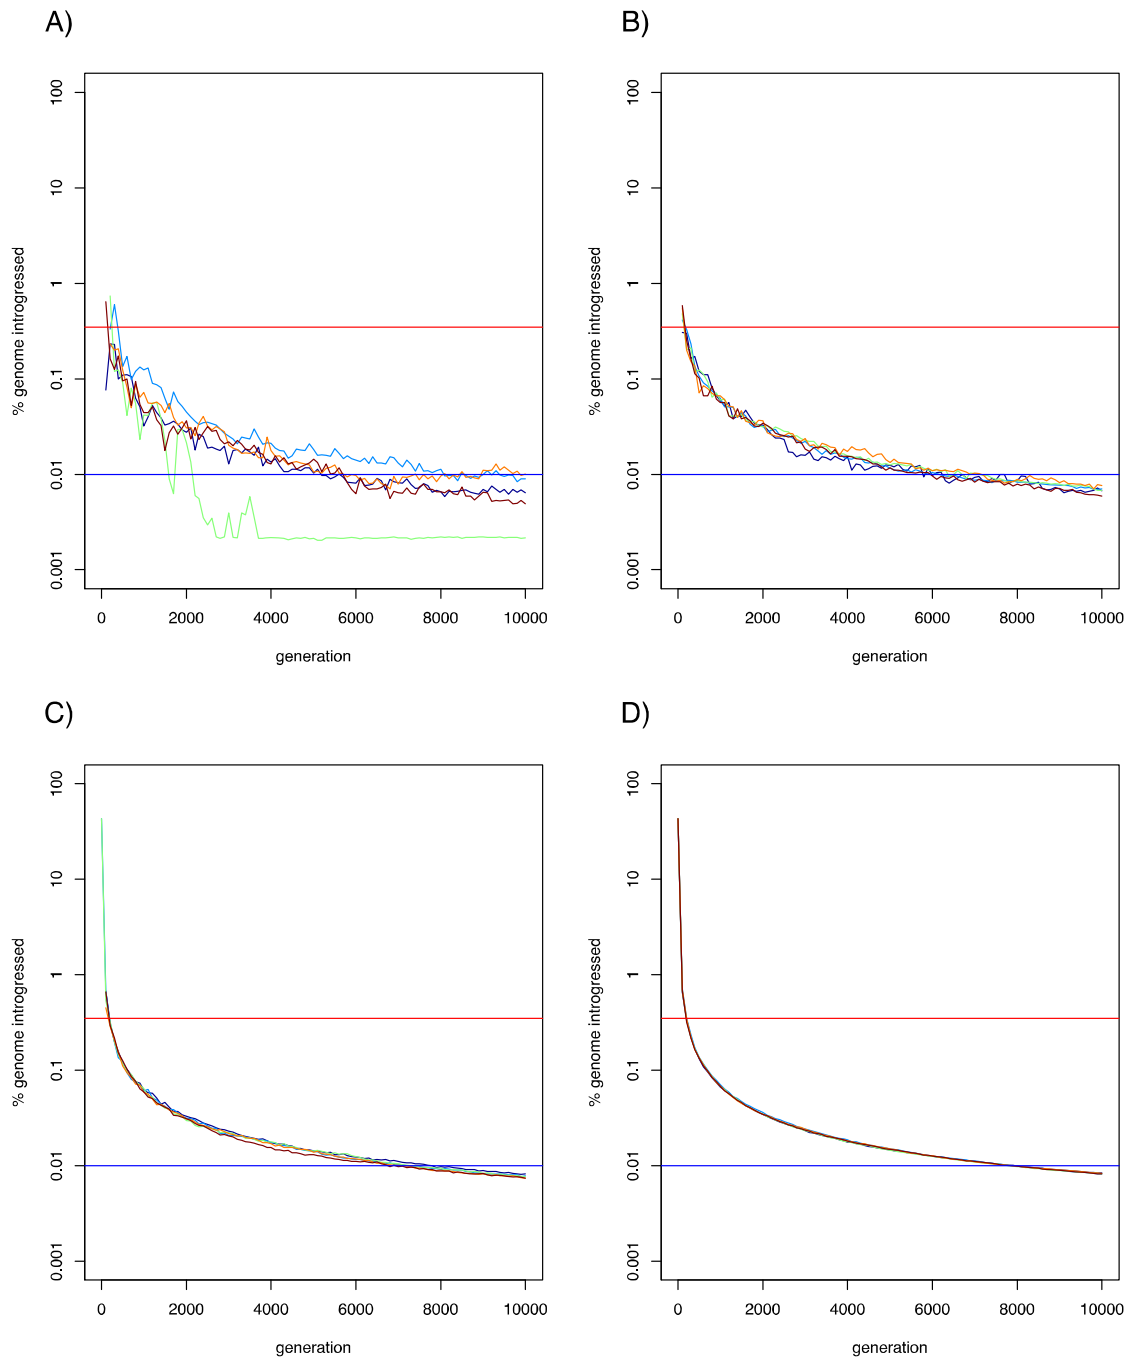

1315

1316 **Figure S9. Identified introgressions between *D. yakuba* and *D. santomea* are unlikely**  
1317 **to represent ancestral variation that is still segregating in the recipient species. Panels**  
1318 **A) through F) show the expected lengths of ancestral haplotype fragments that**  
1319 **would still be segregating in the recipient species. The red line and text indicate the**  
1320 **99<sup>th</sup> quantile of the distribution of fragment sizes. Distributions were calculated**  
1321 **assuming different values for the effective population size and generation length.**  
1322 **Panels G) and H) show the expected number of generations that an allele at a given**  
1323 **frequency  $p$  would take to either be fixed (black line) or lost (red line) from the**  
1324 **population. Horizontal lines denote the number of populations since the two species**  
1325 **diverged assuming generation lengths of 14 days (green line), 21 days (blue line),**  
1326 **and 28 days (purple line). **A)**  $N_e = 10^4$  and generation length = 14 days. **B)**  $N_e = 10^4$**   
1327 **and generation length = 21 days. **C)**  $N_e = 10^4$  and generation length = 28 days. **D)**  $N_e =$   
1328  **$10^6$  and generation length = 14 days. **E)**  $N_e = 10^6$  and generation length = 21**  
1329 **days. **F)**  $N_e = 10^6$  and generation length = 28 days. **G)**  $N_e = 10^4$ . **H)**  $N_e = 10^6$ .**  
1330**

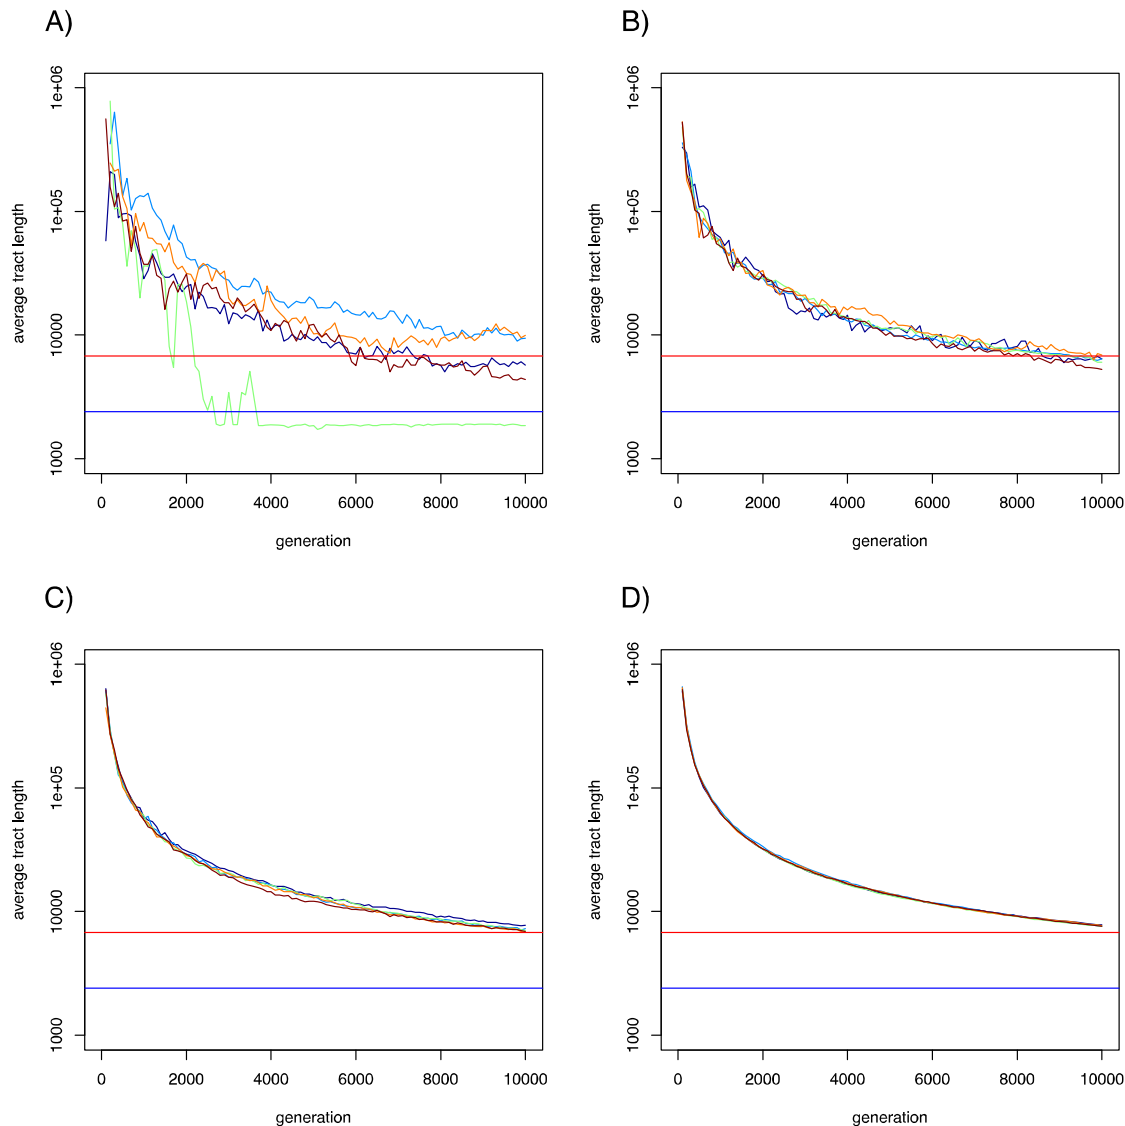



1332 **Figure S10. Identified introgressions between *D. yakuba* and *D. teissieri* are unlikely**  
1333 **to represent ancestral variation that is still segregating in the recipient species. Panels**  
1334 **A) through F) show the expected lengths of ancestral haplotype fragments that**  
1335 **would still be segregating in the recipient species. The red line and text indicate the**  
1336 **99<sup>th</sup> quantile of the distribution of fragment sizes. Distributions were calculated**  
1337 **assuming different values for the effective population size and generation length.**  
1338 **Panels G) and H) show the expected number of generations that an allele at a given**  
1339 **frequency  $p$  would take to either be fixed (black line) or lost (red line) from the**  
1340 **population. Horizontal lines denote the number of populations since the two species**  
1341 **diverged assuming generation lengths of 14 days (green line), 21 days (blue line),**  
1342 **and 28 days (purple line). **A)**  $N_e = 10^4$  and generation length = 14 days. **B)**  $N_e = 10^4$**   
1343 **and generation length = 21 days. **C)**  $N_e = 10^4$  and generation length = 28 days. **D)**  $N_e = 10^6$**   
1344 **and generation length = 14 days. **E)**  $N_e = 10^6$  and generation length = 21**  
1345 **days. **F)**  $N_e = 10^6$  and generation length = 28 days. **G)**  $N_e = 10^4$ . **H)**  $N_e = 10^6$ .**  
1346

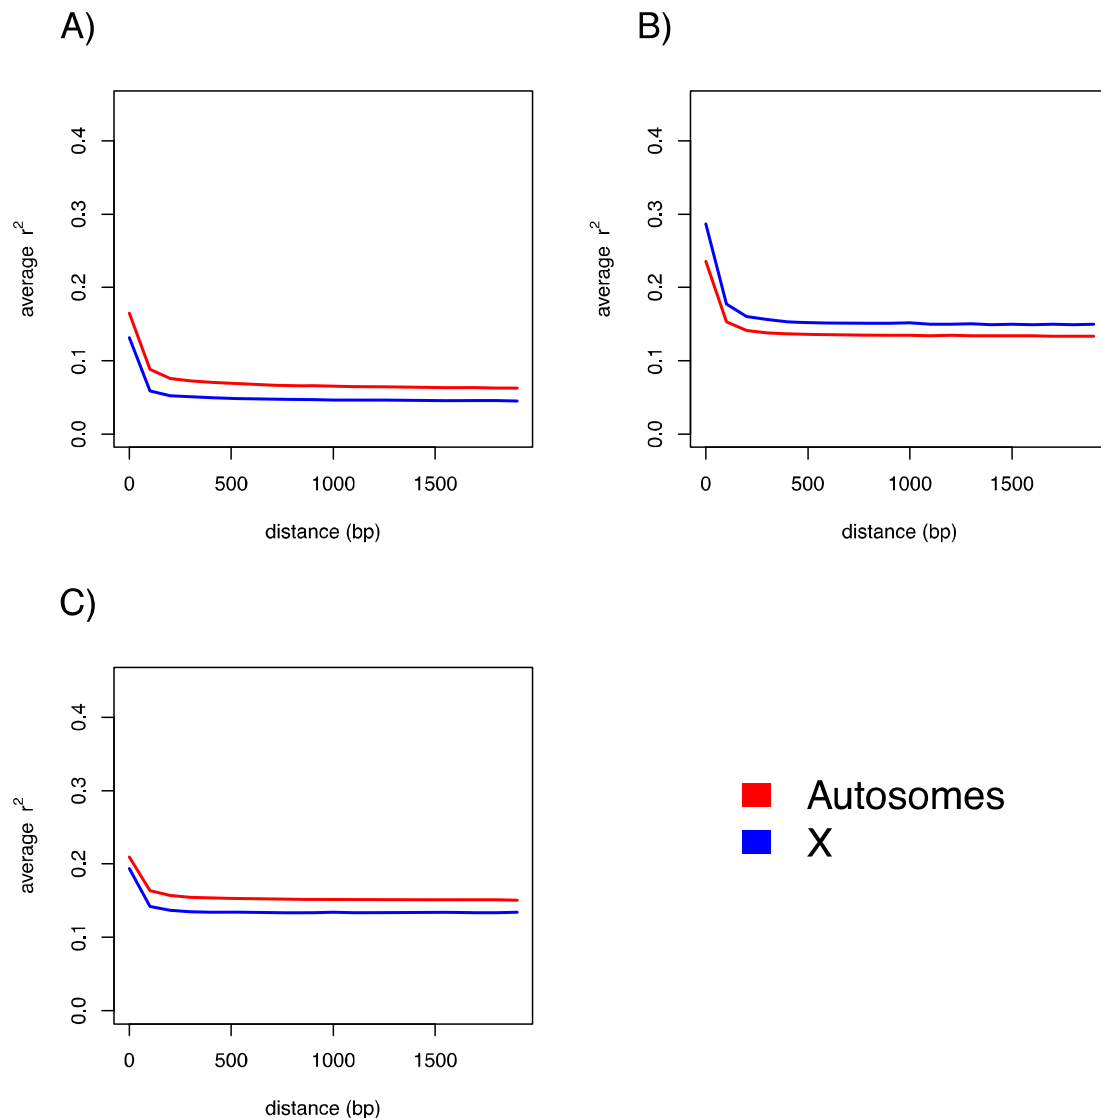

1347

1348 **Figure S11. Region on chromosome 2R (2R: 19,918,908-19,927,758) with the *san-***  
1349 ***into-yak* introgressed frequency  $\geq 50\%$  in the hybrid zone on São Tomé. Tracts for all**  
1350 **56 *D. yakuba* lines. Red bars indicate homozygous *D. santomea* tracts, purple bars**  
1351 **are heterozygous tracts, light bars are homozygous *D. yakuba* tracts, and light pink**  
1352 **tracts indicate homozygous donor tracts that were not considered as introgression**  
1353 **tracts because they were either less than 500bp, had less than SNPs with the donor**  
1354 **allele, or contained more than 30% repetitive sequence. The region of interest is**  
1355 **highlighted by a grey rectangle, and lines from the hybrid zone have blue names.**  
1356 **The bottom of the plot contains rectangles indicating annotated genes with an**  
1357 **arrow indicating the direction of transcription and solid black rectangles denoting**  
1358 **coding sequence.**  
1359

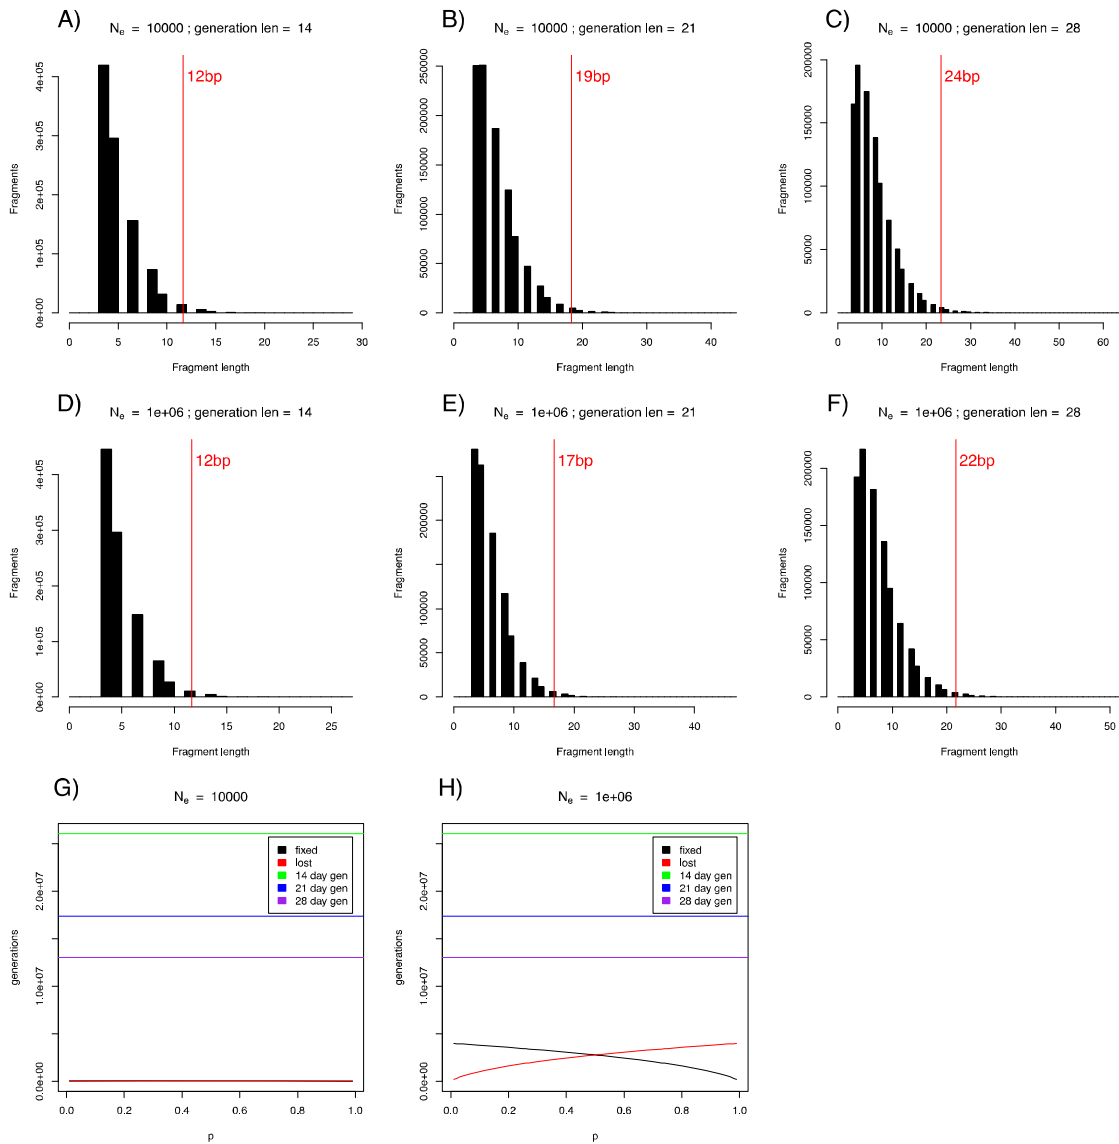

1360  
1361

1362 **Figure S12. Region on chromosome 3L (3L: 6,225,896-6,257,088) with the *san*-into-**  
 1363 ***yak* introgressed frequency  $\geq 50\%$  in the hybrid zone on São Tomé. Tracts for all 56**  
 1364 ***D. yakuba* lines. Red bars indicate homozygous *D. santomea* tracts, purple bars are**  
 1365 **heterozygous tracts, light bars are homozygous *D. yakuba* tracts, and light pink**  
 1366 **tracts indicate homozygous donor tracts that were not considered as introgression**  
 1367 **tracts because they were either less than 500bp, had less than SNPs with the donor**  
 1368 **allele, or contained more than 30% repetitive sequence. The region of interest is**  
 1369 **highlighted by a grey rectangle, and lines from the hybrid zone have blue names.**  
 1370 **The bottom of the plot contains rectangles indicating annotated genes with an**  
 1371 **arrow indicating the direction of transcription and solid black rectangles denoting**  
 1372 **coding sequence.**  
 1373

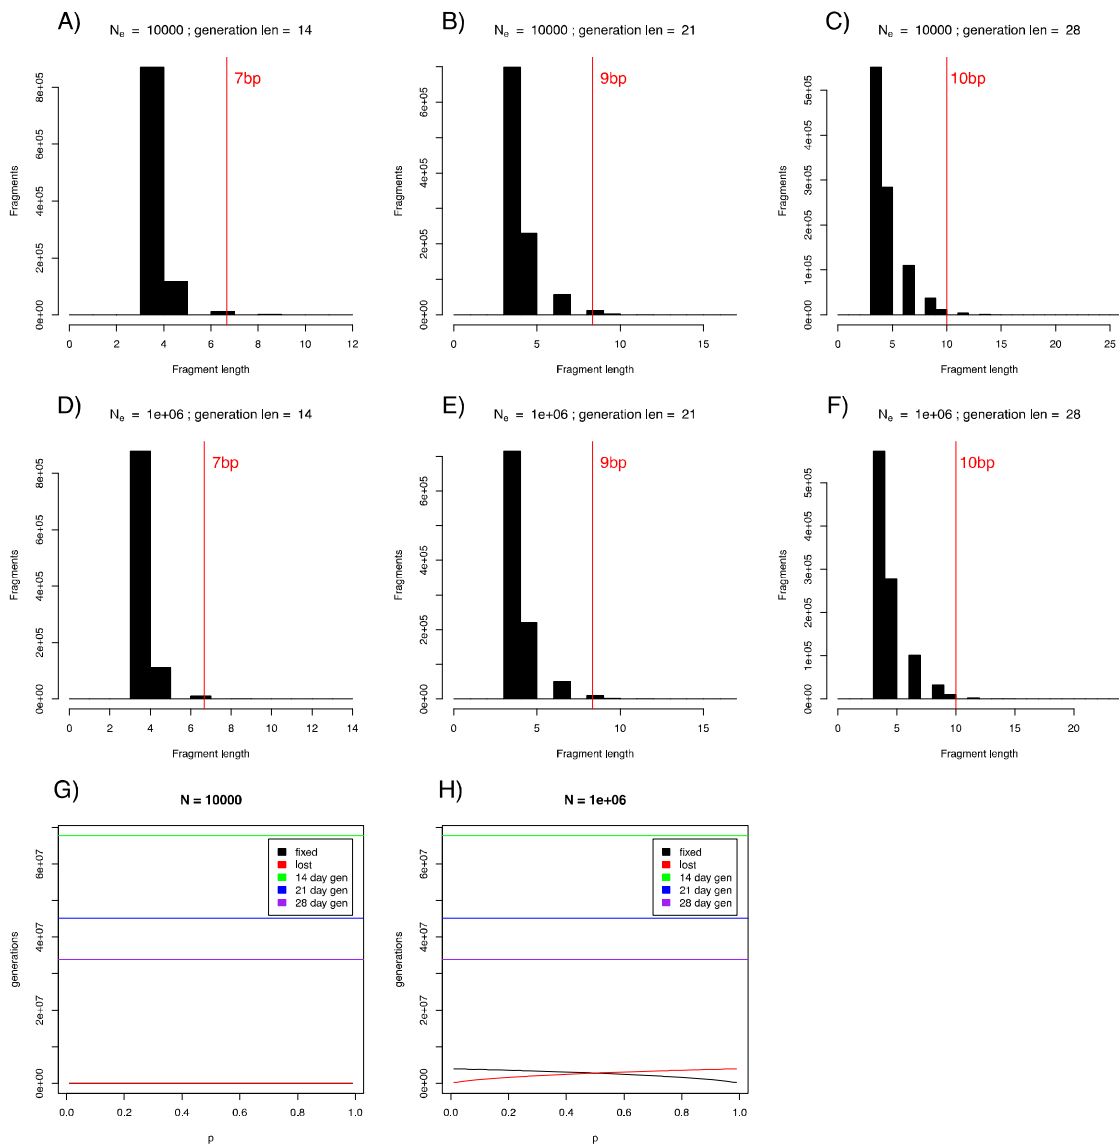

1374  
 1375

1376 **Figure S13. Region on chromosome 3L (3L: 12,187,525-12,209,675) with the *san-***  
1377 ***into-yak* introgressed frequency  $\geq 50\%$  in the hybrid zone on São Tomé. Tracts for all**  
1378 **56 *D. yakuba* lines. Red bars indicate homozygous *D. santomea* tracts, purple bars**  
1379 **are heterozygous tracts, light bars are homozygous *D. yakuba* tracts, and light pink**  
1380 **tracts indicate homozygous donor tracts that were not considered as introgression**  
1381 **tracts because they were either less than 500bp, had less than SNPs with the donor**  
1382 **allele, or contained more than 30% repetitive sequence. The region of interest is**  
1383 **highlighted by a grey rectangle, and lines from the hybrid zone have blue names.**  
1384 **The bottom of the plot contains rectangles indicating annotated genes with an**  
1385 **arrow indicating the direction of transcription and solid black rectangles denoting**  
1386 **coding sequence.**  
1387

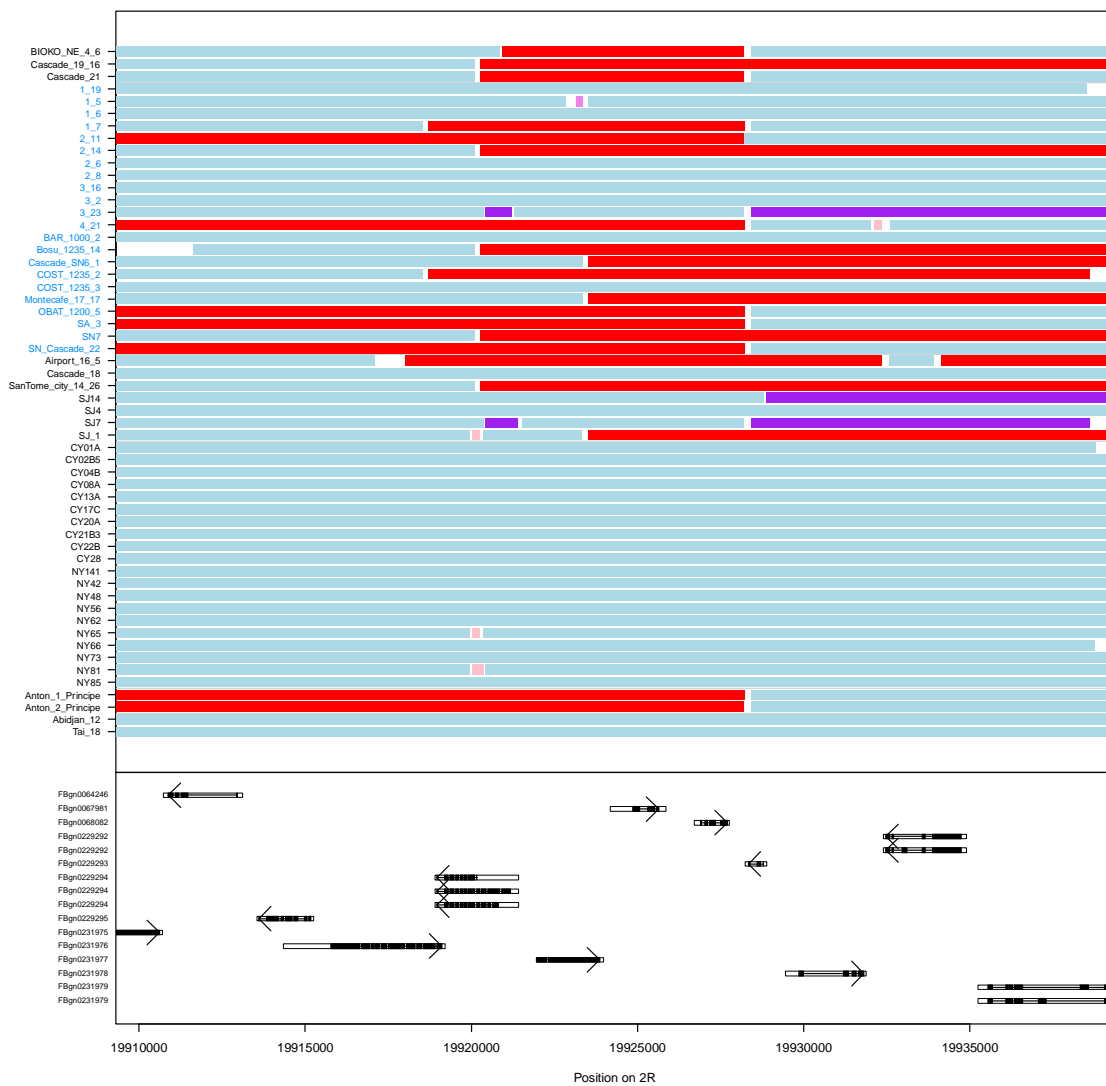

1388  
1389

1390 **Figure S14. Collection map.** Map indicating the number of fly lines used in this study  
1391 that were collected from each geographic location. 'ST:HZ' is the hybrid zone on São  
1392 Tomé, and 'ST: Low' are the lowland areas on the island of São Tomé.  
1393

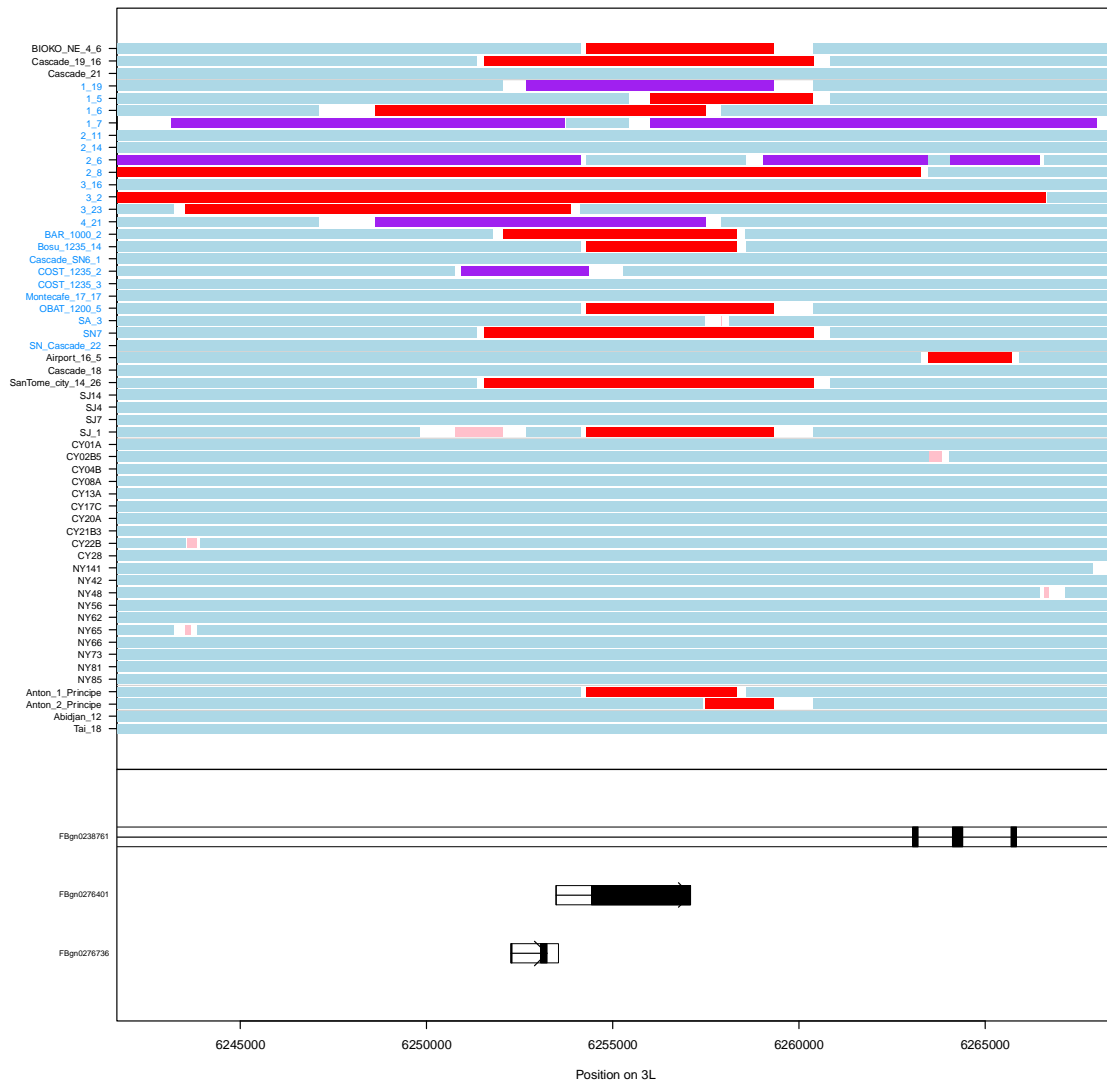

1394  
1395

1396 **Figure S15. Example introgressions.** Example introgressions from *D. santomea* into  
1397 *D. yakuba* for a region on chromosome arm 2R. **A)** Introgression from *D. santomea*  
1398 into the *D. yakuba* line SanTome\_city\_14\_26. 'SNPs' represent the markers for this  
1399 line. 'Coverages' show the number of reads with either the donor (*D. santomea*, red)  
1400 or recipient allele (*D. yakuba*, light blue) at each site. Coverages greater than 25x  
1401 were downscaled to integer values between 0 and 25x. 'Probabilities' are the  
1402 probabilities returned by Int-HMM for all six states at each site (light blue:  
1403 homozygous recipient, purple: heterozygous, red: homozygous donor, light grey:  
1404 homozygous recipient error state, black heterozygous error state, and dark grey  
1405 homozygous donor error state). 'Unfiltered' represent the raw tracks obtained by  
1406 grouping contiguous blocks of SNPs with the same most probable state. 'Tracts' are  
1407 the filtered tracts. **B)** The same region from A) but showing the filtered tracts for all  
1408 56 *D. yakuba* lines. Light pink tracts indicate homozygous donor tracts that were not  
1409 considered as introgression tracts because they were either less than 500bp, had  
1410 less than SNPs with the donor allele, or contained more than 30% repetitive  
1411 sequence. The bottom of the plot contains rectangles indicating annotated genes  
1412 with an arrow indicating the direction of transcription and solid black rectangles  
1413 denoting coding sequence.  
1414

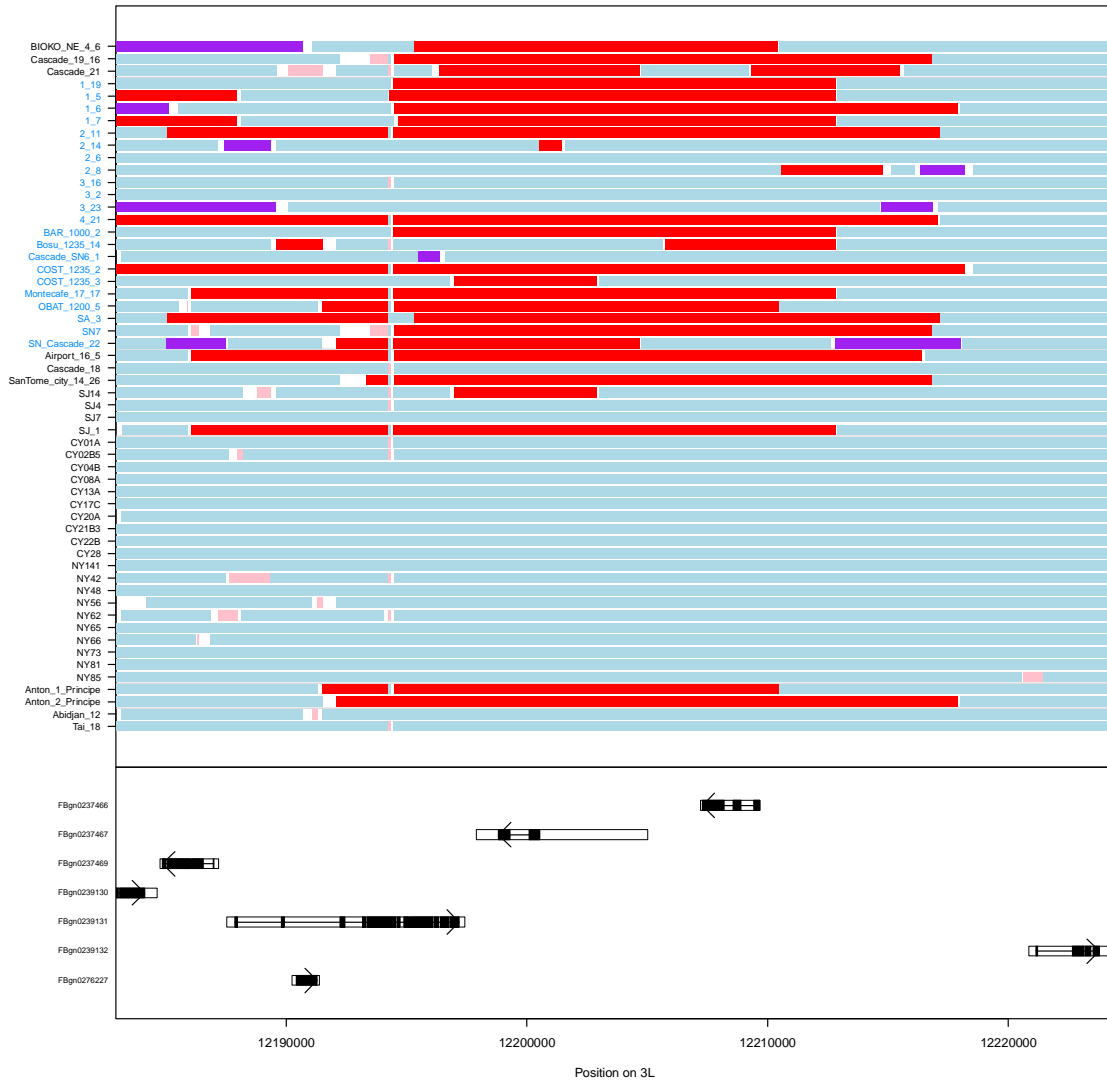

1416 **SUPPLEMENTARY TABLES**

1417 **Table S1. Fly lines used in this study.** Lines used in the study, their geographic origin, and the length and paired status (se =  
 1418 single end, pe = paired end) of Illumina sequencing reads. Average coverage is the average number of reads mapped  
 1419 overlapping a given site in the genome. The markers columns denote the number of markers used in the HMM when  
 1420 identifying a given direction of introgression.

1421

1422

| Species            | Population | Line          | Pair type | Read length | Average coverage | <i>yak-into-san</i> markers | <i>san-into-yak</i> markers | <i>yak-into-tei</i> markers | <i>tei-into-yak</i> markers |
|--------------------|------------|---------------|-----------|-------------|------------------|-----------------------------|-----------------------------|-----------------------------|-----------------------------|
| <i>D. santomea</i> | São Tomé   | BS14          | pe        | 125         | 98.98            | 923,227                     | NA                          | NA                          | NA                          |
| <i>D. santomea</i> | São Tomé   | C550_39       | pe        | 125         | 65.57            | 922,010                     | NA                          | NA                          | NA                          |
| <i>D. santomea</i> | São Tomé   | C650_14       | pe        | 125         | 65.58            | 920,827                     | NA                          | NA                          | NA                          |
| <i>D. santomea</i> | São Tomé   | CAR1600       | pe        | 125         | 62.54            | 922,131                     | NA                          | NA                          | NA                          |
| <i>D. santomea</i> | São Tomé   | Quija630.39   | se        | 100         | 24.16            | 913,747                     | NA                          | NA                          | NA                          |
| <i>D. santomea</i> | São Tomé   | Quija37       | se        | 100         | 11.74            | 908,062                     | NA                          | NA                          | NA                          |
| <i>D. santomea</i> | São Tomé   | Rain42        | pe        | 125         | 69.67            | 919,231                     | NA                          | NA                          | NA                          |
| <i>D. santomea</i> | São Tomé   | sanC1350.14   | se        | 100         | 18.62            | 911,619                     | NA                          | NA                          | NA                          |
| <i>D. santomea</i> | São Tomé   | sanCAR1490.5  | se        | 100         | 15.77            | 909,499                     | NA                          | NA                          | NA                          |
| <i>D. santomea</i> | São Tomé   | sanCOST1250.5 | se        | 100         | 13.27            | 910,422                     | NA                          | NA                          | NA                          |



|                     |          |                |    |     |       |         |    |           |    |
|---------------------|----------|----------------|----|-----|-------|---------|----|-----------|----|
| <i>santomea</i>     |          |                |    |     |       |         |    |           |    |
| <i>D. santomea</i>  | São Tomé | sanCOST1270.6  | se | 100 | 14.76 | 908,533 | NA | NA        | NA |
| <i>D. santomea</i>  | São Tomé | sanOBAT1200.13 | se | 100 | 14.47 | 909,674 | NA | NA        | NA |
| <i>D. santomea</i>  | São Tomé | sanOBAT1200.5  | se | 100 | 16.82 | 908,547 | NA | NA        | NA |
| <i>D. santomea</i>  | São Tomé | sanRain39      | se | 100 | 15.81 | 910,035 | NA | NA        | NA |
| <i>D. santomea</i>  | São Tomé | sanSTO7        | se | 100 | 15.29 | 907,959 | NA | NA        | NA |
| <i>D. santomea</i>  | São Tomé | sanThenas5     | se | 100 | 12.98 | 909,543 | NA | NA        | NA |
| <i>D. santomea</i>  | São Tomé | san_Field3     | pe | 125 | 60.78 | 918,936 | NA | NA        | NA |
| <i>D. teissieri</i> | Bioko    | Balancha_1     | pe | 150 | 30.37 | NA      | NA | 2,440,335 | NA |
| <i>D. teissieri</i> | Bioko    | cascade_2_1    | pe | 150 | 29.2  | NA      | NA | 2,435,953 | NA |
| <i>D. teissieri</i> | Bioko    | cascade_2_2    | pe | 150 | 33.88 | NA      | NA | 2,439,716 | NA |
| <i>D. teissieri</i> | Bioko    | cascade_2_4    | pe | 150 | 26.91 | NA      | NA | 2,438,424 | NA |
| <i>D. teissieri</i> | Bioko    | cascade_4_1    | pe | 150 | 27.07 | NA      | NA | 2,435,999 | NA |
| <i>D. teissieri</i> | Bioko    | cascade_4_2    | pe | 150 | 39.54 | NA      | NA | 2,468,955 | NA |
| <i>D. teissieri</i> | Bioko    | cascade_4_3    | pe | 150 | 23.26 | NA      | NA | 2,430,334 | NA |

|                     |                   |               |    |       |        |    |         |           |           |
|---------------------|-------------------|---------------|----|-------|--------|----|---------|-----------|-----------|
| <i>D. teissieri</i> | Bioko             | House_Bioko   | pe | 150   | 35.7   | NA | NA      | 2,445,383 | NA        |
| <i>D. teissieri</i> | Equatorial Guinea | Bata2         | se | 100   | 20.7   | NA | NA      | 2,275,453 | NA        |
| <i>D. teissieri</i> | Equatorial Guinea | Bata8         | se | 100   | 18.56  | NA | NA      | 2,280,660 | NA        |
| <i>D. teissieri</i> | Gabon             | La_Lope_Gabon | pe | 150   | 36.6   | NA | NA      | 2,426,237 | NA        |
| <i>D. teissieri</i> | Zimbabwe          | Selinda       | pe | 150   | 27.74  | NA | NA      | 2,425,028 | NA        |
| <i>D. teissieri</i> | Zimbabwe          | Zimbabwe      | pe | 150   | 32.17  | NA | NA      | 2,429,980 | NA        |
| <i>D. yakuba</i>    | Bioko             | BIOKO_NE_4_6  | se | 101   | 17.17  | NA | 933,776 | NA        | 1,867,399 |
| <i>D. yakuba</i>    | Bioko             | Cascade_19_16 | se | 101   | 16.5   | NA | 943,502 | NA        | 1,880,181 |
| <i>D. yakuba</i>    | Bioko             | Cascade_21    | se | 101   | 20.59  | NA | 944,109 | NA        | 1,880,538 |
| <i>D. yakuba</i>    | Cameroon          | CY01A         | pe | 48-76 | 196.72 | NA | 947,830 | NA        | 1,884,951 |
| <i>D. yakuba</i>    | Cameroon          | CY02B5        | pe | 48-76 | 69.98  | NA | 947,600 | NA        | 1,884,804 |
| <i>D. yakuba</i>    | Cameroon          | CY04B         | pe | 48-76 | 157.94 | NA | 947,066 | NA        | 1,884,131 |
| <i>D. yakuba</i>    | Cameroon          | CY08A         | pe | 48-76 | 75.04  | NA | 947,474 | NA        | 1,884,652 |
| <i>D. yakuba</i>    | Cameroon          | CY13A         | pe | 48-76 | 72.72  | NA | 946,305 | NA        | 1,883,404 |
| <i>D. yakuba</i>    | Cameroon          | CY17C         | pe | 48-76 | 193.88 | NA | 947,132 | NA        | 1,883,074 |

|                  |                              |        |    |       |        |    |         |    |           |
|------------------|------------------------------|--------|----|-------|--------|----|---------|----|-----------|
| <i>D. yakuba</i> | Cameroon                     | CY20A  | pe | 76    | 183.65 | NA | 947,522 | NA | 1,884,488 |
| <i>D. yakuba</i> | Cameroon                     | CY21B3 | pe | 48-76 | 173.17 | NA | 948,290 | NA | 1,885,320 |
| <i>D. yakuba</i> | Cameroon                     | CY22B  | pe | 54-76 | 69.84  | NA | 945,462 | NA | 1,882,133 |
| <i>D. yakuba</i> | Cameroon                     | CY28   | pe | 54-76 | 110.16 | NA | 946,716 | NA | 1,883,689 |
| <i>D. yakuba</i> | São Tomé<br>- hybrid<br>zone | 1_19   | se | 101   | 18.51  | NA | 948,992 | NA | 1,886,150 |
| <i>D. yakuba</i> | São Tomé<br>- hybrid<br>zone | 1_5    | se | 101   | 19.27  | NA | 946,264 | NA | 1,883,489 |
| <i>D. yakuba</i> | São Tomé<br>- hybrid<br>zone | 1_6    | se | 101   | 20.16  | NA | 946,531 | NA | 1,883,322 |
| <i>D. yakuba</i> | São Tomé<br>- hybrid<br>zone | 1_7    | se | 101   | 22.01  | NA | 945,489 | NA | 1,881,957 |
| <i>D. yakuba</i> | São Tomé<br>- hybrid<br>zone | 2_11   | se | 101   | 19.51  | NA | 947,314 | NA | 1,884,343 |
| <i>D. yakuba</i> | São Tomé<br>- hybrid<br>zone | 2_14   | se | 101   | 19.15  | NA | 943,849 | NA | 1,880,042 |
| <i>D. yakuba</i> | São Tomé<br>- hybrid<br>zone | 2_6    | se | 101   | 23.43  | NA | 947,868 | NA | 1,885,046 |
| <i>D.</i>        | São Tomé                     | 2_8    | se | 101   | 20.38  | NA | 945,740 | NA | 1,882,125 |

|                  |                        |                 |    |     |       |    |         |    |           |
|------------------|------------------------|-----------------|----|-----|-------|----|---------|----|-----------|
| <i>yakuba</i>    | - hybrid zone          |                 |    |     |       |    |         |    |           |
| <i>D. yakuba</i> | São Tomé - hybrid zone | 3_16            | se | 101 | 19.82 | NA | 950,445 | NA | 1,886,111 |
| <i>D. yakuba</i> | São Tomé - hybrid zone | 3_2             | se | 101 | 21.89 | NA | 946,422 | NA | 1,883,168 |
| <i>D. yakuba</i> | São Tomé - hybrid zone | 3_23            | se | 101 | 22.11 | NA | 947,241 | NA | 1,883,748 |
| <i>D. yakuba</i> | São Tomé - hybrid zone | 4_21            | se | 101 | 22.44 | NA | 945,747 | NA | 1,882,275 |
| <i>D. yakuba</i> | São Tomé - hybrid zone | BAR_1000_2      | se | 101 | 21.23 | NA | 946,415 | NA | 1,883,076 |
| <i>D. yakuba</i> | São Tomé - hybrid zone | Bosu_1235_14    | se | 101 | 17.22 | NA | 946,208 | NA | 1,882,526 |
| <i>D. yakuba</i> | São Tomé - hybrid zone | Cascade_SN6_1   | se | 101 | 18.85 | NA | 946,885 | NA | 1,883,622 |
| <i>D. yakuba</i> | São Tomé - hybrid zone | COST_1235_2     | se | 101 | 17.69 | NA | 943,865 | NA | 1,880,498 |
| <i>D. yakuba</i> | São Tomé - hybrid zone | COST_1235_3     | se | 101 | 15.42 | NA | 945,360 | NA | 1,881,758 |
| <i>D.</i>        | São Tomé               | Montecafe_17_17 | se | 101 | 19.97 | NA | 946,512 | NA | 1,882,615 |

|                  |                        |               |    |       |        |    |         |    |           |
|------------------|------------------------|---------------|----|-------|--------|----|---------|----|-----------|
| <i>yakuba</i>    | - hybrid zone          |               |    |       |        |    |         |    |           |
| <i>D. yakuba</i> | São Tomé - hybrid zone | OBAT_1200_5   | se | 101   | 22.7   | NA | 944,830 | NA | 1,881,489 |
| <i>D. yakuba</i> | São Tomé - hybrid zone | SA_3          | se | 101   | 18.64  | NA | 945,733 | NA | 1,882,474 |
| <i>D. yakuba</i> | São Tomé - hybrid zone | SN7           | se | 101   | 23.66  | NA | 943,004 | NA | 1,879,706 |
| <i>D. yakuba</i> | São Tomé - hybrid zone | SN_Cascade_22 | se | 101   | 21.78  | NA | 946,489 | NA | 1,883,209 |
| <i>D. yakuba</i> | Kenya                  | NY141         | pe | 54-76 | 143.54 | NA | 945,542 | NA | 1,882,198 |
| <i>D. yakuba</i> | Kenya                  | NY42          | pe | 54-76 | 118.02 | NA | 946,394 | NA | 1,883,219 |
| <i>D. yakuba</i> | Kenya                  | NY48          | pe | 54-76 | 84.99  | NA | 944,685 | NA | 1,881,592 |
| <i>D. yakuba</i> | Kenya                  | NY56          | pe | 54-76 | 88.65  | NA | 944,598 | NA | 1,881,734 |
| <i>D. yakuba</i> | Kenya                  | NY62          | pe | 54-76 | 94.51  | NA | 947,230 | NA | 1,884,258 |
| <i>D. yakuba</i> | Kenya                  | NY65          | pe | 54-76 | 91.46  | NA | 945,551 | NA | 1,882,950 |
| <i>D. yakuba</i> | Kenya                  | NY66          | pe | 54-76 | 148.65 | NA | 945,667 | NA | 1,882,021 |
| <i>D. yakuba</i> | Kenya                  | NY73          | pe | 54-76 | 92.08  | NA | 945,136 | NA | 1,881,926 |

|                  |                        |                    |    |       |        |    |         |    |           |
|------------------|------------------------|--------------------|----|-------|--------|----|---------|----|-----------|
| <i>D. yakuba</i> | Kenya                  | NY81               | pe | 54-76 | 148.42 | NA | 945,534 | NA | 1,882,030 |
| <i>D. yakuba</i> | Kenya                  | NY85               | pe | 54-76 | 99.03  | NA | 947,888 | NA | 1,884,845 |
| <i>D. yakuba</i> | São Tomé<br>- lowlands | Airport_16_5       | se | 101   | 20.11  | NA | 947,456 | NA | 1,884,225 |
| <i>D. yakuba</i> | São Tomé<br>- lowlands | Cascade_18         | se | 101   | 23.96  | NA | 950,239 | NA | 1,886,650 |
| <i>D. yakuba</i> | São Tomé<br>- lowlands | SanTome_city_14_26 | se | 101   | 22.75  | NA | 944,997 | NA | 1,881,836 |
| <i>D. yakuba</i> | São Tomé<br>- lowlands | SJ14               | se | 101   | 15.77  | NA | 941,359 | NA | 1,877,179 |
| <i>D. yakuba</i> | São Tomé<br>- lowlands | SJ4                | se | 101   | 25.82  | NA | 951,384 | NA | 1,888,413 |
| <i>D. yakuba</i> | São Tomé<br>- lowlands | SJ7                | se | 101   | 19.51  | NA | 944,909 | NA | 1,881,298 |
| <i>D. yakuba</i> | São Tomé<br>- lowlands | SJ_1               | se | 101   | 21.35  | NA | 946,861 | NA | 1,883,685 |
| <i>D. yakuba</i> | Príncipe               | Anton_1_Principe   | se | 101   | 19.54  | NA | 944,145 | NA | 1,880,516 |
| <i>D. yakuba</i> | Príncipe               | Anton_2_Principe   | se | 101   | 21.38  | NA | 942,331 | NA | 1,878,698 |
| <i>D. yakuba</i> | Ivory<br>Coast         | Abidjan_12         | se | 101   | 23.79  | NA | 947,025 | NA | 1,884,229 |
| <i>D. yakuba</i> | Ivory<br>Coast         | Tai_18             | se | 101   | 22.17  | NA | 951,190 | NA | 1,887,883 |

1423

1424

1425 **Table S2. False positive tracts from identified by Int-HMM from the simulated data.** Counts denote the number of tracts,  
 1426 percentages refer to amount of genomic sequence covered by those tracts, and cum lengths are the combined tract lengths.  
 1427

| direction                    | homozygous count | homozygous percentage | homozygous cum length | heterozygous count | heterozygous percentage | heterozygous cumulative length |
|------------------------------|------------------|-----------------------|-----------------------|--------------------|-------------------------|--------------------------------|
| <i>yak</i> -into- <i>san</i> | 2                | 0.177                 | 2087bp                | 0                  | 0                       | 0bp                            |
| <i>san</i> -into- <i>yak</i> | 3                | 0.253                 | 5652bp                | 0                  | 0                       | 0bp                            |
| <i>yak</i> -into- <i>tei</i> | 1                | 0.0702                | 800bp                 | 0                  | 0                       | 0bp                            |
| <i>tei</i> -into- <i>yak</i> | 0                | 0                     | 0bp                   | 0                  | 0                       | 0bp                            |

1428  
 1429  
 1430

1431 **Table S3. Percentage of genome that was introgressed.** Percentage of the genome that was introgressed for each line as  
 1432 determined by the cumulative length of introgression tracts identified by the HMM.  
 1433

| Species            | Population | Line           | <i>yak</i> -into- <i>san</i> | <i>san</i> -into- <i>yak</i> | <i>yak</i> -into- <i>tei</i> | <i>tei</i> -into- <i>yak</i> |
|--------------------|------------|----------------|------------------------------|------------------------------|------------------------------|------------------------------|
| <i>D. santomea</i> | São Tomé   | Quija630.39    | 0.1006                       | NA                           | NA                           | NA                           |
| <i>D. santomea</i> | São Tomé   | Quija37        | 0.4365                       | NA                           | NA                           | NA                           |
| <i>D. santomea</i> | São Tomé   | sanC1350.14    | 0.1221                       | NA                           | NA                           | NA                           |
| <i>D. santomea</i> | São Tomé   | sanCAR1490.5   | 0.5787                       | NA                           | NA                           | NA                           |
| <i>D. santomea</i> | São Tomé   | sanCOST1250.5  | 0.1037                       | NA                           | NA                           | NA                           |
| <i>D. santomea</i> | São Tomé   | sanCOST1270.6  | 0.1698                       | NA                           | NA                           | NA                           |
| <i>D. santomea</i> | São Tomé   | sanOBAT1200.13 | 0.3148                       | NA                           | NA                           | NA                           |
| <i>D. santomea</i> | São Tomé   | sanOBAT1200.5  | 0.1028                       | NA                           | NA                           | NA                           |
| <i>D. santomea</i> | São Tomé   | sanRain39      | 0.1501                       | NA                           | NA                           | NA                           |
| <i>D. santomea</i> | São Tomé   | sanST07        | 0.5866                       | NA                           | NA                           | NA                           |
| <i>D. santomea</i> | São Tomé   | sanThena5      | 0.34                         | NA                           | NA                           | NA                           |
| <i>D. santomea</i> | São Tomé   | Rain42         | 0.5293                       | NA                           | NA                           | NA                           |
| <i>D. santomea</i> | São Tomé   | BS14           | 0.4534                       | NA                           | NA                           | NA                           |



|                     |                   |               |        |        |        |        |
|---------------------|-------------------|---------------|--------|--------|--------|--------|
| <i>santomea</i>     |                   |               |        |        |        |        |
| <i>D. santomea</i>  | São Tomé          | C650_14       | 0.1293 | NA     | NA     | NA     |
| <i>D. santomea</i>  | São Tomé          | C550_39       | 0.5837 | NA     | NA     | NA     |
| <i>D. santomea</i>  | São Tomé          | san_Field3    | 1.0401 | NA     | NA     | NA     |
| <i>D. santomea</i>  | São Tomé          | CAR1600       | 0.212  | NA     | NA     | NA     |
| <i>D. teissieri</i> | Bioko             | Balancha_1    | NA     | NA     | 0.0053 | NA     |
| <i>D. teissieri</i> | Bioko             | cascade_4_3   | NA     | NA     | 0.0112 | NA     |
| <i>D. teissieri</i> | Bioko             | House_Bioko   | NA     | NA     | 0.0123 | NA     |
| <i>D. teissieri</i> | Bioko             | cascade_4_2   | NA     | NA     | 0.0107 | NA     |
| <i>D. teissieri</i> | Bioko             | cascade_4_1   | NA     | NA     | 0.0053 | NA     |
| <i>D. teissieri</i> | Bioko             | cascade_2_4   | NA     | NA     | 0.0093 | NA     |
| <i>D. teissieri</i> | Bioko             | cascade_2_2   | NA     | NA     | 0.0052 | NA     |
| <i>D. teissieri</i> | Bioko             | cascade_2_1   | NA     | NA     | 0      | NA     |
| <i>D. teissieri</i> | Equatorial Guinea | Bata8         | NA     | NA     | 0.0008 | NA     |
| <i>D. teissieri</i> | Equatorial Guinea | Bata2         | NA     | NA     | 0.004  | NA     |
| <i>D. teissieri</i> | Gabon             | La_Lope_Gabon | NA     | NA     | 0.0065 | NA     |
| <i>D. teissieri</i> | Zimbabwe          | Zimbabwe      | NA     | NA     | 0.006  | NA     |
| <i>D. teissieri</i> | Zimbabwe          | Selinda       | NA     | NA     | 0.0129 | NA     |
| <i>D. yakuba</i>    | Bioko             | BIOKO_NE_4_6  | NA     | 0.2751 | NA     | 0.0088 |
| <i>D. yakuba</i>    | Bioko             | Cascade_19_16 | NA     | 0.3349 | NA     | 0.0144 |
| <i>D. yakuba</i>    | Bioko             | Cascade_21    | NA     | 0.321  | NA     | 0.0011 |
| <i>D. yakuba</i>    | Cameroon          | CY28          | NA     | 0.1097 | NA     | 0.0089 |
| <i>D. yakuba</i>    | Cameroon          | CY22B         | NA     | 0.0688 | NA     | 0.0007 |

|                  |                        |                 |    |        |    |        |
|------------------|------------------------|-----------------|----|--------|----|--------|
| <i>D. yakuba</i> | Cameroon               | CY21B3          | NA | 0.0146 | NA | 0.0054 |
| <i>D. yakuba</i> | Cameroon               | CY20A           | NA | 0.0919 | NA | 0.0215 |
| <i>D. yakuba</i> | Cameroon               | CY17C           | NA | 0.0168 | NA | 0.001  |
| <i>D. yakuba</i> | Cameroon               | CY13A           | NA | 0.0922 | NA | 0.0073 |
| <i>D. yakuba</i> | Cameroon               | CY08A           | NA | 0.031  | NA | 0.0137 |
| <i>D. yakuba</i> | Cameroon               | CY04B           | NA | 0.0492 | NA | 0.0144 |
| <i>D. yakuba</i> | Cameroon               | CY01A           | NA | 0.0483 | NA | 0.019  |
| <i>D. yakuba</i> | Cameroon               | CY02B5          | NA | 0.0342 | NA | 0.0084 |
| <i>D. yakuba</i> | São Tomé - hybrid zone | Cascade_SN6_1   | NA | 0.3078 | NA | 0.0032 |
| <i>D. yakuba</i> | São Tomé - hybrid zone | SN7             | NA | 0.3645 | NA | 0.0144 |
| <i>D. yakuba</i> | São Tomé - hybrid zone | SN_Cascade_22   | NA | 0.3039 | NA | 0.0175 |
| <i>D. yakuba</i> | São Tomé - hybrid zone | 1_19            | NA | 0.3896 | NA | 0.0065 |
| <i>D. yakuba</i> | São Tomé - hybrid zone | 1_5             | NA | 0.3047 | NA | 0.0138 |
| <i>D. yakuba</i> | São Tomé - hybrid zone | 1_6             | NA | 0.339  | NA | 0.0129 |
| <i>D. yakuba</i> | São Tomé - hybrid zone | 1_7             | NA | 0.3717 | NA | 0.0124 |
| <i>D. yakuba</i> | São Tomé - hybrid zone | 2_11            | NA | 0.2351 | NA | 0.0107 |
| <i>D. yakuba</i> | São Tomé - hybrid zone | 2_14            | NA | 0.2357 | NA | 0.0007 |
| <i>D. yakuba</i> | São Tomé - hybrid zone | 2_6             | NA | 0.3771 | NA | 0.006  |
| <i>D. yakuba</i> | São Tomé - hybrid zone | 2_8             | NA | 0.357  | NA | 0.0244 |
| <i>D. yakuba</i> | São Tomé - hybrid zone | 3_16            | NA | 0.012  | NA | 0.0176 |
| <i>D. yakuba</i> | São Tomé - hybrid zone | 3_2             | NA | 0.4387 | NA | 0.0101 |
| <i>D. yakuba</i> | São Tomé - hybrid zone | 3_23            | NA | 0.4047 | NA | 0.0073 |
| <i>D. yakuba</i> | São Tomé - hybrid zone | 4_21            | NA | 0.3901 | NA | 0.0153 |
| <i>D. yakuba</i> | São Tomé - hybrid zone | COST_1235_2     | NA | 0.304  | NA | 0.0014 |
| <i>D. yakuba</i> | São Tomé - hybrid zone | COST_1235_3     | NA | 0.1677 | NA | 0.004  |
| <i>D. yakuba</i> | São Tomé - hybrid zone | Montecafe_17_17 | NA | 0.3496 | NA | 0      |

|                  |                        |                    |    |        |    |        |
|------------------|------------------------|--------------------|----|--------|----|--------|
| <i>D. yakuba</i> | São Tomé - hybrid zone | BAR_1000_2         | NA | 0.3118 | NA | 0.0072 |
| <i>D. yakuba</i> | São Tomé - hybrid zone | Bosu_1235_14       | NA | 0.3575 | NA | 0.0008 |
| <i>D. yakuba</i> | São Tomé - hybrid zone | OBAT_1200_5        | NA | 0.3394 | NA | 0.0072 |
| <i>D. yakuba</i> | São Tomé - hybrid zone | SA_3               | NA | 0.2419 | NA | 0.0053 |
| <i>D. yakuba</i> | Kenya                  | NY81               | NA | 0.1487 | NA | 0.0084 |
| <i>D. yakuba</i> | Kenya                  | NY85               | NA | 0.0211 | NA | 0.0008 |
| <i>D. yakuba</i> | Kenya                  | NY66               | NA | 0.1322 | NA | 0.0049 |
| <i>D. yakuba</i> | Kenya                  | NY65               | NA | 0.0813 | NA | 0.0036 |
| <i>D. yakuba</i> | Kenya                  | NY62               | NA | 0.0667 | NA | 0.0069 |
| <i>D. yakuba</i> | Kenya                  | NY42               | NA | 0.0821 | NA | 0.0097 |
| <i>D. yakuba</i> | Kenya                  | NY48               | NA | 0.0608 | NA | 0.0092 |
| <i>D. yakuba</i> | Kenya                  | NY73               | NA | 0.0581 | NA | 0.0074 |
| <i>D. yakuba</i> | Kenya                  | NY56               | NA | 0.0739 | NA | 0.001  |
| <i>D. yakuba</i> | Kenya                  | NY141              | NA | 0.0301 | NA | 0.0084 |
| <i>D. yakuba</i> | São Tomé - lowlands    | Airport_16_5       | NA | 0.2525 | NA | 0.0021 |
| <i>D. yakuba</i> | São Tomé - lowlands    | Cascade_18         | NA | 0.013  | NA | 0.0114 |
| <i>D. yakuba</i> | São Tomé - lowlands    | SanTome_city_14_26 | NA | 0.3421 | NA | 0.0133 |
| <i>D. yakuba</i> | São Tomé - lowlands    | SJ14               | NA | 0.171  | NA | 0.0044 |
| <i>D. yakuba</i> | São Tomé - lowlands    | SJ4                | NA | 0.0264 | NA | 0.0087 |
| <i>D. yakuba</i> | São Tomé - lowlands    | SJ7                | NA | 0.2344 | NA | 0.0017 |
| <i>D. yakuba</i> | São Tomé - lowlands    | SJ_1               | NA | 0.3074 | NA | 0      |
| <i>D. yakuba</i> | Príncipe               | Anton_1_Principe   | NA | 0.3142 | NA | 0.0072 |
| <i>D. yakuba</i> | Príncipe               | Anton_2_Principe   | NA | 1.2012 | NA | 0      |
| <i>D. yakuba</i> | Ivory Coast            | Tai_18             | NA | 0.0182 | NA | 0.0103 |
| <i>D. yakuba</i> | Ivory Coast            | Abidjan_12         | NA | 0.1756 | NA | 0.0143 |

1434 **Table S4. Distribution of markers used by Int-HMM is similar across sequence types in all the four introgressions directions.**

| Direction           | type               | markers | total      | Markers per kb |
|---------------------|--------------------|---------|------------|----------------|
| <i>yak-into-san</i> | 10kb inter         | 166,112 | 22,780,104 | 7.292          |
| <i>yak-into-san</i> | 2kb upstream inter | 92,911  | 10,100,186 | 9.1989         |
| <i>yak-into-san</i> | 3'prime UTR        | 31,596  | 4,121,972  | 7.6653         |
| <i>yak-into-san</i> | 5'prime UTR        | 27,077  | 3,346,831  | 8.0903         |
| <i>yak-into-san</i> | CDS                | 145,211 | 22,059,257 | 6.5828         |
| <i>yak-into-san</i> | exon               | 2,375   | 317,599    | 7.478          |
| <i>yak-into-san</i> | intergenic         | 50,263  | 8,754,040  | 5.7417         |
| <i>yak-into-san</i> | intron             | 415,743 | 48,178,319 | 8.6293         |
| <i>san-into-yak</i> | 10kb inter         | 166,866 | 22,780,104 | 7.3251         |
| <i>san-into-yak</i> | 2kb upstream inter | 98,371  | 10,100,186 | 9.7395         |
| <i>san-into-yak</i> | 3'prime UTR        | 30,881  | 4,121,972  | 7.4918         |
| <i>san-into-yak</i> | 5'prime UTR        | 26,267  | 3,346,831  | 7.8483         |
| <i>san-into-yak</i> | CDS                | 156,748 | 22,059,257 | 7.1058         |
| <i>san-into-yak</i> | exon               | 2,207   | 317,599    | 6.949          |
| <i>san-into-yak</i> | intergenic         | 49,851  | 8,754,040  | 5.6946         |
| <i>san-into-yak</i> | intron             | 421,513 | 48,178,319 | 8.749          |
| <i>yak-into-tei</i> | 10kb inter         | 435,107 | 22,780,104 | 19.1003        |
| <i>yak-into-tei</i> | 2kb upstream inter | 237,045 | 10,100,186 | 23.4694        |
| <i>yak-into-tei</i> | 3'prime UTR        | 83,077  | 4,121,972  | 20.1547        |
| <i>yak-into-tei</i> | 5'prime UTR        | 74,830  | 3,346,831  | 22.3585        |
| <i>yak-into-tei</i> | CDS                | 475,558 | 22,059,257 | 21.5582        |
| <i>yak-into-tei</i> | exon               | 6,035   | 317,599    | 19.0019        |
| <i>yak-into-tei</i> | intergenic         | 131,295 | 8,754,040  | 14.9982        |

|                     |                    |           |            |         |
|---------------------|--------------------|-----------|------------|---------|
| <i>yak-into-tei</i> | intron             | 1,105,338 | 48,178,319 | 22.9426 |
| <i>tei-into-yak</i> | 10kb inter         | 307,221   | 22,780,104 | 13.4864 |
| <i>tei-into-yak</i> | 2kb upstream inter | 168,122   | 10,100,186 | 16.6454 |
| <i>tei-into-yak</i> | 3'prime UTR        | 67,187    | 4,121,972  | 16.2997 |
| <i>tei-into-yak</i> | 5'prime UTR        | 61,183    | 3,346,831  | 18.2809 |
| <i>tei-into-yak</i> | CDS                | 401,401   | 22,059,257 | 18.1965 |
| <i>tei-into-yak</i> | exon               | 4,589     | 317,599    | 14.449  |
| <i>tei-into-yak</i> | intergenic         | 91,980    | 8,754,040  | 10.5071 |
| <i>tei-into-yak</i> | intron             | 788,765   | 48,178,319 | 16.3718 |

1436  
1437  
1438  
1439  
1440  
1441  
1442  
1443  
1444  
1445

**Table S5. Sequence types containing introgressions.** The genome was partitioned by sequence type with each region being assigned to a single sequence type with the following hierarchy: CDS (coding sequence), exon, 5prime UTR, 3prime UTR, intron, 2kb upstream inter (intergenic sequence 2kb upstream of a gene), 10kb inter (intergenic sequence within 10kb of a gene), and intergenic (intergenic sequence more than 10kb from a gene). 'Introgressed percentage' is the percentage of introgressions overlapping a given sequence type for that direction, 'Genomic percentage' is the percentage of the genome represented by a given sequence type, and 'Enrichment' = (Introgressed percentage) / (Genomic percentage). P-values were calculated with permutation tests as described in the Methods.

| Direction           | Sequence type      | Length (kb) | Introgressed percentage | Genomic percentage | Enrichment | P-value |
|---------------------|--------------------|-------------|-------------------------|--------------------|------------|---------|
| <i>yak-into-san</i> | 10kb inter         | 553.5       | 23.5                    | 19.0               | 1.23       | 0.0020  |
| <i>yak-into-san</i> | 2kb upstream inter | 130.1       | 5.5                     | 8.5                | 0.65       | 0.1980  |
| <i>yak-into-san</i> | 3prime UTR         | 23.4        | 1.0                     | 3.5                | 0.29       | 0.0010  |
| <i>yak-into-san</i> | 5prime UTR         | 6.4         | 0.3                     | 2.8                | 0.10       | 0.3020  |
| <i>yak-into-san</i> | CDS                | 148.8       | 6.3                     | 18.4               | 0.34       | 0.2960  |
| <i>yak-into-san</i> | exon               | 0.2         | 0.0                     | 0.3                | 0.03       | 0.2310  |

|                     |                    |        |      |      |      |        |
|---------------------|--------------------|--------|------|------|------|--------|
| <i>yak-into-san</i> | intergenic         | 333.2  | 14.1 | 7.4  | 1.92 | 0.7320 |
| <i>yak-into-san</i> | intron             | 1160.3 | 49.3 | 40.2 | 1.23 | 0.9910 |
|                     |                    |        |      |      |      |        |
| <i>san-into-yak</i> | 10kb inter         | 611.8  | 18.2 | 19.0 | 0.96 | 0.8110 |
| <i>san-into-yak</i> | 2kb upstream inter | 166.8  | 5.0  | 8.5  | 0.59 | 0.7940 |
| <i>san-into-yak</i> | 3prime UTR         | 33.1   | 1.0  | 3.5  | 0.28 | 0.0360 |
| <i>san-into-yak</i> | 5prime UTR         | 18.7   | 0.6  | 2.8  | 0.20 | 0.0050 |
| <i>san-into-yak</i> | CDS                | 252.5  | 7.5  | 18.4 | 0.41 | 0.0440 |
| <i>san-into-yak</i> | exon               | 2.1    | 0.1  | 0.3  | 0.23 | 0.0120 |
| <i>san-into-yak</i> | intergenic         | 403.4  | 12.0 | 7.4  | 1.63 | 0.9550 |
| <i>san-into-yak</i> | intron             | 1869.2 | 55.7 | 40.2 | 1.39 | 0.1090 |
|                     |                    |        |      |      |      |        |
| <i>yak-into-tei</i> | 10kb inter         | 18.0   | 31.0 | 19.0 | 1.63 | 0.5630 |
| <i>yak-into-tei</i> | 2kb upstream inter | 10.3   | 17.7 | 8.5  | 2.10 | 0.9510 |
| <i>yak-into-tei</i> | 3prime UTR         | 0.3    | 0.5  | 3.5  | 0.15 | 0.1570 |
| <i>yak-into-tei</i> | 5prime UTR         | 0.3    | 0.5  | 2.8  | 0.18 | 0.7430 |
| <i>yak-into-tei</i> | CDS                | 9.7    | 16.6 | 18.4 | 0.90 | 1.0000 |
| <i>yak-into-tei</i> | exon               | 0.0    | 0.0  | 0.3  | 0.00 | 0.0000 |
| <i>yak-into-tei</i> | intergenic         | 4.1    | 7.0  | 7.4  | 0.94 | 0.0470 |
| <i>yak-into-tei</i> | intron             | 15.6   | 26.7 | 40.2 | 0.66 | 0.0000 |
|                     |                    |        |      |      |      |        |
| <i>tei-into-yak</i> | 10kb inter         | 14.5   | 22.5 | 19.0 | 1.18 | 0.8800 |
| <i>tei-into-yak</i> | 2kb upstream inter | 8.1    | 12.6 | 8.5  | 1.49 | 0.9940 |
| <i>tei-into-yak</i> | 3prime UTR         | 0.6    | 0.9  | 3.5  | 0.25 | 0.0510 |
| <i>tei-into-yak</i> | 5prime UTR         | 1.0    | 1.6  | 2.8  | 0.56 | 0.1960 |
| <i>tei-into-yak</i> | CDS                | 18.5   | 28.6 | 18.4 | 1.55 | 0.8940 |

|                     |            |      |      |      |      |        |
|---------------------|------------|------|------|------|------|--------|
| <i>tei-into-yak</i> | exon       | 0.0  | 0.0  | 0.3  | 0.00 | 0.0000 |
| <i>tei-into-yak</i> | intergenic | 2.3  | 3.6  | 7.4  | 0.49 | 0.6500 |
| <i>tei-into-yak</i> | intron     | 19.5 | 30.3 | 40.2 | 0.75 | 0.0020 |

1446   **REFERENCES**

1447

- 1448   1.     Rieseberg LH, Linder CR, Seiler GJ. Chromosomal and genic barriers to  
1449         introgression in *Helianthus*. *Genetics*. 1995; 141:1163-71.
- 1450   2.     Wu C-I. The genic view of the process of speciation. *J Evol Biol*. 2001;14:  
1451         851–865.
- 1452   3.     Nosil P. Speciation with gene flow could be common. *Mol Ecol*. 2008;17:  
1453         2103–2106.
- 1454   4.     Schumer M, Cui R, Rosenthal GG, Andolfatto P. Reproductive isolation of  
1455         hybrid populations driven by genetic incompatibilities. *PLoS Genet*. Public  
1456         Library of Science; 2015;11: e1005041.
- 1457   5.     Kulathinal RJ, Stevison LS, Noor MAF. The genomics of speciation in  
1458         *Drosophila*: diversity, divergence, and introgression estimated using low-  
1459         coverage genome sequencing. *PLoS Genet*. Public Library of Science; 2009;5:  
1460         e1000550.
- 1461   6.     *Heliconius* Genome (THG) Consortium. Butterfly genome reveals  
1462         promiscuous exchange of mimicry adaptations among species. *Nature*.  
1463         2012;487: 94–98.
- 1464   7.     Martin SH, Dasmahapatra KK, Nadeau NJ, Salazar C, Walters JR, Simpson F, et  
1465         al. Genome-wide evidence for speciation with gene flow in *Heliconius*  
1466         butterflies. *Genome Res*. 2013;23: 1817–1828.
- 1467   8.     Garrigan D, Kingan SB, Geneva AJ, Andolfatto P, Clark AG, Thornton KR, et al.  
1468         Genome sequencing reveals complex speciation in the *Drosophila simulans*  
1469         clade. *Genome Res*. 2012;22: 1499–1511.
- 1470   9.     Schumer M, Cui R, Powell DL, Dresner R, Rosenthal GG, Andolfatto P. High-  
1471         resolution mapping reveals hundreds of genetic incompatibilities in  
1472         hybridizing fish species. *Elife*. 2014;3: e02535.
- 1473   10.    Fraïsse C, Belkhir K, Welch JJ, Bierne N. Local interspecies introgression is  
1474         the main cause of extreme levels of intraspecific differentiation in mussels.  
1475         *Mol Ecol*. 2016;25: 269–286.
- 1476   11.    Lindtke D, Gonzalez-Martinez SC, Macaya-Sanz D, Lexer C. Admixture  
1477         mapping of quantitative traits in *Populus* hybrid zones: power and  
1478         limitations. *Heredity* (Edinb). 2013;111: 474–485.
- 1479   12.    Harrison RG, Larson EL. Heterogeneous genome divergence, differential



- 1480            introgression, and the origin and structure of hybrid zones. *Mol Ecol.*  
1481            2016;25: 2454–2466.
- 1482    13.    Abbott RJ, Barton NH, Good JM. Genomics of hybridization and its  
1483            evolutionary consequences. *Mol Ecol.* 2016;25: 2325–2332.
- 1484    14.    Coyne JA, Orr HA. *Speciation*. Sinauer Associates Incorporated; 2004.
- 1485    15.    Dobzhansky T. *Genetics and the Origin of Species (Classics of Modern*  
1486            *Evolution Series)*. 1937. doi:10.1234/12345678
- 1487    16.    Mayr E. *Animal species and evolution*. Cambridge, MA and London, England:  
1488            Harvard University Press; 1963.
- 1489    17.    Arnold ML. *Natural Hybridization and Evolution*. Oxford University Press.  
1490            1997.
- 1491    18.    Arnold ML. *Evolution through genetic exchange*. Oxford University Press.  
1492            2006.
- 1493    19.    Hedrick PW. Adaptive introgression in animals: examples and comparison to  
1494            new mutation and standing variation as sources of adaptive variation. *Mol*  
1495            *Ecol.* 2013;22: 4606–4618.
- 1496    20.    Arnold ML, Martin NH. Adaptation by introgression. *Journal of Biology* 2009  
1497            6:4. BioMed Central; 2009;8: 82.
- 1498    21.    Fontaine MC, Pease JB, Steele A, Waterhouse RM, Neafsey DE, Sharakhov IV,  
1499            et al. Extensive introgression in a malaria vector species complex revealed  
1500            by phylogenomics. *Science*. 2015;347: 1258524–1258524.
- 1501    22.    Zhang W, Dasmahapatra KK, Mallet J, Moreira GRP, Kronforst MR. Genome-  
1502            wide introgression among distantly related *Heliconius* butterfly species.  
1503            *Genome Biol.* BioMed Central; 2016;17: 25. doi:10.1186/s13059-016-0889-  
1504            0
- 1505    23.    Baack EJ, Rieseberg LH. A genomic view of introgression and hybrid  
1506            speciation. *Curr Opin Genet Dev.* 2007;17: 513–518.
- 1507    24.    Rosenzweig BK, Pease JB, Besansky NJ, Hahn MW. Powerful methods for  
1508            detecting introgressed regions from population genomic data. *Mol Ecol.*  
1509            2016;25: 2387–2397.
- 1510    25.    Price AL, Tandon A, Patterson N, Barnes KC, Rafaels N, Ruczinski I, et al.  
1511            Sensitive detection of chromosomal segments of distinct ancestry in  
1512            admixed populations. *PLoS Genet.* 2009;5: e1000519.
- 1513    26.    Guan Y. *Detecting Structure of Haplotypes and Local Ancestry*. *Genetics*.

- 1514 Genetics; 2014;196: 625–642.
- 1515 27. Lawson DJ, Hellenthal G, Myers S, Falush D. Inference of population  
1516 structure using dense haplotype data. PLoS Genet. Public Library of Science;  
1517 2012;8: e1002453.
- 1518 28. Sankararaman S, Mallick S, Dannemann M, Prüfer K, Kelso J, Pääbo S, et al.  
1519 The genomic landscape of Neanderthal ancestry in present-day humans.  
1520 Nature. 2014;507: 354–357.
- 1521 29. Vernot B, Tucci S, Kelso J, Schraiber JG, Wolf AB, Gittelman RM, et al.  
1522 Excavating Neandertal and Denisovan DNA from the genomes of Melanesian  
1523 individuals. Science. 2016;352: 235–239.
- 1524 30. Loh P-R, Lipson M, Patterson N, Moorjani P, Pickrell JK, Reich D, et al.  
1525 Inferring admixture histories of human populations using linkage  
1526 disequilibrium. Genetics. 2013;193: 1233–1254.
- 1527 31. Green RE, Krause J, Briggs AW, Maricic T, Stenzel U, Kircher M, et al. A Draft  
1528 Sequence of the Neandertal Genome. Science. 2010;328: 710–722.
- 1529 32. Pickrell JK, Pritchard JK. inference of population splits and mixtures from  
1530 genome-wide allele frequency data. PLoS Genet. Public Library of Science;  
1531 2012;8: e1002967.
- 1532 33. Durand EY, Patterson N, Reich D, Slatkin M. Testing for ancient admixture  
1533 between closely related populations. Mol Biol Evol. 2011; 28: 2239-2252
- 1534 34. Matute DR, Ayroles JF. Hybridization occurs between *Drosophila simulans*  
1535 and *D. sechellia* in the Seychelles archipelago. J Evol Biol. 2014;27: 1057–  
1536 1068.
- 1537 35. Pool JE, Corbett-Detig RB, Sugino RP, Stevens KA, Cardeno CM, Crepeau MW,  
1538 et al. Population genomics of sub-saharan *Drosophila melanogaster*: African  
1539 diversity and non-African admixture. PLoS Genet. Public Library of Science;  
1540 2012;8: e1003080.
- 1541 36. Pool JE. The mosaic ancestry of the *Drosophila* genetic reference panel and  
1542 the *D. melanogaster* reference genome reveals a network of epistatic fitness  
1543 interactions. Mol Biol Evol. 2015; 32: 3236–3251.
- 1544 37. Bachtrog D, Thornton K, Clark A, Andolfatto P. Extensive introgression of  
1545 mitochondrial DNA relative to nuclear genes in the *Drosophila yakuba*  
1546 species group. Evolution. 2006;60: 292-302.
- 1547 38. Lachaise D, Harry M, Solignac M, Lemeunier F, Bénassi V, Cariou ML.  
1548 Evolutionary novelties in islands: *Drosophila santomea*, a new *melanogaster*

- 1549 sister species from São Tomé. Proceedings of the Royal Society of London B:  
1550 Biological Sciences. The Royal Society; 2000;267: 1487–1495.
- 1551 39. Llopart A, Lachaise D, Coyne JA. Multilocus analysis of introgression  
1552 between two sympatric sister species of *Drosophila*: *Drosophila yakuba* and  
1553 *D. santomea*. Genetics. Genetics; 2005;171: 197–210.
- 1554 40. Yassin A, Debat V, Bastide H, Gidaszewski N, David JR, Pool JE. Recurrent  
1555 specialization on a toxic fruit in an island *Drosophila* population. Proc Natl  
1556 Acad Sci USA. 2016;113: 4771–4776.
- 1557 41. Comeault AA, Serrato Capuchina A, Turissini DA, McLaughlin PJ, David JR,  
1558 Matute DR. A nonrandom subset of olfactory genes is associated with host  
1559 preference in the fruit fly *Drosophila orena*. Evolution Letters. 2017;63: 16.
- 1560 42. Lachaise D, Cariou M-L, David JR, Lemeunier F, Tsacas L, Ashburner M.  
1561 Historical biogeography of the *Drosophila melanogaster* species subgroup.  
1562 Evolutionary Biology. Boston, MA: Springer US; 1988. pp. 159–225.
- 1563 43. Lachaise D, Lemeunier F. Clinal variations in male genitalia in *Drosophila*  
1564 *teissieri* Tsacas. The American Naturalist. 1981 Apr 1;117(4):600-608.
- 1565 44. Comeault AA, Venkat A, Matute DR. Correlated evolution of male and female  
1566 reproductive traits drive a cascading effect of reinforcement in *Drosophila*  
1567 *yakuba*. Proc Biol Sci. 2016;283: 20160730.
- 1568 45. Cariou ML, Silvain JF, Daubin V, Da Lage JL, Lachaise D. Divergence between  
1569 *Drosophila santomea* and allopatric or sympatric populations of *D. yakuba*  
1570 using paralogous amylase genes and migration scenarios along the  
1571 Cameroon volcanic line. Mol Ecol. 2001;10: 649–660.
- 1572 46. Coyne JA, Kim SY, Chang AS, Lachaise D, Elwyn S. Sexual isolation between  
1573 two sibling species with overlapping ranges: *Drosophila santomea* and  
1574 *Drosophila yakuba*. Evolution. 2002;56: 2424-2434.
- 1575 47. Coyne JA, Elwyn S, Kim SY, Llopart A. Genetic studies of two sister species in  
1576 the *Drosophila melanogaster* subgroup, *D. yakuba* and *D. santomea*.  
1577 Genetical research. 2004; 84: 11-26.
- 1578 48. Moehring AJ, Llopart A, Elwyn S, Coyne JA, Mackay TFC. The genetic basis of  
1579 postzygotic reproductive isolation between *Drosophila santomea* and *D.*  
1580 *yakuba* due to hybrid male sterility. Genetics. Genetics; 2006;173: 225–233.
- 1581 49. Llopart A, Lachaise D, Coyne JA. An anomalous hybrid zone in *Drosophila*.  
1582 Evolution. 2005; 59:2602-2607.
- 1583 50. Cooper BS, Ginsberg PS, Turelli M, Matute DR. *Wolbachia* in the *Drosophila*

- 1584 *yakuba* complex: pervasive frequency variation and weak cytoplasmic  
1585 incompatibility, but no apparent effect on reproductive isolation. *Genetics*.  
1586 *Genetics*; 2017;205: 333–351.
- 1587 51. Llopart A, Elwyn S, Lachaise D, Coyne JA. Genetics of a difference in  
1588 pigmentation between *Drosophila yakuba* and *Drosophila santomea*.  
1589 *Evolution*. 2002;56(11):2262-2277.
- 1590 52. Carbone MA, Llopart A, deAngelis M, Coyne JA, Mackay TFC. Quantitative  
1591 trait loci affecting the difference in pigmentation between *Drosophila*  
1592 *yakuba* and *D. santomea*. *Genetics*; 2005;171: 211–225.
- 1593 53. Cobb M, Huet M, Lachaise D, Veuille M. Fragmented forests, evolving flies:  
1594 molecular variation in African populations of *Drosophila teissieri*. *Mol Ecol*.  
1595 2000;9: 1591–1597.
- 1596 54. Cooper BS, Sedghifar A, Nash WT, Comeault AA, Matute DR. A maladaptive  
1597 combination of traits contributes to the maintenance of a stable hybrid zone  
1598 between two divergent species of *Drosophila*. *bioRxiv*. Cold Spring Harbor  
1599 *Labs Journals*; 2017;; 138388. doi:10.1101/138388
- 1600 55. Lemeunier F, Ashburner M. Relationships within the *melanogaster* Species  
1601 subgroup of the genus *Drosophila* (*Sophophora*). II. Phylogenetic  
1602 relationships between six species based upon polytene chromosome  
1603 banding sequences. *Proceedings of the Royal Society of London B: Biological*  
1604 *Sciences*; 1976;193: 275–294.
- 1605 56. Monnerot M, Solignac M, Wolstenholme DR. Discrepancy in divergence of  
1606 the mitochondrial and nuclear genomes of *Drosophila teissieri* and  
1607 *Drosophila yakuba*. *Journal of Molecular Evolution*. 1990; 30:500-508.
- 1608 57. Turissini DA, Liu G, David JR, Matute DR. The evolution of reproductive  
1609 isolation in the *Drosophila yakuba* complex of species. *J Evol Biol*. 2015;28:  
1610 557–575.
- 1611 58. Llopart A, Herrig D, Brud E, Stecklein Z. Sequential adaptive introgression of  
1612 the mitochondrial genome in *Drosophila yakuba* and *Drosophila santomea*.  
1613 *Mol Ecol*. 2014;23: 1124–1136.
- 1614 59. Beck EA, Thompson AC, Sharbrough J, Brud E, Llopart A. Gene flow between  
1615 *Drosophila yakuba* and *Drosophila santomea* in subunit V of cytochrome c  
1616 oxidase: A potential case of cytonuclear cointrogression. *Evolution*. 2015;69:  
1617 1973–1986.
- 1618 60. Langley CH, Stevens K, Cardeno C, Lee YCG, Schrider DR, Pool JE, et al.  
1619 Genomic variation in natural populations of *Drosophila melanogaster*.  
1620 *Genetics*; 2012;192: 533-598

- 1621 61. Garud NR, Petrov DA. Elevation of linkage disequilibrium above neutral  
1622 expectations in ancestral and derived populations of *Drosophila*  
1623 *melanogaster*. *Genetics*; 2016;203: 863-880
- 1624 62. Garud NR, Messer PW, Buzbas EO, Petrov DA. Recent selective sweeps in  
1625 North American *Drosophila melanogaster* show signatures of soft sweeps.  
1626 *PLoS Genet. Public Library of Science*; 2015;11: e1005004.
- 1627 63. Llopart A, Elwyn S, Lachaise D, Coyne JA. Genetics of a difference in  
1628 pigmentation between *Drosophila yakuba* and *Drosophila santomea*. 2002;  
1629 56:2262-2277.
- 1630 64. Begun DJ, Holloway AK, Stevens K, Hillier LW, Poh Y-P, Hahn MW, et al.  
1631 Population Genomics: Whole-genome analysis of polymorphism and  
1632 divergence in *Drosophila simulans*. *PLoS Biol. Public Library of Science*;  
1633 2007;5: e310.
- 1634 65. Hey J, Kliman RM. Population genetics and phylogenetics of DNA sequence  
1635 variation at multiple loci within the *Drosophila melanogaster* species  
1636 complex. *Mol Biol Evol.* 1993; 10:804-822
- 1637 66. Tamura K, Subramanian S, Kumar S. Temporal patterns of fruit fly  
1638 (*Drosophila*) evolution revealed by mutation clocks. *Mol Biol Evol.* 2004;21:  
1639 36-44.
- 1640 67. Russo CA, Takezaki N, Nei M. Molecular phylogeny and divergence times of  
1641 drosophilid species. *Mol Biol Evol.* 1995; 12:391-404.
- 1642 68. Sturtevant AH. Genetic Studies on *Drosophila simulans*. I. Introduction.  
1643 Hybrids with *Drosophila melanogaster*. *Genetics*; 1920;5: 488-500.
- 1644 69. Muirhead CA, Presgraves DC. Hybrid Incompatibilities, local adaptation, and  
1645 the genomic distribution of natural introgression between species. *The*  
1646 *American Naturalist.* 2015;187: 249-261.
- 1647 70. Charlesworth B, Coyne JA, Barton NH. The relative rates of evolution of sex  
1648 chromosomes and autosomes. *The American Naturalist*; 2015;130: 113-  
1649 146.
- 1650 71. Martin SH, Davey JW, Jiggins CD. Evaluating the use of ABBA-BABA statistics  
1651 to locate introgressed loci. *Mol Biol Evol.* 2015; 32: 244-257
- 1652 72. Turissini DA, McGirr JA, Patel SS, David JR, Matute DR. The rate of evolution  
1653 of postmating-prezygotic reproductive isolation in *Drosophila*. *bioRxiv. Cold*  
1654 *Spring Harbor Labs Journals*; 2017;: 142059. doi:10.1101/142059
- 1655 73. Purcell S, Neale B, Todd-Brown K, Thomas L, Ferreira MAR, Bender D, et al.

- 1656 PLINK: a tool set for whole-genome association and population-based  
1657 linkage analyses. *American Journal of Human Genetics*. 2007;81: 559–575.
- 1658 74. Corbett-Detig R, Jones M. SELAM: simulation of epistasis and local  
1659 adaptation during admixture with mate choice. *Bioinformatics*. 2016;  
1660 32:3035-3037.
- 1661 75. Pollard DA, Iyer VN, Moses AM, Eisen MB. Widespread discordance of gene  
1662 trees with species tree in *Drosophila*: Evidence for incomplete lineage  
1663 sorting. *PLoS Genet. Public Library of Science*; 2006;2: e173.
- 1664 76. Joly S, McLenachan PA, Lockhart PJ. A Statistical approach for distinguishing  
1665 hybridization and incomplete lineage sorting. *The American Naturalist*  
1666 2015;174: E54–E70.
- 1667 77. Matute DR. Reinforcement of gametic isolation in *Drosophila*. *PLoS Biol.*  
1668 *Public Library of Science*; 2010;8: e1000341.
- 1669 78. Matute DR, Coyne JA. Intrinsic reproductive isolation between two sister  
1670 species of *Drosophila*. *Evolution*. 2010;64: 903–920.
- 1671 79. Matute DR, Novak CJ, Coyne JA. Temperature-based extrinsic reproductive  
1672 isolation in two species of *Drosophila*. *Evolution*. 2009;63: 595–612.
- 1673 80. Matute DR. The magnitude of behavioral isolation is affected by  
1674 characteristics of the mating community. *Ecology and Evolution*. 2014;4:  
1675 2945–2956.
- 1676 81. Matute DR, Coyne JA. Intrinsic reproductive isolation between two sister  
1677 species of *Drosophila*. *Evolution*. 2010;64: 903–920.
- 1678 82. Orr HA. Haldane's rule. *Annual Review of Ecology and Systematics*. 1997;  
1679 28(1):195-218.
- 1680 83. Wu CI, Johnson NA, Palopoli MF. Haldane's rule and its legacy: Why are there  
1681 so many sterile males? *Trends in Ecology & Evolution*. 1996;11: 281–284.
- 1682 84. Delph LF, Demuth JP. Haldane's rule: Genetic bases and their empirical  
1683 support. *Journal of Heredity*. 2016.
- 1684 85. Coyne JA. The genetic basis of Haldane's rule. *Nature*. 1985;314: 736–738.
- 1685 86. Laurie CC. The weaker sex is heterogametic: 75 years of Haldane's rule.  
1686 *Genetics*. 1997. 147: 937–951.
- 1687 87. Sankararaman S, Mallick S, Patterson N, Reich D. The combined landscape of  
1688 Denisovan and Neanderthal ancestry in present-day humans. *Curr Biol.*  
1689 2016;26: 1241–1247.

- 1690 88. Payseur BA, Krenz JG, Nachman MW. Differential patterns of introgression  
1691 across the *X* chromosome in a hybrid zone between two species of house  
1692 mice. *Evolution*. 2004;58: 2064-2078.
- 1693 89. Carneiro M, Blanco Aguiar JA, Villafuerte R, Ferrand N, Nachman MW.  
1694 Speciation in the European rabbit (*Oryctolagus cuniculus*): islands of  
1695 differentiation on the *X* chromosome and autosomes. *Evolution*. B 2010;64:  
1696 3443–3460.
- 1697 90. Carneiro M, Albert FW, Afonso S, Pereira RJ, Burbano H, Campos R, et al. The  
1698 genomic architecture of population divergence between subspecies of the  
1699 European rabbit. *PLoS Genet. Public Library of Science*; 2014;10: e1003519.
- 1700 91. Coyne JA, Orr HA. Two rules of speciation. In Otte O. & Endler JA. (eds.),  
1701 *Speciation and its Consequences*. 1989 - Sinauer Associates.
- 1702 92. Coyne JA. Genetics and speciation. *Nature*. 1992;355: 511–515.
- 1703 93. Masly JP, Presgraves DC. High-resolution genome-wide dissection of the two  
1704 rules of speciation in *Drosophila*. *PLoS Biol. Public Library of Science*;  
1705 2007;5: e243.
- 1706 94. Llopart A. The rapid evolution of *X*-linked male-biased gene expression and  
1707 the large-*X* effect in *Drosophila yakuba*, *D. santomea*, and their hybrids. *Mol*  
1708 *Biol Evol*. 2012. 29:3873-86.
- 1709 95. Pool JE, Nielsen R. Inference of historical changes in migration rate from the  
1710 lengths of migrant tracts. *Genetics*; 2009;181: 711–719.
- 1711 96. Gravel S. Population genetics models of local ancestry. *Genetics*; 2012;191:  
1712 607–619.
- 1713 97. Liang M, Nielsen R. The Lengths of Admixture Tracts. *Genetics*; 2014;197:  
1714 953–967.
- 1715 98. Turissini DA, Comeault AA, Liu G, Lee YCG, Matute DR. The ability of  
1716 *Drosophila* hybrids to locate food declines with parental divergence.  
1717 *Evolution*. 2017;71: 960–973.
- 1718 99. Matute DR. Noisy neighbors can hamper the evolution of reproductive  
1719 isolation by reinforcing selection. *The American Naturalist*; 2015;185: 253–  
1720 269.
- 1721 100. Matute DR. Reinforcement can overcome gene flow during speciation in  
1722 *Drosophila*. *Curr Biol*. 2010;20: 2229–2233.
- 1723 101. Fraïsse C, Roux C, Welch JJ, Bierne N. Gene-Flow in a mosaic hybrid zone: is

- 1724 local introgression adaptive? *Genetics*; 2014;197: 939–951.
- 1725 102. Yuan Q, Song Y, Yang C-H, Jan LY, Jan YN. Female contact modulates male  
1726 aggression via a sexually dimorphic GABAergic circuit in *Drosophila*. *Nature*  
1727 *Neuroscience*; 2014;17: 81–88.
- 1728 103. Mast JD, De Moraes CM, Alborn HT, Lavis LD, Stern DL. Evolved differences  
1729 in larval social behavior mediated by novel pheromones. *Elife*. 2014;3:  
1730 e04205.
- 1731 104. Thistle R, Cameron P, Ghorayshi A, Dennison L, Scott K. Contact  
1732 Chemoreceptors mediate male-male repulsion and male-female attraction  
1733 during *Drosophila* courtship. *Cell*. 2012;149: 1140–1151.
- 1734 105. Adewoye AB, Kyriacou CP, Tauber E. Identification and functional analysis of  
1735 early gene expression induced by circadian light-resetting in *Drosophila*.  
1736 *BMC Genomics* 2011 12:1. *BioMed Central*; 2015;16: 570.
- 1737 106. Sone M, Suzuki E, Hoshino M, Hou D. Synaptic development is controlled in  
1738 the periactive zones of *Drosophila* synapses. *Development*. 2000. 127:4157-  
1739 4168.
- 1740 107. Brown EB, Layne JE, Zhu C, Jegga AG, Rollmann SM. Genome-wide  
1741 association mapping of natural variation in odour-guided behaviour in  
1742 *Drosophila*. *Genes, Brain and Behavior*. 2013;12: 503–515.
- 1743 108. Lu H-L, Wang JB, Brown MA, Euerle C, Leger RJS. Identification of *Drosophila*  
1744 mutants affecting defense to an entomopathogenic fungus. *Scientific*  
1745 *Reports*. 2015;5: 697.
- 1746 109. Morozova TV, Huang W, Pray VA, Whitham T, Anholt RRH, Mackay TFC.  
1747 Polymorphisms in early neurodevelopmental genes affect natural variation  
1748 in alcohol sensitivity in adult *Drosophila*. *BMC Genomics* 2011 12:1. 4 ed.  
1749 *BioMed Central*; 2015;16: 865.
- 1750 110. Ni JD, Baik LS, Holmes TC, Montell C. A rhodopsin in the brain functions in  
1751 circadian photoentrainment in *Drosophila*. *Nature*. 2017; 545:340-344.
- 1752 111. Rumball W, Franklin IR, Frankham R, Sheldon BL. Decline in heterozygosity  
1753 under full-sib and double first-cousin inbreeding in *Drosophila*  
1754 *melanogaster*. *Genetics*; 1994;136: 1039–1049.
- 1755 112. David JR, Gibert P, Legout H, Pétavy G, Capy P, Moreteau B. Isofemale lines in  
1756 *Drosophila*: an empirical approach to quantitative trait analysis in natural  
1757 populations. *Heredity (Edinb)*. 2005;94: 3–12.
- 1758 113. Barton N, Bengtsson BO. The barrier to genetic exchange between



- 1759            hybridising populations. *Heredity* (Edinb). 1986;57: 357–376.
- 1760    114.    Uecker H, Setter D, Hermisson J. Adaptive gene introgression after  
1761            secondary contact. *J Math Biol.* 2015;70: 1523–1580.
- 1762    115.    Juric I, Aeschbacher S, Coop G. The strength of selection against Neanderthal  
1763            introgression. *PLoS Genet. Public Library of Science*; 2016;12: e1006340.
- 1764    116.    Barton NH. Adaptation, speciation and hybrid zones. *Nature.* 1989;341:  
1765            497–503.
- 1766    117.    Barton NH, Hewitt GM. Analysis of hybrid zones. *Annual review of Ecology  
1767            and Systematics.* 1985;16:113-48.
- 1768    118.    Barton NH. Does hybridization influence speciation? *J Evol Biol.* 2013;26:  
1769            267–269.
- 1770    119.    Moore WS. An evaluation of narrow hybrid zones in vertebrates. *The  
1771            Quarterly Review of Biology.* 2015;52: 263–277. doi:10.1086/409995
- 1772    120.    Harris K, Nielsen R. Inferring demographic history from a spectrum of  
1773            shared haplotype lengths. *PLoS Genet. Public Library of Science*; 2013;9:  
1774            e1003521.
- 1775    121.    Wall JD, Hammer MF. Archaic admixture in the human genome. *Curr Opin  
1776            Genet Dev.* 2006;16: 606–610.
- 1777    122.    Hellenthal G, Busby GBJ, Band G, Wilson JF, Capelli C, Falush D, et al. A  
1778            genetic atlas of human admixture history. *Science*; 2014;343: 747–751.
- 1779    123.    Sugden LA, Ramachandran S. Integrating the signatures of demic expansion  
1780            and archaic introgression in studies of human population genomics. *Curr  
1781            Opin Genet Dev.* 2016;41: 140–149.
- 1782    124.    Deschamps M, Laval G, Fagny M, Itan Y, Abel L, Casanova J-L, et al. Genomic  
1783            Signatures of selective pressures and introgression from archaic hominins at  
1784            human innate immunity genes. *The American Journal of Human Genetics.*  
1785            2016;98: 5–21.
- 1786    125.    McCoy RC, Wakefield J, Akey JM. Impacts of Neanderthal-introgressed  
1787            sequences on the landscape of human gene expression. *Cell.* 2017;168: 916–  
1788            927.e12.
- 1789    126.    Racimo F, Sankararaman S, Nielsen R, Huerta-Sánchez E. Evidence for  
1790            archaic adaptive introgression in humans. *Nat Rev Genet*; 2015;16: 359–  
1791            371.
- 1792    127.    Eaton D, Ree RH. Inferring phylogeny and introgression using RADseq data:

- 1793 an example from flowering plants (Pedicularis: *Orobanchaceae*). Systematic  
1794 biology. 2013; 62:689-706.
- 1795 128. Senerchia N, Felber F, North B, Sarr A, Guadagnuolo R, Parisod C. Differential  
1796 introgression and reorganization of retrotransposons in hybrid zones  
1797 between wild wheats. Mol Ecol. 2016;25: 2518–2528.
- 1798 129. Gross BL, Rieseberg LH. The ecological genetics of homoploid hybrid  
1799 speciation. J Hered. 2005;96: 241–252.
- 1800 130. Soltis PS, Soltis DE. The role of hybridization in plant speciation. Annual  
1801 review of plant biology. 2009; 60: 561–588.
- 1802 131. Winger BM. Consequences of divergence and introgression for speciation in  
1803 Andean cloud forest birds. Evolution. 2017. doi:10.1111/evo.13251
- 1804 132. Rheindt FE, Fujita MK, Wilton PR. Introgression and phenotypic assimilation  
1805 in *Zimmerius* flycatchers (Tyrannidae): population genetic and phylogenetic  
1806 inferences from genome-wide SNPs. Systematic Biology. 2014 63:134-152.
- 1807 133. Moyle RG, Manthey JD, Hosner PA, Rahman M, Lakim M, Sheldon FH. A  
1808 genome-wide assessment of stages of elevational parapatry in Bornean  
1809 passerine birds reveals no introgression: implications for processes and  
1810 patterns of speciation. PeerJ; 2017;5: e3335.
- 1811 134. Toews DPL, Campagna L, Taylor SA, Balakrishnan CN, Baldassarre DT,  
1812 Deane-Coe PE, et al. Genomic approaches to understanding population  
1813 divergence and speciation in birds. The Auk; 2015;133: 13–30.
- 1814 135. Rheindt FE, Edwards SV. Genetic introgression: an integral but neglected  
1815 component of speciation in birds. The Auk; 2011;128: 620–632.
- 1816 136. Abbott R, Albach D, Ansell S, Arntzen JW, Baird SJE, Bierne N, et al.  
1817 Hybridization and speciation. J Evol Biol. 2013;26: 229–246.
- 1818 137. Mallet J. Hybridization as an invasion of the genome. Trends in Ecology &  
1819 Evolution. 2005;20: 229–237.
- 1820 138. Schwenk K, Brede N, Streit B. Introduction. Extent, processes and  
1821 evolutionary impact of interspecific hybridization in animals. Philosophical  
1822 Transactions of the Royal Society of London B: Biological Sciences. The  
1823 Royal Society; 2008;363: 2805–2811.
- 1824 139. Baack EJ, Rieseberg LH. A genomic view of introgression and hybrid  
1825 speciation. Curr Opin Genet Dev. 2007;17: 513–518.
- 1826 140. Phaff HJ. A new method of collecting *Drosophila* by means of sterile bait. The

- 1827 American Naturalist. 1955; 89:53-54.
- 1828 141. Matute DR. noisy neighbors can hamper the evolution of reproductive  
1829 isolation by reinforcing selection. The American Naturalist. 2015;185: 253–  
1830 269.
- 1831 142. Rogers RL, Cridland JM, Shao L, Hu TT. Landscape of standing variation for  
1832 tandem duplications in *Drosophila yakuba* and *Drosophila simulans*.  
1833 Molecular biology and evolution. 2014;31: 1750-1766
- 1834 143. Clark AG, Eisen MB, Smith DR, Bergman CM, Oliver B, Markow TA, et al.  
1835 Evolution of genes and genomes on the *Drosophila* phylogeny. Nature.  
1836 2007;450: 203–218.
- 1837 144. Li H, Durbin R. Fast and accurate long-read alignment with Burrows-  
1838 Wheeler transform. Bioinformatics. Oxford University Press; 2010;26: 589–  
1839 595.
- 1840 145. Li H, Handsaker B, Wysoker A, Fennell T, Ruan J, Homer N, et al. The  
1841 Sequence Alignment/Map format and SAMtools. Bioinformatics. 2009;25:  
1842 2078–2079.
- 1843 146. McKenna A, Hanna M, Banks E, Sivachenko A, Cibulskis K, Kernytsky A, et al.  
1844 The Genome Analysis Toolkit: a MapReduce framework for analyzing next-  
1845 generation DNA sequencing data. Genome Res. 2010;20: 1297–1303.
- 1846 147. DePristo MA, Banks E, Poplin R, Garimella KV, Maguire JR, Hartl C, et al. A  
1847 framework for variation discovery and genotyping using next-generation  
1848 DNA sequencing data. Nat Genet. 2011;43: 491–498.
- 1849 148. Jombart T. adegenet: a R package for the multivariate analysis of genetic  
1850 markers. Bioinformatics. 2008;24: 1403–1405.
- 1851 149. Prüfer K, Racimo F, Patterson N, Jay F, Sankararaman S, Sawyer S, et al. The  
1852 complete genome sequence of a Neanderthal from the Altai Mountains.  
1853 Nature; 2014;505: 43–49.
- 1854 150. Busing FMTA, Meijer E, Van Der Leeden R. Delete-m Jackknife for Unequal m.  
1855 Statistics and Computing; 1999;9: 3–8. 8
- 1856 151. Presgraves DC. Sex chromosomes and speciation in *Drosophila*. Trends in  
1857 Genetics; 2008;24: 336–343.
- 1858 152. Kimura M, Ohta T. The Average Number of Generations until Fixation of a  
1859 Mutant Gene in a Finite Population. Genetics; 1969;61: 763–771.
- 1860 153. Gao Z, Przeworski M, Sella G. Footprints of ancient-balanced polymorphisms

- 1861 in genetic variation data from closely related species. *Evolution*. 2015;69:  
1862 431–446.
- 1863 154. Comeron JM, Ratnappan R, Bailin S. The many landscapes of recombination  
1864 in *Drosophila melanogaster*. *PLoS Genet*. Public Library of Science; 2012;8:  
1865 e1002905.
- 1866
